# Supplementary material for: The click is not the trick: the efficacy of clickers and other reinforcement methods in training naïve dogs to perform new tasks
Source: PeerJ. 2021 Feb 22;9:e10881. doi: 10.7717/peerj.10881 (PMC7906040; doi:10.7717/peerj.10881)
Supplement: Supplemental Information 1 — Each A# represents an individual dog, with their performance on each trial reflected in the column below their identifying number. Dogs in Experiments 1 and 2 could complete no more than 50 trials, while dogs in Experiment 3 could complete no more than 49 trials. [file peerj-09-10881-s001.xlsx]

## Sheet: Experiment 1 data
primary alone
date	2015-08-11	2015-08-10	2015-08-17	2015-08-18	2015-08-23	2015-08-29	2015-08-29	2015-08-31	2015-08-15	2015-10-26	2015-10-26	2015-11-08	2015-11-08	2015-11-11	2015-11-11	2015-11-11	2015-11-11	2015-11-14	2015-11-14	2015-11-14	2015-11-21	2016-12-23	2016-12-23	2016-12-31	2016-01-07	2016-01-15	2016-01-15	2016-01-17	2016-01-24	2016-01-31
	A#512945	A#517844	A#518272	A#515400	A#518461	A#518833	A#518830	A#519080	A#517692	A#522622	A#522562	A#523272	A#523471	A#518704	A#518705	A#523473	A#518703	A#523855	A#523657	A#523854	A#524100	A#525318	A#525436	A#524641	A#526451	A#526850	A#527128	A#527246	A#525159	A#527361
trial	seconds
1	1	1	1	1	1	1	1	1	1	1	1	1	1	1	1	1	1	1	1	1	1	1	1	1	1	1	1	1	1	1
2	1	1	1	1	1	1	1	1	1	1	1	1	timeout	1	1	1	1	1	1	1	timeout	1	1	timeout	1	1	timeout	1	1	timeout
3	1	1	1	1	1	1	1	1	1	1	1	1		1	1	1	1	1	1	1		1	1		1	1		1	1
4	x	4	4	x	4	x	4	4	4	x	4	4		x	4	4	4	x	x	4		x	timeout		x	4		4	4
5	4	4	4	x	4	4	x	4	4	4	4	4		4	4	4	x	4	4	x		x			4	4		4	x
6	x	4	x	1	4	4	x	4	4	4	x	4		4	4	4	4	4	4	4		1			4	4		4	4
7	4	x	4	1	7	4	1	7	7	x	4	7		x	x	7	x	4	4	4		1			4	7		7	4
8	x	7	4	1	7	7	1	7	7	x	4	7		4	x	7	4	x	7	4		1			7	7		7	x
9	4	7	4	4	7	7	1	7	timeout	1	4	7		x	x	7	4	x	7	x		4			7	7		7	x
10	x	7	x	4	10	7	4	10		1	7	10		x	4	10	x	4	x	7		x			7	10		10	1
11	x	x	7	4	10	10	4	10		1	7	10		1	4	10	4	4	x	7		4			10	10		10	1
12	1	10	x	x	10	10	4	10		4	x	10		1	4	10	4	4	4	x		4			10	10		10	1
13	1	10	x	x	13	10	7	13		x	7	13		1	x	13	4	7	x	x		4			10	13		x	4
14	1	10	4	4	13	x	7	13		4	7	13		4	x	13	7	7	4	x		7			13	13		13	x
15	4	13	4	x	13	13	7	13		4	7	13		x	x	13	7	x	4	4		7			13	13		13	timeout
16	4	13	4	x	16	x	x	16		4	10	16		4	4	16	7	7	4	x		7			13	16		x
17	4	13	7	1	16	13	10	16		7	x	16		x	4	16	10	7	7	4		10			16	16		x
18	7	x	7	1	16	x	x	16		7	10	16		4	4	16	10	7	7	x		10			timeout	16		10
19	7	16	x	1	19	13	x	19		7	10	19		4	7	19	10	10	7	x		10				19		10
20	7	x	x	4	19	13	7	19		10	10	19		4	7	19	13	10	x	1		x				timeout		x
21	x	16	4	x	19	13	7	19		x	13	19		7	7	x	13	x	10	1		13						x
22	10	16	4	x	22	16	x	22		10	x	22		7	x	x	x	x	x	1		x						7
23	x	16	4	1	x	x	7	x		x	13	x		x	10	16	13	7	10	4		13						7
24	10	19	x	1	22	16	7	22		x	x	22		x	10	16	13	x	10	4		13						7
25	x	x	x	1	22	x	7	22		7	13	22		4	10	16	x	7	10	4		13						x
26	x	19	4	4	22	16	10	22		7	13	22		4	x	x	13	x	13	7		16						x
27	7	19	4	x	25	16	x	25		7	13	25		4	x	x	x	x	13	7		16						7
28	7	19	4	4	25	16	10	25		x	16	25		7	x	x	13	4	x	7		16						7
29	7	22	7	x	x	19	10	25		10	16	25		7	10	x	13	4	13	x		19						7
30	10	22	x	4	25	19	10	28		10	16	28		7	x	13	13	4	13	x		19						x
31	10	x	x	4	x	19	13	28		x	19	28		x	x	13	16	7	13	7		19						10
32	10	22	x	4	x	22	13	28		10	19	28		10	7	13	x	7	x	x		22						x
33	13	22	x	x	22	22	x	31		x	19	x		10	7	16	16	7	16	7		22						x
34	13	22	1	x	22	22	x	31		10	22	31		10	7	16	x	10	16	7		22						x
35	x	25	1	4	22	25	x	31		10	22	x		13	10	x	16	10	16	7		x						7
36	13	25	1	4	25	25	x	x		10	22	x		13	10	16	16	10	19	10		25						7
37	x	25	4	4	25	25	x	x		x	25	28		13	10	16	16	13	19	10		25						7
38	x	28	x	x	25	x	x	x		x	x	28		x	x	16	19	13	x	10		x						10
39	10	28	4	7	28	28	4	x		10	25	28		x	13	x	x	13	19	13		x						10
40	x	28	x	x	x	28	4	28		x	x	31		13	x	19	19	x	19	13		timeout						10
41	10	31	4	x	28	28	4	28		x	x	31		13	x	19	19	16	x	13								x
42	10	x	4	4	x	x	7	28		x	x	31		13	10	19	19	16	19	16								13
43	10	x	x	x	x	31	7	x		7	x	34		16	10	22	x	16	19	x								13
44	13	28	4	x	x	x	7	31		x	x	34		16	x	22	22	19	19	16								x
45	13	28	4	1	22	x	10	31		7	x	34		16	x	22	22	19	22	16								x
46	13	28	4	1	22	28	10	31		x	16	37		19	7	25	x	19	22	16								10
47	16	31	7	1	22	x	x	34		7	16	37		19	7	25	22	22	22	x								x
48	x	31	7	4	25	28	x	34		7	16	37		19	7	25	22	22	x	x								x
49	16	31	x	4	25	28	x	34		7	19	40		22	10	28	22	22	25	16								7
50	16	34	7	4	25	28	7	37		x	x	40		x	10	28	25	25	25	16								7
verbal
date	2015-08-13	2015-08-13	2015-09-07	2015-09-07	2015-10-03	2015-10-19	2015-08-17	2015-08-31	2015-10-17	2015-08-11	2015-09-07	2015-10-03	2015-10-19	2015-08-31	2015-09-12	2015-08-29	2015-09-13	2015-10-13	2015-10-17	2015-11-14	2015-11-21	2016-12-19	2016-12-23	2016-12-31	2016-01-09	2016-01-15	2016-01-17	2016-01-23	2016-01-24	2016-01-31
	A#517791	A#512943	A#518949	A#519408	A#517323	A#521748	A#516153	A#518960	A#521492	A#516533	A#519369	A#517324	A#521997	A#519029	A#519719	A#518225	A#519756	A#521621	A#unknown	A#523585	A#524035	A#525907	A#525320	A#525249	A#526852	A#527133	A#527247	A#524619	A#525199	A#526907
trial	seconds
1	1	1	1	1	1	1	1	1	1	1	1	1	1	1	1	1	1	1	1	1	1	1	1	1	1	1	1	1	1	1
2	1	1	1	1	1	1	timeout	timeout	1	timeout	1	1	1	1	1	1	1	1	1	1	1	1	1	1	timeout	1	timeout	timeout	x	1
3	1	1	1	1	1	1			timeout		timeout	1	1	1	1	1	1	1	1	1	1	1	1	1		1			x	1
4	1	4	4	4	x	x						x	4	4	4	4	4	4	x	4	4	4	4	4		4			1	x
5	x	4	x	4	4	4						timeout	4	4	4	4	x	4	x	4	4	4	4	4		4			1	x
6	4	x	4	x	4	4							4	4	4	4	4	4	1	4	4	4	4	4		4			1	1
7	x	x	4	4	4	4							7	7	x	7	4	7	1	7	7	7	7	x		timeout			4	1
8	4	1	x	4	7	x							timeout	7	x	7	4	x	1	7	7	x	7	7					4	1
9	4	1	4	4	x	7								timeout	4	7	x	7	x	7	7	7	7	x					x	4
10	4	1	4	7	x	7									4	10	x	7	x	10	x	x	10	7					4	4
11	7	4	4	x	4	7									4	10	x	7	1	10	10	x	10	7					4	4
12	7	4	7	7	4	x									7	10	4	10	1	10	x	x	x	7					4	x
13	7	x	7	7	4	x									timeout	timeout	4	x	1	13	10	x	x	10					7	7
14	x	4	x	x	7	x											4	10	x	13	10	1	x	10					7	7
15	10	4	7	7	x	7											7	10	4	13	10	1	7	10					7	7
16	x	x	x	7	7	7											x	10	x	16	13	1	7	13					timeout	x
17	x	4	7	7	7	7											x	13	4	16	13	x	x	13						x
18	7	4	x	10	7	x											4	13	4	16	13	x	x	13						x
19	7	x	x	10	10	x											x	13	x	x	16	1	x	x						7
20	x	4	4	x	10	7											4	x	4	19	x	1	4	16						x
21	7	4	4	x	x	7											4	16	x	19	16	1	4	x						x
22	7	x	4	x	x	7											x	16	x	19	16	x	4	16						4
23	7	4	7	7	x	10											4	16	1	22	16	4	7	x						x
24	x	4	7	x	7	x											4	x	1	22	x	4	7	x						4
25	x	4	7	x	x	x											4	x	1	22	x	x	7	x						4
26	7	x	10	4	x	x											timeout	16	x	25	x	4	10	13						4
27	7	7	10	4	4	7												16	4	25	x	4	10	x						7
28	7	7	10	4	4	x												timeout	x	x	13	timeout	10	x						7
29	10	x	13	x	4	7													x	25	x		13	10						7
30	10	7	x	x	7	7													1	x	timeout		13	10						timeout
31	x	x	13	4	7	7													1	25			13	10
32	10	7	13	x	x	x													1	25			x	13
33	x	7	x	4	x	x													x	25			16	13
34	10	7	x	4	4	x													x	x			16	x
35	10	10	10	4	4	7													1	28			16	x
36	x	10	10	7	4	7													timeout	28			19	10
37	10	10	10	7	7	x														28			19	10
38	10	13	13	7	7	7														x			19	10
39	10	13	13	10	7	7														31			22	13
40	13	x	x	10	10	7														x			22	13
41	13	x	x	10	x	10														31			22	13
42	x	x	10	13	x	10														x			25	16
43	13	x	10	x	7	x														31			25	16
44	x	7	10	13	7	x														31			25	16
45	13	x	x	13	7	7														31			x	19
46	13	7	x	13	10	7														34			28	19
47	x	7	10	x	10	x														34			28	x
48	13	7	10	16	x	x														34			28	x
49	x	x	10	16	10	4														x			31	16
50	13	10	13	16	10	x														37			31	16
clicker
date	2015-08-15	2015-08-24	2015-08-29	2015-09-07	2015-09-12	2015-10-10	2015-10-17	2015-10-19	2015-10-10	2015-09-06	2015-08-11	2015-09-07	2015-08-17	2015-10-12	2015-10-10	2015-09-12	2015-08-15	2015-11-14	2015-11-14	2015-11-21	2015-11-21	2016-12-19	2016-12-23	2016-01-07	2016-01-09	2016-01-15	2016-01-17	2016-01-23	2016-01-31	2016-01-31
	A#518059	A#518463	A#518839	A#518950	A#519720	A#521027	A#522013	A#521749	A#521689	A#519188	A#517834	A#519368	A#518273	A#521751	A#521492	A#519718	A#518212	A#523415	A#523853	A#524101	A#524036	A#525794	A#525434	A#526779	A#526851	A#527132	A#527248	A#527428	A#526906	A#528039
trial	seconds
1	1	1	1	1	1	1	1	1	1	1	1	1	1	1	1	1	1	1	1	1	1	1	1	1	1	1	1	1	1	1
2	1	1	1	1	1	1	1	1	timeout	1	1	1	1	1	1	1	1	1	1	timeout	1	timeout	1	1	1	x	1	1	1	1
3	1	1	1	1	1	1	1	1		1	x	1	1	1	1	1	1	1	1		1		1	1	1	1	1	1	1	1
4	4	4	4	4	4	4	4	4		timeout	timeout	4	x	x	4	4	4	x	4		4		x	4	x	1	x	4	timeout	4
5	x	4	4	4	x	4	4	4				4	x	x	4	4	4	4	4		4		4	timeout	4	1	4	4		4
6	x	4	4	4	4	4	4	4				timeout	1	1	4	4	4	4	x		4		4		x	4	4	x		4
7	1	7	7	7	4	7	7	7					timeout	1	7	7	7	4	x		x		4		4	4	4	4		x
8	x	7	7	x	4	7	7	x						1	7	7	7	x	1		7		7		4	4	7	4		7
9	1	x	7	7	7	7	7	7						timeout	7	7	7	7	1		7		7		x	7	7	4		x
10	1	7	10	7	7	x	10	x							x	x	10	x	1		x		7		x	7	x	x		x
11	x	7	10	7	x	10	x	x							10	10	10	timeout	4		7		10		1	7	x	x		4
12	1	7	10	x	7	10	10	4							10	x	10		4		7		10		1	10	4	4		4
13	1	10	13	x	x	10	10	4							x	10	13		4		7		x		1	x	4	4		4
14	1	10	13	x	x	13	10	4							timeout	10	13		7		10		10		x	10	4	4		7
15	4	10	x	x	4	13	13	x								10	13		7		10		10		4	10	x	7		7
16	x	13	13	4	4	13	13	7								x	16		7		10		10		4	10	7	7		7
17	4	13	13	x	4	16	13	7								13	16		10		x		x		x	13	7	x		x
18	4	13	13	4	x	16	16	x								x	16		x		x		x		4	13	x	7		10
19	4	16	16	4	7	16	x	x								x	19		10		x		10		4	13	7	7		10
20	7	16	16	4	7	x	16	4								10	19		10		x		10		x	x	x	7		x
21	x	x	16	x	7	x	x	4								10	19		10		7		x		4	16	7	10		10
22	x	16	19	7	10	x	16	4								x	22		x		7		10		4	16	7	x		10
23	7	16	19	7	10	16	16	7								10	22		x		7		10		4	x	x	10		10
24	7	16	19	7	10	16	x	7								timeout	22		x		10		10		7	16	x	x		13
25	7	19	22	x	13	16	16	x									25		x		10		x		7	16	4	10		13
26	x	19	22	x	13	19	16	7									25		x		x		x		x	16	4	10		13
27	7	19	22	x	13	19	x	7									25		x		10		10		7	19	4	x		16
28	x	22	x	7	16	19	16	7									28		timeout		10		x		7	19	7	10		16
29	7	22	25	x	16	22	16	10									28				10		x		7	19	x	10		16
30	x	22	25	7	16	22	16	x									28				13		x		x	x	7	10		19
31	x	25	25	x	x	22	x	x									31				13		7		10	22	7	13		19
32	x	x	28	7	19	25	19	7									timeout				x		7		10	22	7	x		19
33	x	25	28	x	19	25	19	7													x		7		x	22	10	x		22
34	1	x	28	7	x	x	19	7													10		10		10	25	10	x		timeout
35	1	x	31	7	19	x	22	10													10		10		10	25	x	x
36	1	x	x	7	x	x	22	10													10		10		10	25	10	7
37	4	22	x	10	x	x	22	10													x		13		13	28	10	x
38	4	x	28	10	16	19	25	13													x		13		x	x	10	x
39	4	22	28	10	16	x	25	13													timeout		13		13	timeout	x	4
40	x	22	28	13	16	19	25	x															x		13		x	4
41	7	22	31	x	19	19	28	x															x		13		10	4
42	x	25	31	x	19	19	28	x															13		16		10	7
43	x	25	31	x	x	22	28	x															x		16		10	7
44	4	25	x	10	x	22	31	x															13		16		13	7
45	4	28	x	x	16	22	31	7															x		19		13	x
46	x	28	31	x	16	25	31	7															13		19		13	x
47	x	28	x	7	16	25	34	7															x		x		16	7
48	1	31	31	7	x	25	34	x															x		x		x	7
49	1	31	31	7	19	28	34	x															10		16		x	7
50	1	31	31	10	19	x	37	x															10		16		13	x

## Sheet: Experiment 2 data
primary alone
	2016-06-16	2016-06-19	2016-06-24	2016-06-25	2016-07-02	2016-07-15	2016-07-15	2016-07-17	2016-07-21	2016-07-23	2016-07-24	2016-07-30	2016-08-04	2016-08-04	2016-08-05	2016-08-06	2016-08-11	2016-08-13	2016-08-14	2016-08-25	2016-08-27	2016-08-27	2016-08-28	2016-09-02	2016-09-02
	A#537279	A#537649	A#537712	A#537189	A#538221	A#538598	A#536320	A#535787	A#535759	A#539316	A#539885	A#538378	A#537506	A#539190	A#540279	A#539987	A#541156	A#539182	A#540922	A#541049	A#540307	A#542066	A#542031	A#539026	A#541381
trial	step
1	1	1	1	1	1	1	1	1	1	1	1	1	1	1	1	1	1	1	1	1	1	1	1	1	1
2	1	1	1	1	1	1	1	1	1	1	1	1	1	1	1	1	1	1	1	1	1	1	1	1	1
3	1	1	1	1	1	1	1	1	1	1	1	x	1	1	1	1	1	1	1	1	1	1	1	1	1
4	2	2	2	2	2	2	2	2	2	2	2	x	2	2	2	2	2	2	2	2	2	2	2	2	2
5	2	2	2	2	2	2	2	2	2	2	x	1	x	2	2	2	2	2	x	2	2	2	2	2	2
6	2	2	2	2	2	2	2	2	2	2	2	1	x	x	2	2	2	2	2	2	2	2	2	2	2
7	3	3	3	3	3	3	3	3	3	3	x	x	1	2	3	3	3	3	2	3	3	3	3	3	3
8	3	3	3	3	3	3	3	3	3	3	x	1	1	2	3	x	3	3	2	3	x	3	3	3	3
9	3	3	3	3	3	3	3	3	3	3	timeout	x	1	2	3	x	3	3	3	3	3	3	3	3	3
10	4	4	4	4	4	4	4	4	4	4		1	2	x	4	2	4	4	3	4	3	4	4	4	4
11	4	4	4	4	4	4	4	4	4	4		1	2	3	4	2	4	4	3	4	3	4	4	4	4
12	4	x	4	4	4	4	4	4	4	4		1	2	3	4	x	4	4	4	x	4	4	4	4	4
13	5	4	5	5	5	5	5	5	5	5		x	3	3	5	x	5	5	4	x	4	5	5	5	5
14	5	4	5	x	5	5	5	x	5	5		2	3	4	x	1	x	5	4	x	4	5	5	5	5
15	x	4	5	5	x	x	5	5	5	5		2	3	4	x	1	x	5	5	timeout	5	5	5	x	5
16	5	5	6	5	5	x	6	5	6	6		2	4	x	4	1	4	6	5		x	6	6	5	x
17	5	5	6	5	5	4	6	5	6	6		3	4	4	4	2	x	6	5		5	6	6	5	x
18	5	5	6	6	5	x	6	6	6	6		3	4	4	4	2	x	x	x		5	x	2 min inside line	5	5
19	6	6	x	x	6	4	7	6	7	7		3	5	4	x	2	x	6	6		5	x	x	6	5
20	x	6	7	6	6	x	7	6	7	7		4	x	x	x	3	3	x	x		6	5	5	6	5
21	6	6	7	6	6	4	7	7	7	7		4	x	5	4	3	3	x	6		x	5	5	6	6
22	6	7	7	6	7	x	8	7	8	x		4	4	x	4	3	3	5	6		6	5	5	7	6
23	x	7	8	7	7	x	8	7	8	x		5	4	x	x	x	4	5	6		6	x	6	7	6
24	6	7	8	7	7	3	8	8	x	cannot go back from here		5	4	4	4	4	4	5	x		6	2 min inside line	6	7	x
25	6	8	8	7	8	3	9	8	8			5	5	4	4	4	4	6	7		7	2 min inside line	x	8	7
26	6	x	x	x	8	3	9	8	x			6	5	x	4	4	5	6	7		7	2 min inside line	x	8	x
27	7	8	9	x	8	x	9	9	x			6	5	4	x	5	5	6	x		7		5	8	x
28	7	8	9	cannot go back from here	9	x	10	9	cannot go back from here			6	6	4	5	x	5	7	7		8		5	x	x
29	7	x	9		x	3	10	9				7	6	4	x	x	6	x	x		8		5	9	6
30	8	8	10		9	3	10	10				7	6	5	x	4	6	7	x		x		2 min inside line	9	6
31	x	x	10		9	3	11	10				x	7	x	4	4	6	x	6		x		2 min inside line	9	6
32	x	x	10		9	x	11	x				7	7	5	4	4	7	7	6		cannot go back from here		5	x	7
33	cannot go back from here	cannot go back from here	11		10	4	11	x				x	7	x	4	5	7	7	x				5	timeout	7
34			11		x	4	12	9				7	8	x	5	x	7	7	6				2 min inside line		7
35			11		10	x	12	9				7	x	4	x	x	x	x	6				x		8
36			12		10	x	12	9				7	8	4	x	x	x	8	6				x		8
37			12		x	3	13	10				x	8	x	4	4	cannot go back from here	x	7				4		8
38			12		x	3	13	10				8	x	x	4	4		8	7				4		9
39			13		9	3	13	10				8	timeout	3	x	x		8	7				4		x
40			13		9	4	14	11				8		3	x	timeout		8	x				5		x
41			13		9	4	14	11				x		x	3			9	x				5		8
42			14		10	4	14	11				9		3	3			9	cannot go back from here				5		8
43			14		10	x	15	12				9		x	3			9					6		8
44			14		10	x	15	2 min inside line				9		x	x			x					6		x
45			15		11	x	15	12				10		x	x			x					6		9
46			15		11	x	16	x				10		2	3			timeout					7		x
47			15		x	3	16	timeout				10		x	3								x		9
48			16		x	3	16					11		2	3								7		9
49			16		x	3	17					11		x	x								7		x
50			16		timeout	4	17					11		2	4								2 min inside line		x
verbal
date	2016-06-16	2016-06-19	2016-06-24	2016-06-25	2016-07-16	2016-07-16	2016-07-16	2016-07-21	2016-07-21	2016-07-22	2016-07-29	2016-07-30	2016-08-04	2016-08-04	2016-08-06	2016-08-11	2016-08-13	2016-08-14	2016-08-20	2016-08-25	2016-08-25	2016-08-27	2016-08-28	2016-09-02	2016-09-02
	A#537412	A#537621	A#535399	A#537405	A#535794	A#539172	A#535754	A#534018	A#539391	A#538383	A#538414	A#538382	A#537503	A#540550	A#539986	A#541157	A#539183	A#540923	A#541034	A#541047	A#541048	A#541733	A#542030	A#541147	A#541380
trial	step
1	1	1	1	1	1	1	1	1	1	1	1	1	1	1	1	1	1	1	1	1	1	1	1	1	1
2	1	1	1	1	1	1	1	1	1	1	1	1	x	1	1	1	1	1	1	1	x	1	1	1	1
3	1	1	1	1	1	1	1	1	1	1	1	1	x	1	1	1	1	x	1	1	x	1	1	1	1
4	2	2	2	2	2	2	2	2	2	2	2	2	1	2	2	2	2	x	2	2	x	x	2	2	2
5	x	2	2	2	2	2	2	2	2	x	2	2	x	2	2	2	2	1	2	2	x	x	2	2	2
6	2	x	2	2	2	2	2	2	2	2	2	2	1	2	2	2	2	1	2	2	x	timeout	2	2	2
7	2	2	3	3	x	3	3	3	3	2	3	3	1	3	3	3	3	1	3	3	x		3	3	3
8	2	2	3	3	3	3	3	3	3	2	3	3	1	3	3	3	3	2	3	3	x		3	3	3
9	3	2	3	3	3	3	3	3	3	3	3	3	2	3	3	3	3	2	3	3	x		3	3	3
10	3	3	4	4	3	4	4	4	4	3	4	4	2	4	4	4	4	2	4	4	1		x	4	4
11	3	3	4	4	4	4	4	4	4	3	4	4	x	4	4	4	4	3	4	4	1		4	4	4
12	4	3	4	x	2 min inside line	4	4	4	4	4	4	4	2	4	4	4	4	3	4	4	x		4	4	4
13	4	4	5	4	x	5	5	5	5	4	5	5	2	5	5	5	5	3	5	5	1		4	5	5
14	4	4	x	4	2 min inside line	5	5	5	5	4	5	5	2	5	5	5	5	4	5	5	1		5	5	x
15	5	4	x	4	3	5	x	x	5	5	5	5	3	x	5	5	5	4	x	5	1		5	5	timeout
16	5	5	4	5	3	x	5	5	x	5	6	6	3	5	6	6	6	4	x	2 minutes inside	x		5	6
17	5	5	4	5	3	x	5	5	x	5	x	6	x	2 min inside	6	6	6	5	x	6	2		x	x
18	6	5	4	5	4	x	5	5	x	6	6	6	3	5	6	6	6	x	4	x	2		6	x
19	6	6	x	x	4	x	x	x	x	6	6	7	3	5	7	7	7	5	4	6	2		6	5
20	6	6	x	x	4	4	6	x	4	6	6	7	x	5	7	7	7	5	x	6	3		6	x
21	7	6	x	x	5	x	6	5	4	7	7	7	x	6	7	7	7	5	x	6	3		7	x
22	7	7	4	x	5	2 min inside line	x	5	4	7	7	8	2	x	x	x	8	6	3	7	x		7	4
23	7	7	4	x	2 min inside line	4	x	5	5	7	7	x	2	x	x	x	x	6	3	2 minutes inside	3		7	4
24	8	7	4	x	5	4	5	6	x	x	8	x	2 min inside	5	cannot go back from here	cannot go back from here	x	6	3	2 minutes inside	x		8	4
25	8	8	5	3	2 min inside line	x	5	6	x	8	8	cannot go back from here	x	5			cannot go back from here	7	4	2 minutes inside	x		8	x
26	x	x	5	3	2 min inside line	x	5	6	4	8	x		1	5				7	4		x		8	5
27	8	8	5	3	4	3	6	x	4	x	x		2 min inside	6				7	4		x		9	5
28	8	8	x	4	timeout	3	x	x	4	x	cannot go back from here		1	x				8	x		x		x	x
29	x	x	6	4		3	6	6	5	cannot go back from here			2 min inside	6				8	x		x		9	5
30	x	8	6	4		4	6	6	5				x	6				8	4		x		9	5
31	cannot go back from here	x	x	2 min inside line		4	6	6	x				1	6				9	4		x		9	x
32		8	6	2 min inside line		4	7	7	x				x	7				9	4		1		10	5
33		x	x	4		5	7	7	4				2 min inside	x				9	x		x		10	5
34		timeout	x	2 min inside line		x	7	7	4				2 min inside	7				10	5		1		x	x
35			x	2 min inside line		x	8	8	x				2 min inside	7				10	x		x		10	x
36			x	2 min inside line		4	8	8	4					7				10	5		1		10	4
37			4			4	8	8	4					x				11	x		x		10	4
38			x			4	9	9	4					8				11	5		x		11	4
39			x			x	9	9	5					timeout				11	x		x		11	x
40			3			x	9	9	5									12	x		x		11	x
41			3			4	10	10	x									12	4		1		12	x
42			3			4	10	10	x									12	x		x		12	x
43			x			4	10	10	x									13	4		x		12	3
44			x			5	11	11	4									13	4		1		13	3
45			3			5	11	11	4									13	4		1		13	3
46			3			5	11	11	4									14	x		1		13	4
47			x			6	12	12	5									14	5		x		14	4
48			3			6	12	12	x									14	5		x		14	4
49			3			6	12	12	5									15	5		1		14	5
50			3			7	13	13	x									15	6		1		15	5
clicker
date	2016-06-19	2016-06-25	2016-07-01	2016-07-02	2016-07-02	2016-07-15	2016-07-17	2016-07-17	2016-07-21	2016-07-23	2016-07-24	2016-07-29	2016-07-30	2016-08-04	2016-08-05	2016-08-11	2016-08-13	2016-08-14	2016-08-25	2016-08-25	2016-08-27	2016-08-28	2016-09-02	2016-09-04	2016-09-04
	A#531904	A#537963	A#unknown	A#538483	A#538219	A#538597	A#535790	A#535753	A#535793	A#539545	A#539886	A#540061	A#539762	A#537502	A#540284	A#541070	A#539184	A#540921	A#537179	A#541046	A#541715	A#542029	A#541146	A#540981	A#540982
trial	step
1	1	1	1	1	1	1	1	1	1	1	1	1	1	1	1	1	1	1	1	1	1	1	1	1	1
2	1	x	x	1	1	1	1	timeout	1	1	1	1	1	1	1	1	1	1	1	1	1	1	1	1	1
3	1	1	x	1	1	1	1		1	1	x	1	1	1	1	1	1	1	1	1	1	1	1	1	1
4	x	1	x	x	2	2	2		2	2	timeout	2	2	x	2	2	2	2	2	2	2	2	2	2	2
5	2	1	timeout	2	2	2	2		2	2		2	2	2	2	2	2	2	2	2	2	2	2	2	2
6	2	2		2	2	2	2		2	2		2	2	x	2	2	2	2	2	2	2	2	2	2	2
7	2	2		2	3	3	3		3	3		3	3	x	3	3	2	3	3	3	3	3	3	3	3
8	3	2		3	3	3	3		3	3		3	3	1	3	3	3	3	3	3	3	3	3	3	3
9	3	3		3	3	3	3		3	3		3	3	1	3	3	3	3	3	3	3	3	3	3	3
10	3	3		3	4	4	4		4	4		4	4	1	4	4	3	4	4	4	4	4	4	4	4
11	4	3		4	4	4	4		4	4		4	4	x	4	4	4	4	4	x	4	4	4	4	4
12	4	4		4	4	4	4		4	4		4	4	2	4	4	4	4	4	4	4	4	4	4	4
13	4	4		4	x	5	5		5	5		5	5	2	x	5	4	5	5	4	5	5	5	5	5
14	5	4		5	x	5	5		5	5		x	x	2	5	5	5	5	5	x	5	5	5	5	5
15	x	5		5	4	x	5		5	5		5	x	3	5	5	5	5	5	x	5	x	5	5	5
16	5	5		x	4	5	2 min inside line		x	6		5	4	3	5	x	x	6	6	3	6	5	6	6	6
17	5	5		x	4	x	6		x	x		x	4	3	6	x	5	x	6	x	x	5	x	6	6
18	5	6		x	x	x	6		5	6		5	4	4	6	5	x	x	6	3	6	5	x	6	6
19	6	6		4	x	4	6		5	x		5	5	x	6	5	x	x	7	x	x	6	5	x	x
20	6	6		4	x	4	7		5	x		x	x	timeout	7	x	4	5	7	timeout	6	6	x	7	7
21	6	7		4	4	4	7		x	x		5	x		7	5	4	5	7		6	6	5	7	7
22	7	7		5	4	2 min inside line	7		x	5		5	4		7	x	x	5	8		x	7	5	7	x
23	7	7		5	4	x	8		5	5		5	4		8	x	4	6	8		6	7	5	x	7
24	7	8		5	x	x	8		5	5		6	4		8	4	x	6	8		6	7	6	x	7
25	8	8		6	x	4	8		5	6		6	x		8	x	4	x	x		6	x	6	cannot go back from here	7
26	8	8		6	4	4	9		6	6		6	5		9	4	4	x	9		7	8	6		x
27	8	9		x	4	4	9		x	6		7	5		9	4	x	5	9		x	x	7		x
28	9	x		x	4	x	9		x	7		7	x		9	4	4	5	9		7	8	7		cannot go back from here
29	9	x		5	5	x	10		5	7		7	5		10	x	4	5	10		x	x	7
30	9	x		x	5	4	10		x	7		8	5		10	x	4	x	10		timeout	8	8
31	10	x		5	5	x	10		x	8		8	5		10	x	x	x	10			x	8
32	10	cannot go back from here		5	6	4	11		4	8		8	x		11	4	x	5	11			8	8
33	10			5	6	4	11		4	8		9	x		11	4	4	5	11			x	9
34	11			x	6	x	11		4	9		9	5		timeout	4	4	x	11			8	9
35	11			x	7	4	12		5	9		9	5			5	4	x	12			8	x
36	11			5	7	4	12		5	9		10	5			5	5	4	12			x	9
37	12			x	7	4	12		x	10		10	6			5	5	4	12			8	9
38	12			5	8	5	x		2 min inside line	10		10	6			6	5	4	13			8	9
39	12			5	8	5	13		4	10		11	6			6	6	5	13			x	10
40	13			5	8	5	13		4	11		11	7			6	6	5	13			x	10
41	13			6	9	6	13		4	11		11	7			7	6	5	14			cannot go back from here	11
42	13			6	9	6	14		5	11		12	7			7	7	6	14				11
43	x			6	x	6	14		5	12		12	8			7	7	x	14				11
44	x			7	9	7	14		5	12		12	8			x	7	6	15				12
45	x			7	9	7	15		6	12		13	8			8	8	6	15				12
46	x			7	x	7	15		6	13		13	9			8	8	6	15				12
47	x			x	9	8	15		x	13		13	9			x	8	7	16				timeout
48	x			x	9	8	16		x	13		14	9			x	9	7	16
49	11			cannot go back from here	9	x	16		5	14		14	10			cannot go back from here	9	7	16
50	11				10	x	timeout		5	14		14	10				9	8	17
dogs who did not complete step 1:
primary alone	A#537673	unknown on 7/1		A#539676
verbal	A#530751	A#535400	A#539194	unknown on 7/24
clicker	A#530752	A#537857

## Sheet: Experiment 3 data
color corresponds to the 3 blocks of the same color, letter corresponds to which side pair the dog started on
clicker	R	R	L	L	L	L	L	R	R	L	L	L	L	L	R	L	L	R	R	R	R	R	R	L	R	R	R	R	L	R	R	R	L	L
	2017-02-18	2017-02-23	2017-03-02	2017-03-09	2017-03-16	2017-03-23	2017-03-23	2017-03-26	2017-03-27	2017-03-30	2017-04-02	2017-04-02	2017-04-06	2017-04-06	2017-04-09	2017-04-10	2017-04-13	2017-04-20	2017-04-20	2017-04-23	2017-04-24	2017-04-27	2017-04-30	2017-04-30	2017-05-04	2017-05-04	2017-10-13	2017-10-13	2017-10-16	2017-10-21	2017-10-30	2017-11-03	2017-11-10	2017-11-10	2017-04-13
	A#550228	A#554177 (or 551477)	A#548691	A#552242	A#548849	A#552958	A#553956	A#552966	A#553955	A#553741	A#554858	A#554857	A#555036	A#554668	A#554903	A#553328	A#555381	A#552841	A#553751	A#555476	A#555474	A#555390	A#553329	A#555212	A#552655	A#554762	A#565567	A#565562	A#568048	A#569010	A#569403	A#568239	A#569180	A#569195	A#555702
trial	level
1	1-2	1-2	1-5	1-2	1-1	1-4	1-5	1-4	1-1	1-1	1-5	1-5	1-1	1-4	1-5	1-4	1-2	1-5	1-1	1-2	1-2	1-4	1-5	1-4	1-5	1-1	1-2	1-2	1-3	1-4	1-2	1-3	1-3	1-1	did not touch
2	1-1	1-3	1-1	1-5	1-5	1-3	1-2	1-2	1-5	1-5	1-1	1-2	1-5	1-2	1-3	1-3	1-1	1-4	1-4	1-4	1-1	1-2	1-2	1-3	1-1		1-1	1-1	1-4	1-1	1-4	1-2	1-4	1-5
3	1-4	1-5	1-3	1-4	1-3	1-1	1-4	1-5	1-3	1-4	1-4	1-1	1-3	1-1	1-4	1-2	1-4	1-1	1-5	1-3	1-4	1-5	1-3	1-1	1-4		1-3	1-3	1-1	1-5	1-5	1-1	1-5	1-3
4	1-3	1-1	1-4	1-3	1-4	1-5	1-1	1-1	1-4	1-3	1-3	1-4	1-2	1-3	1-1	1-5	1-3	1-3	1-2	1-1	1-5	1-1	1-1		1-3			1-4	1-2	1-2	1-3	1-4	1-1	1-4
5	1-5	1-4	1-2	1-1	1-2	1-2	1-3	1-3	1-2	1-2	1-2	1-3	1-4	1-5	1-2	1-1	1-5	1-2		1-5	1-3	1-3	1-4		1-2			1-5	1-5	1-3	1-1	1-5	1-2	1-2
6	2	2	2	2	2	2	2	2	2	2	2	2	2	2	2	2	2	2		2	2	2	2		2			2	2	2	2	2	2	2
7	2	2	2	2	2	2	2	2	2	2	2	2	2	2	2	2	2	2		2	2	2	2		2			2	2	2	2	2	2	2
8	2	2	2	2	2	2	2	2	2	2	2	2	2	2	2	2	2	2		2	2	2	2		2			2	2	2	2	2	2	2
9	2	2	2	2	2	2	2	2	2	2	2	2	2	2	2	2	2	2		2	2	2	2		2			2	2	2	2	2	2	2
10	3	3	3	3	3	3	3	3	3	3	3	3	3	3	3	3	3	3		3	3	3	3		3			3	3	3	3	3	3	3
11	3	3	3	3	3	3	3	3	3	3	3	3	3	3	3	3	3	3		3	3	3	3		3			3	3	3	3	3	3	3
12	3	3	3	3	3	3	3	3	3	3	3	3	3	3	3		3	3		3	3	3	3		3			3	3	3	3	3	3	3
13	3	3	3	3	3	3	3	3	3	3	3	3	3	3	3		3	3		3	3	3	3		3			3	3	3	3	3	3	3
14	4	4	4	4	4	4	4	4	4	4	4	4	4	4	4		4	4		4	4	4	4		4			4	4	4	4	4	4	4
15	4	4	4	4	4	4	4		4	4	4	4	4	4	4			4		4	4	4	4		4			4	4	4	4	4	4	4
16	4	4	4	4	4	4	4		4	4	4	4	4	4	4			4		4	4	4	4		4			4	4	4	4	4	4	4
17	4	4	4	4	4	4	4		4	4	4	4	4	4	4			4		4	4	4	4		4			4	4	4	4	4	4	4
18	5	5	5	5	5	5	5		5	5	5	5	5	5	5			5			5	5	5		5			5	5	5	5	5	5	5
19	5	5	5	5	5	5	5		5	5		5	5	5	5			5			5	5	5		5			5	5	5	5	5	5	5
20	5	5	5	5		5	5		5	5		5	5	5	5			5			5	5	5		5			5	5	5	5	5	5	5
21	5	5	5	5		5	5		5	5		5	5	5	5			5			5	5	5		5			5	5	5	5	5	5	5
22	6	6	6	6		6	6		6	6		6	6	6	6			6			6	6	6		6			6	6	6	6	6	6	6
23	6	6	6	6		6	6		6	6		6	6	6	6			6			6	6	6		6			6	6	6	6	6	6	6
24	6	6	6	6		6	6		6	6		6	6	6	6			6			6	6	6		6			6	6	6	6	6	6	6
25	6	6	6	6		6	6		6	6		6	6	6	6			6			6	6	6		6			6	6	6	6	6	6	6
26	7		7	7		7	7		7	7		7	7	7	7			7			7	7			7			7	7	7	7	7	7	7
27	7		7	7		7	7		7	7		7	7	7	7			7			7	7			7			7	7	7	7		7	7
28	7		7	7		7	7		7	7		7	7	7	7			7			7	7			7			7	7	7	7		7	7
29	7		7	7		7	7		7	7		7	7	7	7			7			7	7			7			7	7	7	7		7	7
30	8-4		8	8		8-5	8-3		8-3	8-1		8-2	8-3	8-4	8-4			8-3			8-5	8-3						8-3	8-2	8-1	8-4		8-3	8-4
31	8-4		8	8		8-5	8-3		8-3	8-1		8-2	8-3	8-4	8-4			8-3			8-5	8-3						8-3	8-2	8-1	8-4			8-4
32	8-4		8	8		8-5	8-3		8-3	8-1		8-2	8-3	8-4	8-4			8-3				8-3						8-3	8-2	8-1	8-4			8-4
33	8-4		8	8		8-5	8-3		8-3	8-1		8-2	8-3	8-4	8-4			8-3				8-3						8-3	8-2	8-1	8-4
34	9-3			9			9-4		9-5	9-2		9-3	9-4	9-1	9-5			9-5				9-1							9-1	9-2	9-1
35	9-3						9-4		9-5	9-2		9-3	9-4	9-1	9-5			9-5				9-1							9-1	9-2	9-1
36	9-3						9-4		9-5	9-2		9-3	9-4	9-1	9-5			9-5				9-1							9-1	9-2	9-1
37	9-3						9-4		9-5	9-2		9-3	9-4	9-1	9-5			9-5				9-1							9-1	9-2	9-1
38	10-5						10-5		10-2	10-3		10-4	10-1	10-3	10-2			10-1				10-5							10-4	10-3	10-2
39	10-5						10-5		10-2	10-3		10-4	10-1	10-3	10-2			10-1				10-5							10-4	10-3	10-2
40	10-5						10-5		10-2	10-3		10-4	10-1		10-2			10-1				10-5							10-4	10-3	10-2
41	10-5						10-5		10-2	10-3		10-4	10-1		10-2			10-1				10-5							10-4	10-3	10-2
42	11-1						11-1		11-1	11-5		11-5	11-2		11-3			11-2				11-2								11-4	11-5
43	11-1						11-1		11-1	11-5			11-2		11-3							11-2								11-4	11-5
44	11-1						11-1		11-1	11-5			11-2		11-3							11-2								11-4	11-5
45	11-1						11-1		11-1	11-5			11-2		11-3							11-2								11-4	11-5
46	12-2						12-2		12-4	12-4					12-1							12-4								12-5	12-3
47	12-2						12-2		12-4						12-1							12-4								12-5	12-3
48	12-2						12-2		12-4						12-1							12-4								12-5	12-3
49	12-2						12-2		12-4						12-1							12-4								12-5	12-3
verbal		R	L	L	R	L	L	L	R	L	R	L	R	R	R	R	R	R	R	L	L	L	L	L	R	R	L	R	L	L	L	R	R	R	L	L	R	R
	2017-02-23	2017-02-23	2017-03-02	2017-03-09	2017-03-09	2017-03-16	2017-03-20	2017-03-23	2017-03-26	2017-03-26	2017-03-30	2017-03-30	2017-04-02	2017-04-03	2017-04-06	2017-04-09	2017-04-10	2017-04-13	2017-04-17	2017-04-20	2017-04-23	2017-04-24	2017-04-27	2017-04-30	2017-04-30	2017-05-04	2017-05-04	2017-10-11	2017-10-12	2017-10-13	2017-10-13	2017-10-14	2017-10-14	2017-10-19	2017-10-23	2017-10-25	2017-11-08	2017-11-10	2017-04-09	2017-10-19	2017-10-19
	A#551478	A#551780	A#552696	A#552244	A#549468	A#553167	A#552237	A#552960	A#552970	A#553753	A#554106	A#552968	A#554856	A#553636 (either ends in 6 or 0, not sure)	A#554517	A#555011	A#553333	A#555698	A#554123	A#552840	A#555475	A#555472	A#550992	A#553332	A#555208	A#5522656	A#552658	A#566342	A#566335	A#565565	A#568217	A#564176	A#568639	A#568596	A#568957	A#568958	A#569979	A#569187	A#550990	A#568832	A#569051
trial	level
1	25 minute timeout	1-4	1-3	1-4	1-5	1-3	1-2	1-2	1-3	1-3	1-2	1-3	1-2	1-5	1-4	1-3	1-5	1-3	1-4	1-3	1-2	1-4	1-2	1-1	1-5	1-5	1-4	1-1	1-3	5 minute timeout; really shouldn't have tested her because I think she already knew targeting	1-4	1-4	1-5	1-5	1-2	1-4	1-4	1-3	did not touch	vomited	knew how to touch
2		1-5	1-2	1-2	1-3	1-5	1-1	1-3	1-4	1-5	1-4	1-1	1-4	1-2	1-3	1-2	1-3	1-2	1-1	1-4	1-1	1-3	1-5	1-4	1-4	1-2	1-5	1-4	1-5		1-3	1-3	1-3	1-3	1-3	1-5	1-3	1-1
3		1-1	1-1	1-1	1-1	1-2	1-3	1-4		1-2	1-3	1-5	1-3		1-5	1-5	1-4	1-1	1-5	1-2	1-3	1-1	1-1	1-5	1-3	1-3	1-2	1-2	1-1		1-1	1-1	1-4	1-1	1-1	1-2	1-1	1-4
4		1-3	1-5	1-3	1-4	1-4	1-5			1-1	1-1		1-5		1-2	1-4	1-1	1-5	1-2	1-5	1-5	1-5	1-4	1-2			1-1	1-5	1-4		1-2	1-5	1-2	1-2	1-4	1-3	1-5	1-5
5		1-2	1-4	1-5	1-2	1-1	1-4			1-4	1-5		1-1		1-1	1-1	1-2	1-4	1-3	1-1	1-4	1-2	1-3	1-3			1-3	1-3	1-2		1-5	1-2	1-1	1-4	1-5	1-1	1-2	1-2
6		2	2	2	2	2	2			2	2		2		2	2	2	2	2	2	2	2	2	2			2	2	2		2	2	2	2	2	2	2	2
7		2	2	2	2	2	2			2	2		2		2	2	2	2	2	2	2	2	2	2			2	2	2		2	2	2	2	2	2	2	2
8		2	2	2	2	2	2			2	2		2		2	2	2	2	2	2	2	2	2	2			2	2	2		2	2	2	2	2	2	2	2
9		2	2	2	2	2	2			2	2		2		2	2	2	2	2	2	2	2	2	2			2	2	2		2	2	2	2	2	2	2	2
10		3	3	3	3	3	3			3	3		3		3	3	3	3	3	3	3	3	3	3			3	3	3		3	3	3	3	3	3	3	3
11		3	3	3	3	3	3			3	3		3		3	3	3	3	3	3	3	3	3	3			3	3	3		3	3	3	3	3	3	3	3
12		3	3	3	3	3	3			3	3		3		3	3	3	3	3	3	3		3	3			3	3	3		3	3	3	3	3	3	3	3
13		3	3	3	3	3	3			3	3		3		3	3	3	3	3	3	3		3	3			3	3	3		3	3	3	3	3	3	3	3
14		4	4		4	4	4			4	4		4		4	4	4	4	4	4	4		4	4			4	4	4		4	4	4	4	4	4	4	4
15		4	4		4	4	4			4	4		4		4	4	4	4	4	4	4		4	4			4	4	4		4	4	4	4	4	4	4	4
16		4	4		4	4	4			4	4		4		4	4		4	4	4	4		4	4			4	4	4		4	4	4	4	4	4	4	4
17		4	4		4	4	4			4	4		4		4	4		4	4	4	4		4	4			4	4	4		4	4		4	4	4	4	4
18		5	5		5	5	5			5	5		5		5	5		5	5	5	5		5	5			5	5	5		5	5		5	5	5	5	5
19		5	5		5	5	5			5	5		5		5	5		5	5	5	5		5	5			5	5	5		5	5		5	5	5	5	5
20		5	5		5	5	5			5	5				5	5		5	5	5	5		5				5	5	5		5	5		5	5	5	5	5
21		5	5		5	5	5			5	5				5	5		5	5	5	5		5				5	5	5		5	5		5	5	5	5	5
22		6	6		6	6	6			6	6				6	6		6	6	6	6		6				6	6	6		6	6		6	6	6	6	6
23		6	6		6	6	6			6	6				6	6		6	6	6	6		6				6	6	6		6	6		6	6	6	6	6
24		6	6		6	6	6				6				6	6		6	6	6			6				6	6	6		6	6		6	6	6	6	6
25		6	6		6	6	6				6				6	6		6	6	6			6				6	6	6		6	6		6	6	6	6	6
26		7	7		7	7	7				7				7	7		7	7	7			7				7	7	7		7	7		7	7	7	7	7
27			7		7	7	7				7				7	7		7	7	7			7				7	7	7		7			7	7	7	7	7
28			7		7	7	7				7				7	7		7	7	7			7				7	7	7		7			7	7	7	7	7
29			7		7	7	7				7				7	7		7	7	7			7				7	7	7		7			7	7	7	7	7
30			8			8-3	8-3				8-5				8-3	8-1		8-1	8-1	8-3			8-1				8-1		8-4		8-5			8-4	8-2	8-4	8-1	8-1
31			8			8-3	8-3				8-5				8-3	8-1		8-1	8-1	8-3			8-1				8-1				8-5				8-2	8-4	8-1	8-1
32			8			8-3	8-3				8-5				8-3	8-1		8-1	8-1	8-3			8-1								8-5				8-2	8-4	8-1	8-1
33			8			8-3	8-3				8-5				8-3	8-1		8-1	8-1	8-3			8-1								8-5				8-2	8-4	8-1	8-1
34						9-4									9-1			9-5	9-2	9-5											9-3				9-5	9-2	9-3	9-5
35						9-4									9-1				9-2	9-5											9-3					9-2	9-3	9-5
36						9-4									9-1				9-2	9-5											9-3					9-2	9-3
37						9-4									9-1				9-2	9-5											9-3					9-2	9-3
38						10-1									10-4				10-5	10-2											10-2					10-3	10-5
39															10-4				10-5	10-2											10-2					10-3	10-5
40															10-4				10-5	10-2											10-2					10-3	10-5
41																			10-5	10-2											10-2					10-3	10-5
42																			11-3	11-4											11-4					11-5
43																				11-4											11-4					11-5
44																				11-4																11-5
45																				11-4																11-5
46																				12-1
47																				12-1
48																				12-1
49																				12-1
primary alone	R	R	R	L	L	L	R	R	L	R	L	L	R	R	L	L	L	L	R	R	L	R	L	R	R	L	R	R	R	L	L	R	L	L
	2017-02-23	2017-03-02	2017-03-09	2017-03-09	2017-03-16	2017-03-20	2017-03-23	2017-03-26	2017-03-26	2017-03-27	2017-03-30	2017-04-02	2017-04-03	2017-04-06	2017-04-09	2017-04-09	2017-04-13	2017-04-17	2017-04-20	2017-04-23	2017-04-23	2017-04-24	2017-04-27	2017-04-30	2017-05-04	2017-05-04	2017-10-12	2017-10-14	2017-10-14	2017-10-18	2017-10-21	2017-11-01	2017-11-03	2017-11-10	2017-04-02	2017-04-23	2017-10-13
	A#550782	A#552544	A#552246	A#551316	A#548848	A#552239	A#552959	A#552967	A#553752	A#551396	A#554444	A#554855	A#553627	A#549469	A#554843	A#553355	A#551789	A#555534	A#552842	A#555477	A#555473	A#553347	A#555389	A#555978	A#552657	A#552659	A#566337	A#569018	A#564175	A#566396	A#569256	A#569567	A#568235	A#569189	A#554800	A#553304	A#568217
trial	level
1	1-5	1-3	1-1	1-5	1-1	1-1	1-4	1-4	1-2	1-5	1-2	1-3	1-3	1-5	1-3	1-4	1-2	1-2	1-1	1-1	1-3	1-3	1-4	1-1	1-2	1-2	1-1	1-4	1-1	1-1	1-1	1-2	1-2	1-5	did not eat hot dog	did not touch	did not touch
2	1-4	1-4	1-3	1-1	1-2		1-1	1-3	1-1	1-2	1-4	1-5	1-5		1-5	1-1	1-1	1-3	1-3	1-5	1-4	1-4	1-2	1-4	1-5	1-4	1-3	1-5	1-4	1-3	1-5	1-4	1-5	1-3
3	1-1	1-5	1-4	1-3	1-5		1-2	1-5	1-5	1-4	1-3	1-2	1-4		1-1	1-5	1-3	1-1	1-4	1-3	1-1	1-2	1-1	1-2	1-1	1-5	1-2	1-2	1-2	1-5	1-4	1-3	1-4	1-2
4	1-2	1-1	1-2	1-4	1-4		1-5	1-1	1-4	1-1	1-1	1-1	1-2		1-2	1-2	1-4	1-5	1-2	1-2	1-5	1-5	1-5	1-5	1-4	1-1	1-5	1-3	1-3	1-4	1-2	1-1	1-1	1-1
5	1-3	1-2	1-5	1-2	1-3			1-2	1-3	1-3	1-5	1-4			1-4	1-3	1-5	1-4	1-5	1-4	1-2	1-1	1-3	1-3	1-3	1-3	1-4	1-1	1-5	1-2	1-3	1-5	1-3	1-4
6	2	2	2	2	2			2	2	2	2	2			2	2	2	2	2	2	2	2	2	2	2	2	2	2	2	2	2	2	2	2
7	2	2	2	2	2			2	2	2	2	2			2	2	2	2	2	2	2	2	2	2	2	2	2	2	2	2	2	2	2	2
8	2	2	2	2	2			2	2	2	2	2			2	2	2	2	2	2	2	2	2	2	2	2	2	2	2	2	2	2	2	2
9	2	2	2	2	2			2	2	2	2	2			2	2	2	2	2	2	2	2	2	2	2	2	2	2	2	2	2	2	2	2
10	3	3	3	3	3			3	3	3	3	3			3	3	3	3	3	3	3	3	3	3	3	3	3	3	3	3	3	3	3	3
11	3	3		3	3			3	3	3	3	3			3	3	3	3	3	3	3	3	3	3	3	3	3	3	3	3	3	3	3	3
12	3	3		3	3			3	3	3	3	3			3	3	3	3	3	3	3	3	3	3	3	3	3	3	3	3	3	3	3	3
13	3	3		3	3			3	3	3	3	3			3	3	3	3	3	3	3	3	3	3	3	3	3	3	3	3	3	3	3	3
14	4	4		4	4			4	4	4	4	4			4	4	4	4	4	4	4	4	4	4	4	4	4	4	4	4	4	4	4	4
15	4	4		4	4			4	4	4	4	4			4	4	4	4	4	4	4	4	4	4	4	4	4	4	4	4	4	4	4	4
16	4	4		4	4			4	4	4	4				4	4	4	4	4	4	4	4	4	4	4	4	4	4	4	4		4	4	4
17	4	4		4	4			4	4	4	4				4	4	4	4	4	4	4	4	4	4	4	4	4	4	4	4		4	4	4
18	5	5		5	5			5	5	5	5				5	5	5	5	5	5	5	5	5	5	5	5	5	5		5		5	5	5
19	5	5		5	5			5	5	5	5				5	5	5	5	5	5	5	5	5	5	5	5	5	5		5		5	5	5
20	5	5		5	5			5	5	5	5				5	5	5	5	5	5	5	5	5	5	5	5	5	5		5		5	5	5
21	5			5	5			5	5	5	5				5	5	5	5	5	5	5	5	5	5	5	5	5	5		5		5	5	5
22	6			6	6			6	6	6	6				6	6	6	6	6	6	6	6	6	6	6	6	6	6		6		6	6	6
23	6			6	6			6	6	6	6				6	6	6	6	6	6	6	6	6	6	6	6	6	6		6		6	6	6
24	6			6	6			6	6	6	6				6	6	6	6	6	6	6	6	6	6	6	6	6	6		6		6	6	6
25	6			6	6			6	6	6	6				6	6	6	6	6	6	6	6	6	6	6	6	6	6				6	6	6
26	7			7	7			7	7	7	7				7	7	7	7	7	7	7	7	7	7	7	7	7	7				7	7	7
27	7			7	7			7	7	7	7				7	7	7	7	7	7	7	7	7		7	7	7	7				7	7	7
28	7			7	7			7	7	7	7				7	7	7	7	7	7	7	7	7		7	7	7	7				7	7	7
29	7			7	7			7	7	7	7				7	7	7	7	7	7	7	7	7		7	7	7	7				7	7	7
30	8-4			8-3	8-4			8-4	8-2	8-2	8-4				8-4	8-1		8-4	8-3	8-2	8-4	8-5	8-3		8-1	8-4	8-3	8-1				8-3	8-2	8-2
31	8-4			8-3	8-4			8-4	8-2	8-2	8-4				8-4	8-1		8-4	8-3	8-2	8-4	8-5	8-3		8-1	8-4	8-3	8-1				8-3	8-2	8-2
32	8-4			8-3	8-4			8-4	8-2	8-2	8-4				8-4	8-1		8-4	8-3	8-2	8-4	8-5	8-3		8-1	8-4						8-3	8-2	8-2
33	8-4			8-3	8-4			8-4	8-2	8-2	8-4				8-4	8-1				8-2	8-4	8-5	8-3		8-1	8-4						8-3	8-2	8-2
34	9-5			9-1	9-3			9-5		9-5	9-5				9-5	9-2				9-5	9-2	9-1	9-1		9-3	9-2						9-2	9-1
35	9-5			9-1	9-3			9-5		9-5	9-5				9-5	9-2					9-2		9-1		9-3	9-2						9-2	9-1
36	9-5			9-1	9-3			9-5		9-5	9-5				9-5	9-2					9-2		9-1		9-3	9-2						9-2	9-1
37	9-5			9-1	9-3			9-5		9-5	9-5				9-5	9-2					9-2				9-3	9-2						9-2	9-1
38	10-1			10-4	10-5			10-3		10-3	10-1				10-1	10-3					10-5				10-4	10-3						10-4	10-4
39	10-1			10-4	10-5			10-3		10-3	10-1				10-1						10-5				10-4	10-3						10-4	10-4
40				10-4	10-5			10-3		10-3	10-1				10-1						10-5				10-4	10-3						10-4	10-4
41				10-4	10-5			10-3		10-3	10-1				10-1										10-4							10-4
42				11-5	11-1			11-2		11-4	11-2				11-2										11-5							11-1
43				11-5				11-2		11-4	11-2				11-2										11-5							11-1
44								11-2		11-4	11-2				11-2										11-5							11-1
45								11-2		11-4	11-2				11-2										11-5							11-1
46								12-1		12-1	12-3				12-3										12-2							12-5
47								12-1		12-1	12-3				12-3										12-2							12-5
48								12-1		12-1	12-3				12-3										12-2							12-5
49								12-1			12-3				12-3																	12-5

## Sheet: E3_primary alone_touches
Dog ID	A#554444	A#550782	A#553752	A#552246	A#552967	A#552544	A#551316	A#548848	A#551396	A#554843	A#554855	A#553355	A#551789	A#555534	A#552842	A#555477	A#555473	A#553347	A#555389	A#555978	A#552657	A#552659	A#566337	A#569018	A#564175	A#566396	A#569256	A#569567	A#568235	A#569189		averages
block majority color	yellow	blue	yellow	yellow	blue	yellow	yellow	yellow	blue	yellow	yellow	blue	yellow	yellow	blue	blue	blue	blue	yellow	blue	yellow	blue	yellow	yellow	yellow	blue	blue	blue	blue	blue
total touches (all)	139	154	85	52	203	114	168	61	139	143	81	126	79	119	108	107	119	168	101	77	179	113	78	78	51	62	55	169	127	98		111.767
total touches (all-1)	16	7	19	8	16	15	16	11	20	17	5	17	9	21	6	4	8	6	13	4	44	6	9	16	6	7	2	22	15	11		12.5333
total touches (all-2)	20	30	28	11	35	26	18	15	29	20	6	44	8	15	28	28	29	32	19	21	15	24	15	11	7	16	16	42	27	23		21.9333
total touches (all-3)	62	31	25	13	58	27	59	13	33	27	17	34	31	43	41	26	28	33	37	17	60	29	21	27	24	15	6	30	20	25		30.4
total touches (all-4)	26	53	6	12	71	30	46	11	46	45	24	24	19	22	27	41	35	78	19	24	21	29	20	14	11	20	22	50	46	32		30.8
total touches (all-5)	15	33	7	8	23	16	29	11	11	34	29	7	12	18	6	8	19	19	13	11	39	25	13	10	3	4	9	25	19	7		16.1
total touches (all-blue)	46	71	34	23	97	56	64	26	64	65	30	58	27	37	53	38	55	58	38	32	36	60	35	25	18	26	17	77	54	43		45.4333
total touches (all-yellow)	93	83	51	29	106	58	104	35	75	78	51	68	52	82	55	69	64	110	63	45	143	53	43	53	33	36	38	92	73	55		66.3333
total touches (all-left 2 [1/2])	36	37	47	19	51	41	34	26	49	37	11	61	17	36	34	32	37	38	32	25	59	30	24	27	13	23	18	64	42	34		34.4667
total touches (all-right 2 [4/5])	41	86	13	20	94	46	75	22	57	79	53	31	31	40	33	49	54	97	32	35	60	54	33	24	14	24	31	75	65	39		46.9
total touches (excluding X)	127	110	78	45	169	77	141	57	136	139	78	121	76	82	106	101	113	165	95	68	177	105	68	75	50	57	45	161	112	90		100.8
total touches (excluding X-1)	15	4	16	6	13	8	15	10	19	17	5	17	9	13	6	3	8	6	13	3	43	6	9	16	6	6	2	19	14	10		11.2333
total touches (excluding X-2)	19	22	26	8	31	18	15	13	29	20	6	41	7	10	27	26	27	32	19	19	15	24	14	10	7	15	12	41	24	20		19.9
total touches (excluding X-3)	53	20	25	12	44	17	47	13	32	27	16	33	29	30	41	25	27	32	36	16	59	25	16	26	23	14	4	29	18	23		27.0667
total touches (excluding X-4)	25	39	5	11	60	22	39	10	45	41	23	24	19	18	26	39	32	76	18	21	21	26	18	14	11	19	19	49	38	30		27.9333
total touches (excluding X-5)	15	25	6	8	21	12	25	11	11	34	28	6	12	11	6	8	19	19	9	9	39	24	11	9	3	3	8	23	18	7		14.6667
total touches (excluding X-blue)	44	49	31	19	78	40	54	23	62	61	29	56	26	28	53	36	54	57	37	28	36	55	32	24	18	23	14	71	50	40		40.9333
total touches (excluding X-yellow)	83	61	47	26	91	37	87	34	74	78	49	65	50	54	53	65	59	108	58	40	141	50	36	51	32	34	31	90	62	50		59.8667
total touches (excluding X-left 2 [1/2])	34	26	42	14	44	26	30	23	48	37	11	58	16	23	33	29	35	38	32	22	58	30	23	26	13	21	14	60	38	30		31.1333
total touches (excluding X-right 2 [4/5])	40	64	11	19	81	34	64	21	56	75	51	30	31	29	32	47	51	95	27	30	60	50	29	23	14	22	27	72	56	37		42.6
total touches (training)	27	26	11	43	36	52	31	17	15	28	45	17	19	24	45	26	23	19	16	23	33	32	20	22	24	22	24	23	16	17		25.8667
total touches (training-1)	3	4	2	6	4	6	3	3	2	5	4	4	5	4	4	2	1	2	2	1	8	1	3	3	6	2	2	3	2	4		3.36667
total touches (training-2)	2	7	3	8	10	16	3	5	3	2	5	3	2	4	15	7	8	4	3	9	7	4	3	3	6	8	10	6	3	6		5.83333
total touches (training-3)	11	5	3	10	4	11	13	2	3	7	10	3	7	7	14	6	4	3	8	6	8	7	6	6	9	4	3	5	2	3		6.33333
total touches (training-4)	4	6	2	11	13	12	6	2	6	9	10	3	2	5	10	8	6	8	1	6	3	10	5	5	2	7	4	6	8	2		6.06667
total touches (training-5)	7	4	1	8	5	7	6	5	1	5	16	4	3	4	2	3	4	2	2	1	7	10	3	5	1	1	5	3	1	2		4.26667
total touches (training excluding X)	27	15	11	38	31	43	27	14	13	27	43	13	18	19	44	21	18	18	16	23	32	26	19	20	24	21	24	19	15	12		23.0333
total touches (training excluding X-1)	3	2	2	4	3	4	3	2	2	5	4	3	5	4	4	2	1	2	2	1	7	1	3	3	6	2	2	2	2	3		2.96667
total touches (training excluding X-2)	2	4	3	6	8	12	3	3	3	2	5	1	2	4	14	5	6	4	3	9	7	4	3	2	6	7	10	5	3	3		4.96667
total touches (training excluding X-3)	11	3	3	10	3	9	12	2	2	7	9	2	6	5	14	5	4	3	8	6	8	5	5	6	9	4	3	5	2	2		5.76667
total touches (training excluding X-4)	4	4	2	10	12	11	4	2	5	8	9	3	2	3	10	6	3	7	1	6	3	7	5	5	2	7	4	5	7	2		5.3
total touches (training excluding X-5)	7	2	1	8	5	7	5	5	1	5	16	4	3	3	2	3	4	2	2	1	7	9	3	4	1	1	5	2	1	2		4.03333
total touches (level 1)	8	9	4	5	6	14	7	5	4	4	4	4	4	4	4	4	5	4	5	4	5	4	5	5	4	6	7	4	8	4		5.33333
total touches (level 1-1)	0	0	0	0	1	3	0	1	1	0	0	1	0	0	0	0	0	0	1	0	0	0	0	1	0	0	0	0	0	0		0.3
total touches (level 1-2)	2	3	1	1	1	2	0	1	1	0	0	1	0	0	0	0	1	0	0	1	0	1	0	1	0	0	0	0	1	4		0.733333
total touches (level 1-3)	6	3	2	3	4	3	2	1	0	0	1	1	3	3	2	1	1	3	3	1	3	2	3	3	3	2	0	2	1	0		2.06667
total touches (level 1-4)	0	3	0	1	0	5	5	1	2	1	1	1	1	0	2	3	2	1	1	1	0	0	1	0	1	4	7	2	5	0		1.7
total touches (level 1-5)	0	0	1	0	0	1	0	1	0	3	2	0	0	1	0	0	1	0	0	1	2	1	1	0	0	0	0	0	1	0		0.533333
total touches (level 1 excluding X)	4	4	4	4	4	4	4	4	4	4	4	4	4	4	4	4	4	4	4	4	4	4	4	4	4	4	4	4	4	4		4
total touches (level 1 excluding X-1)	0	0	0	0	0	1	0	1	1	0	0	1	0	0	0	0	0	0	1	0	0	0	0	1	0	0	0	0	0	0		0.2
total touches (level 1 excluding X-2)	1	1	1	1	1	1	0	1	1	0	0	1	0	0	0	0	1	0	0	1	0	1	0	1	0	0	0	0	1	4		0.6
total touches (level 1 excluding X-3)	3	1	2	2	3	1	1	1	0	0	1	1	3	3	2	1	0	3	3	1	2	2	2	2	3	1	0	2	1	0		1.56667
total touches (level 1 excluding X-4)	0	2	0	1	0	1	3	0	2	1	1	1	1	0	2	3	2	1	0	1	0	0	1	0	1	3	4	2	2	0		1.16667
total touches (level 1 excluding X-5)	0	0	1	0	0	0	0	1	0	3	2	0	0	1	0	0	1	0	0	1	2	1	1	0	0	0	0	0	0	0		0.466667
total touches (level 2)	7	8	4	4	8	15	6	9	4	5	5	4	4	10	4	4	6	5	5	7	6	6	7	6	4	4	5	4	5	6		5.9
total touches (level 2-1)	0	0	0	2	0	1	0	3	0	0	0	0	0	2	0	0	0	0	1	0	0	0	0	2	0	0	0	0	0	1		0.4
total touches (level 2-2)	0	2	0	2	0	3	0	0	1	0	0	4	1	1	1	2	1	1	1	0	0	1	1	0	0	0	0	2	1	2		0.9
total touches (level 2-3)	7	4	4	0	3	5	2	1	3	1	1	0	2	2	3	1	2	1	3	2	3	1	2	2	2	0	0	1	1	1		2
total touches (level 2-4)	0	2	0	0	5	4	4	3	0	4	3	0	1	3	0	1	2	2	0	3	1	3	2	2	2	4	4	1	3	2		2.03333
total touches (level 2-5)	0	0	0	0	0	2	0	2	0	0	1	0	0	2	0	0	1	1	0	2	2	1	2	0	0	0	1	0	0	0		0.566667
total touches (level 2 excluding X)	4	4	4	3	4	6	4	9	4	4	4	4	4	6	4	4	6	5	5	6	6	5	6	6	4	4	5	4	4	5		4.76667
total touches (level 2 excluding X-1)	0	0	0	2	0	1	0	3	0	0	0	0	0	1	0	0	0	0	1	0	0	0	0	2	0	0	0	0	0	1		0.366667
total touches (level 2 excluding X-2)	0	1	0	1	0	1	0	0	1	0	0	4	1	1	1	2	1	1	1	0	0	1	1	0	0	0	0	2	1	2		0.766667
total touches (level 2 excluding X-3)	4	2	4	0	1	2	1	1	3	1	1	0	2	0	3	1	2	1	3	1	3	0	1	2	2	0	0	1	1	1		1.46667
total touches (level 2 excluding X-4)	0	1	0	0	3	2	3	3	0	3	3	0	1	3	0	1	2	2	0	3	1	3	2	2	2	4	4	1	2	1		1.73333
total touches (level 2 excluding X-5)	0	0	0	0	0	0	0	2	0	0	0	0	0	1	0	0	1	1	0	2	2	1	2	0	0	0	1	0	0	0		0.433333
total touches (level 3)	9	10	11		17	16	28	9	6	16	27	10	10	24	10	10	20	8	13	5	16	9	10	13	9	13	19	6	15	20		13.4138
total touches (level 3-1)	4	0	2		2	4	2	0	0	0	1	0	1	4	1	0	1	0	0	1	4	0	1	1	0	1	0	0	1	2		1.13793
total touches (level 3-2)	1	1	3		2	3	5	4	1	4	1	5	4	5	2	2	3	3	4	0	0	4	1	2	1	4	6	0	3	2		2.62069
total touches (level 3-3)	4	2	5		9	3	11	2	1	4	5	3	4	9	2	4	5	1	8	0	8	1	3	6	4	5	3	2	2	7		4.24138
total touches (level 3-4)	0	3	0		4	4	5	2	4	3	10	2	1	4	5	4	6	4	1	4	3	2	4	3	4	2	7	4	6	7		3.72414
total touches (level 3-5)	0	4	1		0	2	5	1	0	5	10	0	0	2	0	0	5	0	0	0	1	2	1	1	0	1	3	0	3	2		1.68966
total touches (level 3 excluding X)	8	7	10		14	8	23	9	6	16	27	9	9	15	9	10	20	8	12	5	16	9	9	13	9	12	12	6	15	20		11.931
total touches (level 3 excluding X-1)	3	0	1		2	1	1	0	0	0	1	0	1	2	1	0	1	0	0	1	4	0	1	1	0	0	0	0	1	2		0.827586
total touches (level 3 excluding X-2)	1	1	3		2	2	3	4	1	4	1	4	3	2	2	2	3	3	4	0	0	4	1	2	1	4	2	0	3	2		2.2069
total touches (level 3 excluding X-3)	4	2	5		6	1	9	2	1	4	5	3	4	6	2	4	5	1	7	0	8	1	3	6	4	5	1	2	2	7		3.7931
total touches (level 3 excluding X-4)	0	2	0		4	3	5	2	4	3	10	2	1	3	4	4	6	4	1	4	3	2	4	3	4	2	7	4	6	7		3.58621
total touches (level 3 excluding X-5)	0	2	1		0	1	5	1	0	5	10	0	0	2	0	0	5	0	0	0	1	2	0	1	0	1	2	0	3	2		1.51724
total touches (level 4)	24	19	18		25	17	15	20	16	12		15	8	14	20	11	9	14	14	12	10	13	12	7	10	12		13	6	11		13.963
total touches (level 4-1)	4	0	3		0	1	3	4	2	2		1	0	2	1	0	0	1	0	1	4	3	1	3	0	3		0	0	1		1.48148
total touches (level 4-2)	5	6	5		4	2	3	5	2	3		6	1	1	3	4	3	3	3	5	0	3	4	1	0	2		4	1	2		3
total touches (level 4-3)	10	3	5		5	5	3	7	4	3		4	3	6	9	0	2	4	3	3	3	3	4	1	6	2		3	0	3		3.85185
total touches (level 4-4)	5	7	4		11	5	4	3	6	3		4	1	2	4	6	3	5	2	2	0	2	1	1	2	3		5	5	5		3.74074
total touches (level 4-5)	0	3	1		5	4	2	1	2	1		0	3	3	3	1	1	1	6	1	3	2	2	1	2	2		1	0	0		1.88889
total touches (level 4 excluding X)	23	16	17		25	16	13	20	16	12		15	8	10	20	11	9	14	10	9	10	13	8	7	9	11		13	5	10		12.963
total touches (level 4 excluding X-1)	4	0	3		0	1	3	4	2	2		1	0	2	1	0	0	1	0	0	4	3	1	3	0	3		0	0	1		1.44444
total touches (level 4 excluding X-2)	5	4	5		4	2	3	5	2	3		6	1	1	3	4	3	3	3	4	0	3	3	1	0	2		4	1	2		2.85185
total touches (level 4 excluding X-3)	10	2	5		5	4	3	7	4	3		4	3	3	9	0	2	4	3	3	3	3	2	1	5	2		3	0	3		3.55556
total touches (level 4 excluding X-4)	4	7	3		11	5	3	3	6	3		4	1	2	4	6	3	5	2	1	0	2	1	1	2	3		5	4	4		3.51852
total touches (level 4 excluding X-5)	0	3	1		5	4	1	1	2	1		0	3	2	3	1	1	1	2	1	3	2	1	1	2	1		1	0	0		1.59259
total touches (level 5)	7	14	6		10		11	1	7	7		6	7	7	9	8	5	20	8	13	4	8	10	5		5		13	11	10		8.48
total touches (level 5-1)	0	0	3		0		0	0	4	0		0	0	2	0	1	0	0	1	0	3	0	2	2		1		4	2	0		1
total touches (level 5-2)	0	3	0		2		1	0	3	0		0	0	1	5	1	0	6	0	5	0	3	4	1		2		3	6	2		1.92
total touches (level 5-3)	7	3	1		5		3	0	0	1		4	4	2	4	3	4	1	2	2	0	3	1	2		2		0	1	4		2.36
total touches (level 5-4)	0	3	0		3		2	0	0	2		2	2	1	0	2	1	10	4	4	0	1	2	0		0		4	1	3		1.88
total touches (level 5-5)	0	5	2		0		5	1	0	4		0	1	1	0	1	0	3	1	2	1	1	1	0		0		2	1	1		1.32
total touches (level 5 excluding X)	4	8	4		9		7	1	7	7		6	6	5	9	7	5	19	8	11	4	8	9	5		5		11	10	9		7.36
total touches (level 5 excluding X-1)	0	0	2		0		0	0	4	0		0	0	1	0	0	0	0	1	0	3	0	2	2		1		2	2	0		0.8
total touches (level 5 excluding X-2)	0	3	0		2		0	0	3	0		0	0	1	5	1	0	6	0	4	0	3	4	1		2		3	5	2		1.8
total touches (level 5 excluding X-3)	4	1	1		4		2	0	0	1		4	3	2	4	3	4	1	2	2	0	3	1	2		2		0	1	3		2
total touches (level 5 excluding X-4)	0	1	0		3		2	0	0	2		2	2	0	0	2	1	9	4	3	0	1	1	0		0		4	1	3		1.64
total touches (level 5 excluding X-5)	0	3	1		0		3	1	0	4		0	1	1	0	1	0	3	1	2	1	1	1	0		0		2	1	1		1.12
total touches (level 6)	10	8	8		14		11		8	6		6	8	17	9	6	7	5	10	13	28	6	8	11				7	9	6		9.6087
total touches (level 6-1)	0	0	1		2		0		3	0		0	0	3	0	0	0	0	4	1	6	0	0	2				0	1	0		1
total touches (level 6-2)	2	0	6		2		0		3	0		0	0	0	1	1	2	1	1	1	1	1	1	2				2	1	1		1.26087
total touches (level 6-3)	6	0	1		3		6		1	0		2	3	7	4	2	2	0	2	3	10	1	0	3				1	3	2		2.69565
total touches (level 6-4)	2	8	0		6		4		1	5		4	4	4	4	3	2	3	3	4	3	3	4	2				2	4	3		3.3913
total touches (level 6-5)	0	0	0		1		1		0	1		0	1	3	0	0	1	1	0	4	8	1	3	2				2	0	0		1.26087
total touches (level 6 excluding X)	10	4	6		9		11		8	5		6	8	11	9	6	7	5	10	10	28	6	7	11				6	8	6		8.56522
total touches (level 6 excluding X-1)	0	0	1		2		0		3	0		0	0	2	0	0	0	0	4	1	6	0	0	2				0	1	0		0.956522
total touches (level 6 excluding X-2)	2	0	4		2		0		3	0		0	0	0	1	1	2	1	1	1	1	1	1	2				2	1	1		1.17391
total touches (level 6 excluding X-3)	6	0	1		3		6		1	0		2	3	5	4	2	2	0	2	3	10	1	0	3				1	3	2		2.6087
total touches (level 6 excluding X-4)	2	4	0		2		4		1	4		4	4	4	4	3	2	3	3	3	3	3	3	2				2	3	3		2.86957
total touches (level 6 excluding X-5)	0	0	0		0		1		0	1		0	1	0	0	0	1	1	0	2	8	1	3	2				1	0	0		0.956522
total touches (level 7)	8	15	13		18		17		10	5		37	19	19	7	14	12	14	15		12	12	6	9				40	29	16		15.7727
total touches (level 7-1)	0	0	5		2		2		2	0		4	3	4	0	0	2	2	1		4	1	2	2				3	1	1		1.86364
total touches (level 7-2)	0	2	4		4		1		4	0		12	0	3	1	4	2	2	6		2	1	1	1				8	4	4		3
total touches (level 7-3)	4	5	3		3		7		1	0		13	5	7	3	3	2	0	4		4	4	2	4				4	6	4		4
total touches (level 7-4)	4	7	0		8		4		3	5		6	7	3	2	5	4	6	3		0	4	1	1				14	8	5		4.54545
total touches (level 7-5)	0	1	1		1		3		0	0		2	4	2	1	2	2	4	1		2	2	0	1				11	10	2		2.36364
total touches (level 7 excluding X)	8	11	12		14		14		9	4		37	19	12	7	14	12	14	15		12	11	6	9				40	26	16		14.6364
total touches (level 7 excluding X-1)	0	0	4		2		2		1	0		4	3	1	0	0	2	2	1		4	1	2	2				3	0	1		1.59091
total touches (level 7 excluding X-2)	0	2	4		4		1		4	0		12	0	1	1	4	2	2	6		2	1	1	1				8	4	4		2.90909
total touches (level 7 excluding X-3)	4	4	3		3		4		1	0		13	5	6	3	3	2	0	4		4	3	2	4				4	4	4		3.63636
total touches (level 7 excluding X-4)	4	4	0		4		4		3	4		6	7	3	2	5	4	6	3		0	4	1	1				14	8	5		4.18182
total touches (level 7 excluding X-5)	0	1	1		1		3		0	0		2	4	1	1	2	2	4	1		2	2	0	1				11	10	2		2.31818
total touches (level 8)	10	13	10		14		21		24	8		12				24	12	79	15		8	16						11	15	8		17.6471
total touches (level 8-1)	0	0	3		0		4		3	0		3				1	0	1	3		2	1						0	4	2		1.58824
total touches (level 8-2)	0	0	6		0		2		3	0		4				7	4	12	1		1	4						4	4	0		3.05882
total touches (level 8-3)	1	1	1		3		8		6	1		3				6	4	20	4		4	4						4	3	1		4.35294
total touches (level 8-4)	5	6	0		6		4		8	3		2				9	3	39	4		0	2						3	2	5		5.94118
total touches (level 8-5)	4	6	0		5		3		4	4		0				1	1	7	3		1	5						0	2	0		2.70588
total touches (level 8 excluding X)	10	10	10		13		19		24	8		12				24	12	78	15		8	16						10	13	8		17.0588
total touches (level 8 excluding X-1)	0	0	3		0		4		3	0		3				1	0	1	3		2	1						0	4	2		1.58824
total touches (level 8 excluding X-2)	0	0	6		0		2		3	0		4				7	4	12	1		1	4						4	2	0		2.94118
total touches (level 8 excluding X-3)	1	0	1		3		6		6	1		3				6	4	19	4		4	4						3	3	1		4.05882
total touches (level 8 excluding X-4)	5	6	0		6		4		8	3		2				9	3	39	4		0	2						3	2	5		5.94118
total touches (level 8 excluding X-5)	4	4	0		4		3		4	4		0				1	1	7	3		1	5						0	2	0		2.52941
total touches (level 9)	17	32			18		12		11	22		15					20				12	7						21	13			16.6667
total touches (level 9-1)	4	3			0		2		0	4		5					4				1	0						6	4			2.75
total touches (level 9-2)	1	6			0		3		1	2		9					5				1	2						6	3			3.25
total touches (level 9-3)	2	5			7		1		4	4		1					2				5	3						4	1			3.25
total touches (level 9-4)	6	8			5		4		5	6		0					6				4	2						4	4			4.5
total touches (level 9-5)	4	10			6		2		1	6		0					3				1	0						1	1			2.91667
total touches (level 9 excluding X)	17	31			15		12		11	22		15					20				12	7						21	12			16.25
total touches (level 9 excluding X-1)	4	2			0		2		0	4		5					4				1	0						6	4			2.66667
total touches (level 9 excluding X-2)	1	6			0		3		1	2		9					5				1	2						6	3			3.25
total touches (level 9 excluding X-3)	2	5			4		1		4	4		1					2				5	3						4	1			3
total touches (level 9 excluding X-4)	6	8			5		4		5	6		0					6				4	2						4	3			4.41667
total touches (level 9 excluding X-5)	4	10			6		2		1	6		0					3				1	0						1	1			2.91667
total touches (level 10)	4				18		9		7	15											11							15				11.2857
total touches (level 10-1)	0				1		0		0	4											2							4				1.57143
total touches (level 10-2)	4				4		0		1	4											0							5				2.57143
total touches (level 10-3)	0				7		3		1	2											2							2				2.42857
total touches (level 10-4)	0				6		4		4	2											3							3				3.14286
total touches (level 10-5)	0				0		2		1	3											4							1				1.57143
total touches (level 10 excluding X)	4				16		7		7	15											11							15				10.7143
total touches (level 10 excluding X-1)	0				0		0		0	4											2							4				1.42857
total touches (level 10 excluding X-2)	4				4		0		1	4											0							5				2.57143
total touches (level 10 excluding X-3)	0				6		2		1	2											2							2				2.14286
total touches (level 10 excluding X-4)	0				6		3		4	2											3							3				3
total touches (level 10 excluding X-5)	0				0		2		1	3											4							1				1.57143
total touches (level 11)	8				19				27	15											34							12				19.1667
total touches (level 11-1)	1				4				3	2											10							2				3.66667
total touches (level 11-2)	3				6				6	5											3							2				4.16667
total touches (level 11-3)	4				5				9	4											10							2				5.66667
total touches (level 11-4)	0				4				7	2											4							2				3.16667
total touches (level 11-5)	0				0				2	2											7							4				2.5
total touches (level 11 excluding X)	8				15				27	15											34							12				18.5
total touches (level 11 excluding X-1)	1				4				3	2											10							2				3.66667
total touches (level 11 excluding X-2)	3				4				6	5											3							2				3.83333
total touches (level 11 excluding X-3)	4				3				9	4											10							2				5.33333
total touches (level 11 excluding X-4)	0				4				7	2											4							2				3.16667
total touches (level 11 excluding X-5)	0				0				2	2											7							4				2.5
Dog ID
block color
total touches (all)
total touches (all-1)
total touches (all-2)
total touches (all-3)
total touches (all-4)
total touches (all-5)
total touches (all-blue)
total touches (all-yellow)
total touches (all-left 2 [1/2])
total touches (all-right 2 [4/5])
total touches (excluding X)
total touches (excluding X-1)
total touches (excluding X-2)
total touches (excluding X-3)
total touches (excluding X-4)
total touches (excluding X-5)
total touches (excluding X-blue)
total touches (excluding X-yellow)
total touches (excluding X-left 2 [1/2])
total touches (excluding X-right 2 [4/5])
total touches (training)
total touches (training-1)
total touches (training-2)
total touches (training-3)
total touches (training-4)
total touches (training-5)
total touches (training excluding X)
total touches (training excluding X-1)
total touches (training excluding X-2)
total touches (training excluding X-3)
total touches (training excluding X-4)
total touches (training excluding X-5)
Dog ID
block color
total touches (all)
total touches (all-1)
total touches (all-2)
total touches (all-3)
total touches (all-4)
total touches (all-5)
total touches (all-blue)
total touches (all-yellow)
total touches (all-left 2 [1/2])
total touches (all-right 2 [4/5])
total touches (excluding X)
total touches (excluding X-1)
total touches (excluding X-2)
total touches (excluding X-3)
total touches (excluding X-4)
total touches (excluding X-5)
total touches (excluding X-blue)
total touches (excluding X-yellow)
total touches (excluding X-left 2 [1/2])
total touches (excluding X-right 2 [4/5])
total touches (training)
total touches (training-1)
total touches (training-2)
total touches (training-3)
total touches (training-4)
total touches (training-5)
total touches (training excluding X)
total touches (training excluding X-1)
total touches (training excluding X-2)
total touches (training excluding X-3)
total touches (training excluding X-4)
total touches (training excluding X-5)
Dog ID
block color
total touches (all)
total touches (all-1)
total touches (all-2)
total touches (all-3)
total touches (all-4)
total touches (all-5)
total touches (all-blue)
total touches (all-yellow)
total touches (all-left 2 [1/2])
total touches (all-right 2 [4/5])
total touches (excluding X)
total touches (excluding X-1)
total touches (excluding X-2)
total touches (excluding X-3)
total touches (excluding X-4)
total touches (excluding X-5)
total touches (excluding X-blue)
total touches (excluding X-yellow)
total touches (excluding X-left 2 [1/2])
total touches (excluding X-right 2 [4/5])
total touches (training)
total touches (training-1)
total touches (training-2)
total touches (training-3)
total touches (training-4)
total touches (training-5)
total touches (training excluding X)
total touches (training excluding X-1)
total touches (training excluding X-2)
total touches (training excluding X-3)
total touches (training excluding X-4)
total touches (training excluding X-5)
Dog ID
block color
total touches (all)
total touches (all-1)
total touches (all-2)
total touches (all-3)
total touches (all-4)
total touches (all-5)
total touches (all-blue)
total touches (all-yellow)
total touches (all-left 2 [1/2])
total touches (all-right 2 [4/5])
total touches (excluding X)
total touches (excluding X-1)
total touches (excluding X-2)
total touches (excluding X-3)
total touches (excluding X-4)
total touches (excluding X-5)
total touches (excluding X-blue)
total touches (excluding X-yellow)
total touches (excluding X-left 2 [1/2])
total touches (excluding X-right 2 [4/5])
total touches (training)
total touches (training-1)
total touches (training-2)
total touches (training-3)
total touches (training-4)
total touches (training-5)
total touches (training excluding X)
total touches (training excluding X-1)
total touches (training excluding X-2)
total touches (training excluding X-3)
total touches (training excluding X-4)
total touches (training excluding X-5)
Dog ID
block color
total touches (all)
total touches (all-1)
total touches (all-2)
total touches (all-3)
total touches (all-4)
total touches (all-5)
total touches (all-blue)
total touches (all-yellow)
total touches (all-left 2 [1/2])
total touches (all-right 2 [4/5])
total touches (excluding X)
total touches (excluding X-1)
total touches (excluding X-2)
total touches (excluding X-3)
total touches (excluding X-4)
total touches (excluding X-5)
total touches (excluding X-blue)
total touches (excluding X-yellow)
total touches (excluding X-left 2 [1/2])
total touches (excluding X-right 2 [4/5])
total touches (training)
total touches (training-1)
total touches (training-2)
total touches (training-3)
total touches (training-4)
total touches (training-5)
total touches (training excluding X)
total touches (training excluding X-1)
total touches (training excluding X-2)
total touches (training excluding X-3)
total touches (training excluding X-4)
total touches (training excluding X-5)
Dog ID
block color
total touches (all)
total touches (all-1)
total touches (all-2)
total touches (all-3)
total touches (all-4)
total touches (all-5)
total touches (all-blue)
total touches (all-yellow)
total touches (all-left 2 [1/2])
total touches (all-right 2 [4/5])
total touches (excluding X)
total touches (excluding X-1)
total touches (excluding X-2)
total touches (excluding X-3)
total touches (excluding X-4)
total touches (excluding X-5)
total touches (excluding X-blue)
total touches (excluding X-yellow)
total touches (excluding X-left 2 [1/2])
total touches (excluding X-right 2 [4/5])
total touches (training)
total touches (training-1)
total touches (training-2)
total touches (training-3)
total touches (training-4)
total touches (training-5)
total touches (training excluding X)
total touches (training excluding X-1)
total touches (training excluding X-2)
total touches (training excluding X-3)
total touches (training excluding X-4)
total touches (training excluding X-5)
Dog ID
block color
total touches (all)
total touches (all-1)
total touches (all-2)
total touches (all-3)
total touches (all-4)
total touches (all-5)
total touches (all-blue)
total touches (all-yellow)
total touches (all-left 2 [1/2])
total touches (all-right 2 [4/5])
total touches (excluding X)
total touches (excluding X-1)
total touches (excluding X-2)
total touches (excluding X-3)
total touches (excluding X-4)
total touches (excluding X-5)
total touches (excluding X-blue)
total touches (excluding X-yellow)
total touches (excluding X-left 2 [1/2])
total touches (excluding X-right 2 [4/5])
total touches (training)
total touches (training-1)
total touches (training-2)
total touches (training-3)
total touches (training-4)
total touches (training-5)
total touches (training excluding X)
total touches (training excluding X-1)
total touches (training excluding X-2)
total touches (training excluding X-3)
total touches (training excluding X-4)
total touches (training excluding X-5)
Dog ID
block color
total touches (all)
total touches (all-1)
total touches (all-2)
total touches (all-3)
total touches (all-4)
total touches (all-5)
total touches (all-blue)
total touches (all-yellow)
total touches (all-left 2 [1/2])
total touches (all-right 2 [4/5])
total touches (excluding X)
total touches (excluding X-1)
total touches (excluding X-2)
total touches (excluding X-3)
total touches (excluding X-4)
total touches (excluding X-5)
total touches (excluding X-blue)
total touches (excluding X-yellow)
total touches (excluding X-left 2 [1/2])
total touches (excluding X-right 2 [4/5])
total touches (training)
total touches (training-1)
total touches (training-2)
total touches (training-3)
total touches (training-4)
total touches (training-5)
total touches (training excluding X)
total touches (training excluding X-1)
total touches (training excluding X-2)
total touches (training excluding X-3)
total touches (training excluding X-4)
total touches (training excluding X-5)
Dog ID
block color
total touches (all)
total touches (all-1)
total touches (all-2)
total touches (all-3)
total touches (all-4)
total touches (all-5)
total touches (all-blue)
total touches (all-yellow)
total touches (all-left 2 [1/2])
total touches (all-right 2 [4/5])
total touches (excluding X)
total touches (excluding X-1)
total touches (excluding X-2)
total touches (excluding X-3)
total touches (excluding X-4)
total touches (excluding X-5)
total touches (excluding X-blue)
total touches (excluding X-yellow)
total touches (excluding X-left 2 [1/2])
total touches (excluding X-right 2 [4/5])
total touches (training)
total touches (training-1)
total touches (training-2)
total touches (training-3)
total touches (training-4)
total touches (training-5)
total touches (training excluding X)
total touches (training excluding X-1)
total touches (training excluding X-2)
total touches (training excluding X-3)
total touches (training excluding X-4)
total touches (training excluding X-5)
Dog ID
block color
total touches (all)
total touches (all-1)
total touches (all-2)
total touches (all-3)
total touches (all-4)
total touches (all-5)
total touches (all-blue)
total touches (all-yellow)
total touches (all-left 2 [1/2])
total touches (all-right 2 [4/5])
total touches (excluding X)
total touches (excluding X-1)
total touches (excluding X-2)
total touches (excluding X-3)
total touches (excluding X-4)
total touches (excluding X-5)
total touches (excluding X-blue)
total touches (excluding X-yellow)
total touches (excluding X-left 2 [1/2])
total touches (excluding X-right 2 [4/5])
total touches (training)
total touches (training-1)
total touches (training-2)
total touches (training-3)
total touches (training-4)
total touches (training-5)
total touches (training excluding X)
total touches (training excluding X-1)
total touches (training excluding X-2)
total touches (training excluding X-3)
total touches (training excluding X-4)
total touches (training excluding X-5)
Dog ID
block color
total touches (all)
total touches (all-1)
total touches (all-2)
total touches (all-3)
total touches (all-4)
total touches (all-5)
total touches (all-blue)
total touches (all-yellow)
total touches (all-left 2 [1/2])
total touches (all-right 2 [4/5])
total touches (excluding X)
total touches (excluding X-1)
total touches (excluding X-2)
total touches (excluding X-3)
total touches (excluding X-4)
total touches (excluding X-5)
total touches (excluding X-blue)
total touches (excluding X-yellow)
total touches (excluding X-left 2 [1/2])
total touches (excluding X-right 2 [4/5])
total touches (training)
total touches (training-1)
total touches (training-2)
total touches (training-3)
total touches (training-4)
total touches (training-5)
total touches (training excluding X)
total touches (training excluding X-1)
total touches (training excluding X-2)
total touches (training excluding X-3)
total touches (training excluding X-4)
total touches (training excluding X-5)
Dog ID
block color
total touches (all)
total touches (all-1)
total touches (all-2)
total touches (all-3)
total touches (all-4)
total touches (all-5)
total touches (all-blue)
total touches (all-yellow)
total touches (all-left 2 [1/2])
total touches (all-right 2 [4/5])
total touches (excluding X)
total touches (excluding X-1)
total touches (excluding X-2)
total touches (excluding X-3)
total touches (excluding X-4)
total touches (excluding X-5)
total touches (excluding X-blue)
total touches (excluding X-yellow)
total touches (excluding X-left 2 [1/2])
total touches (excluding X-right 2 [4/5])
total touches (training)
total touches (training-1)
total touches (training-2)
total touches (training-3)
total touches (training-4)
total touches (training-5)
total touches (training excluding X)
total touches (training excluding X-1)
total touches (training excluding X-2)
total touches (training excluding X-3)
total touches (training excluding X-4)
total touches (training excluding X-5)
Dog ID
block color
total touches (all)
total touches (all-1)
total touches (all-2)
total touches (all-3)
total touches (all-4)
total touches (all-5)
total touches (all-blue)
total touches (all-yellow)
total touches (all-left 2 [1/2])
total touches (all-right 2 [4/5])
total touches (excluding X)
total touches (excluding X-1)
total touches (excluding X-2)
total touches (excluding X-3)
total touches (excluding X-4)
total touches (excluding X-5)
total touches (excluding X-blue)
total touches (excluding X-yellow)
total touches (excluding X-left 2 [1/2])
total touches (excluding X-right 2 [4/5])
total touches (training)
total touches (training-1)
total touches (training-2)
total touches (training-3)
total touches (training-4)
total touches (training-5)
total touches (training excluding X)
total touches (training excluding X-1)
total touches (training excluding X-2)
total touches (training excluding X-3)
total touches (training excluding X-4)
total touches (training excluding X-5)
Dog ID
block color
total touches (all)
total touches (all-1)
total touches (all-2)
total touches (all-3)
total touches (all-4)
total touches (all-5)
total touches (all-blue)
total touches (all-yellow)
total touches (all-left 2 [1/2])
total touches (all-right 2 [4/5])
total touches (excluding X)
total touches (excluding X-1)
total touches (excluding X-2)
total touches (excluding X-3)
total touches (excluding X-4)
total touches (excluding X-5)
total touches (excluding X-blue)
total touches (excluding X-yellow)
total touches (excluding X-left 2 [1/2])
total touches (excluding X-right 2 [4/5])
total touches (training)
total touches (training-1)
total touches (training-2)
total touches (training-3)
total touches (training-4)
total touches (training-5)
total touches (training excluding X)
total touches (training excluding X-1)
total touches (training excluding X-2)
total touches (training excluding X-3)
total touches (training excluding X-4)
total touches (training excluding X-5)
Dog ID
block color
total touches (all)
total touches (all-1)
total touches (all-2)
total touches (all-3)
total touches (all-4)
total touches (all-5)
total touches (all-blue)
total touches (all-yellow)
total touches (all-left 2 [1/2])
total touches (all-right 2 [4/5])
total touches (excluding X)
total touches (excluding X-1)
total touches (excluding X-2)
total touches (excluding X-3)
total touches (excluding X-4)
total touches (excluding X-5)
total touches (excluding X-blue)
total touches (excluding X-yellow)
total touches (excluding X-left 2 [1/2])
total touches (excluding X-right 2 [4/5])
total touches (training)
total touches (training-1)
total touches (training-2)
total touches (training-3)
total touches (training-4)
total touches (training-5)
total touches (training excluding X)
total touches (training excluding X-1)
total touches (training excluding X-2)
total touches (training excluding X-3)
total touches (training excluding X-4)
total touches (training excluding X-5)
Dog ID
block color
total touches (all)
total touches (all-1)
total touches (all-2)
total touches (all-3)
total touches (all-4)
total touches (all-5)
total touches (all-blue)
total touches (all-yellow)
total touches (all-left 2 [1/2])
total touches (all-right 2 [4/5])
total touches (excluding X)
total touches (excluding X-1)
total touches (excluding X-2)
total touches (excluding X-3)
total touches (excluding X-4)
total touches (excluding X-5)
total touches (excluding X-blue)
total touches (excluding X-yellow)
total touches (excluding X-left 2 [1/2])
total touches (excluding X-right 2 [4/5])
total touches (training)
total touches (training-1)
total touches (training-2)
total touches (training-3)
total touches (training-4)
total touches (training-5)
total touches (training excluding X)
total touches (training excluding X-1)
total touches (training excluding X-2)
total touches (training excluding X-3)
total touches (training excluding X-4)
total touches (training excluding X-5)
Dog ID
block color
total touches (all)
total touches (all-1)
total touches (all-2)
total touches (all-3)
total touches (all-4)
total touches (all-5)
total touches (all-blue)
total touches (all-yellow)
total touches (all-left 2 [1/2])
total touches (all-right 2 [4/5])
total touches (excluding X)
total touches (excluding X-1)
total touches (excluding X-2)
total touches (excluding X-3)
total touches (excluding X-4)
total touches (excluding X-5)
total touches (excluding X-blue)
total touches (excluding X-yellow)
total touches (excluding X-left 2 [1/2])
total touches (excluding X-right 2 [4/5])
total touches (training)
total touches (training-1)
total touches (training-2)
total touches (training-3)
total touches (training-4)
total touches (training-5)
total touches (training excluding X)
total touches (training excluding X-1)
total touches (training excluding X-2)
total touches (training excluding X-3)
total touches (training excluding X-4)
total touches (training excluding X-5)
Dog ID
block color
total touches (all)
total touches (all-1)
total touches (all-2)
total touches (all-3)
total touches (all-4)
total touches (all-5)
total touches (all-blue)
total touches (all-yellow)
total touches (all-left 2 [1/2])
total touches (all-right 2 [4/5])
total touches (excluding X)
total touches (excluding X-1)
total touches (excluding X-2)
total touches (excluding X-3)
total touches (excluding X-4)
total touches (excluding X-5)
total touches (excluding X-blue)
total touches (excluding X-yellow)
total touches (excluding X-left 2 [1/2])
total touches (excluding X-right 2 [4/5])
total touches (training)
total touches (training-1)
total touches (training-2)
total touches (training-3)
total touches (training-4)
total touches (training-5)
total touches (training excluding X)
total touches (training excluding X-1)
total touches (training excluding X-2)
total touches (training excluding X-3)
total touches (training excluding X-4)
total touches (training excluding X-5)
Dog ID
block color
total touches (all)
total touches (all-1)
total touches (all-2)
total touches (all-3)
total touches (all-4)
total touches (all-5)
total touches (all-blue)
total touches (all-yellow)
total touches (all-left 2 [1/2])
total touches (all-right 2 [4/5])
total touches (excluding X)
total touches (excluding X-1)
total touches (excluding X-2)
total touches (excluding X-3)
total touches (excluding X-4)
total touches (excluding X-5)
total touches (excluding X-blue)
total touches (excluding X-yellow)
total touches (excluding X-left 2 [1/2])
total touches (excluding X-right 2 [4/5])
total touches (training)
total touches (training-1)
total touches (training-2)
total touches (training-3)
total touches (training-4)
total touches (training-5)
total touches (training excluding X)
total touches (training excluding X-1)
total touches (training excluding X-2)
total touches (training excluding X-3)
total touches (training excluding X-4)
total touches (training excluding X-5)
Dog ID
block color
total touches (all)
total touches (all-1)
total touches (all-2)
total touches (all-3)
total touches (all-4)
total touches (all-5)
total touches (all-blue)
total touches (all-yellow)
total touches (all-left 2 [1/2])
total touches (all-right 2 [4/5])
total touches (excluding X)
total touches (excluding X-1)
total touches (excluding X-2)
total touches (excluding X-3)
total touches (excluding X-4)
total touches (excluding X-5)
total touches (excluding X-blue)
total touches (excluding X-yellow)
total touches (excluding X-left 2 [1/2])
total touches (excluding X-right 2 [4/5])
total touches (training)
total touches (training-1)
total touches (training-2)
total touches (training-3)
total touches (training-4)
total touches (training-5)
total touches (training excluding X)
total touches (training excluding X-1)
total touches (training excluding X-2)
total touches (training excluding X-3)
total touches (training excluding X-4)
total touches (training excluding X-5)
Dog ID
block color
total touches (all)
total touches (all-1)
total touches (all-2)
total touches (all-3)
total touches (all-4)
total touches (all-5)
total touches (all-blue)
total touches (all-yellow)
total touches (all-left 2 [1/2])
total touches (all-right 2 [4/5])
total touches (excluding X)
total touches (excluding X-1)
total touches (excluding X-2)
total touches (excluding X-3)
total touches (excluding X-4)
total touches (excluding X-5)
total touches (excluding X-blue)
total touches (excluding X-yellow)
total touches (excluding X-left 2 [1/2])
total touches (excluding X-right 2 [4/5])
total touches (training)
total touches (training-1)
total touches (training-2)
total touches (training-3)
total touches (training-4)
total touches (training-5)
total touches (training excluding X)
total touches (training excluding X-1)
total touches (training excluding X-2)
total touches (training excluding X-3)
total touches (training excluding X-4)
total touches (training excluding X-5)
Dog ID
block color
total touches (all)
total touches (all-1)
total touches (all-2)
total touches (all-3)
total touches (all-4)
total touches (all-5)
total touches (all-blue)
total touches (all-yellow)
total touches (all-left 2 [1/2])
total touches (all-right 2 [4/5])
total touches (excluding X)
total touches (excluding X-1)
total touches (excluding X-2)
total touches (excluding X-3)
total touches (excluding X-4)
total touches (excluding X-5)
total touches (excluding X-blue)
total touches (excluding X-yellow)
total touches (excluding X-left 2 [1/2])
total touches (excluding X-right 2 [4/5])
total touches (training)
total touches (training-1)
total touches (training-2)
total touches (training-3)
total touches (training-4)
total touches (training-5)
total touches (training excluding X)
total touches (training excluding X-1)
total touches (training excluding X-2)
total touches (training excluding X-3)
total touches (training excluding X-4)
total touches (training excluding X-5)
Dog ID
block color
total touches (all)
total touches (all-1)
total touches (all-2)
total touches (all-3)
total touches (all-4)
total touches (all-5)
total touches (all-blue)
total touches (all-yellow)
total touches (all-left 2 [1/2])
total touches (all-right 2 [4/5])
total touches (excluding X)
total touches (excluding X-1)
total touches (excluding X-2)
total touches (excluding X-3)
total touches (excluding X-4)
total touches (excluding X-5)
total touches (excluding X-blue)
total touches (excluding X-yellow)
total touches (excluding X-left 2 [1/2])
total touches (excluding X-right 2 [4/5])
total touches (training)
total touches (training-1)
total touches (training-2)
total touches (training-3)
total touches (training-4)
total touches (training-5)
total touches (training excluding X)
total touches (training excluding X-1)
total touches (training excluding X-2)
total touches (training excluding X-3)
total touches (training excluding X-4)
total touches (training excluding X-5)
Dog ID
block color
total touches (all)
total touches (all-1)
total touches (all-2)
total touches (all-3)
total touches (all-4)
total touches (all-5)
total touches (all-blue)
total touches (all-yellow)
total touches (all-left 2 [1/2])
total touches (all-right 2 [4/5])
total touches (excluding X)
total touches (excluding X-1)
total touches (excluding X-2)
total touches (excluding X-3)
total touches (excluding X-4)
total touches (excluding X-5)
total touches (excluding X-blue)
total touches (excluding X-yellow)
total touches (excluding X-left 2 [1/2])
total touches (excluding X-right 2 [4/5])
total touches (training)
total touches (training-1)
total touches (training-2)
total touches (training-3)
total touches (training-4)
total touches (training-5)
total touches (training excluding X)
total touches (training excluding X-1)
total touches (training excluding X-2)
total touches (training excluding X-3)
total touches (training excluding X-4)
total touches (training excluding X-5)
Dog ID
block color
total touches (all)
total touches (all-1)
total touches (all-2)
total touches (all-3)
total touches (all-4)
total touches (all-5)
total touches (all-blue)
total touches (all-yellow)
total touches (all-left 2 [1/2])
total touches (all-right 2 [4/5])
total touches (excluding X)
total touches (excluding X-1)
total touches (excluding X-2)
total touches (excluding X-3)
total touches (excluding X-4)
total touches (excluding X-5)
total touches (excluding X-blue)
total touches (excluding X-yellow)
total touches (excluding X-left 2 [1/2])
total touches (excluding X-right 2 [4/5])
total touches (training)
total touches (training-1)
total touches (training-2)
total touches (training-3)
total touches (training-4)
total touches (training-5)
total touches (training excluding X)
total touches (training excluding X-1)
total touches (training excluding X-2)
total touches (training excluding X-3)
total touches (training excluding X-4)
total touches (training excluding X-5)
Dog ID
block color
total touches (all)
total touches (all-1)
total touches (all-2)
total touches (all-3)
total touches (all-4)
total touches (all-5)
total touches (all-blue)
total touches (all-yellow)
total touches (all-left 2 [1/2])
total touches (all-right 2 [4/5])
total touches (excluding X)
total touches (excluding X-1)
total touches (excluding X-2)
total touches (excluding X-3)
total touches (excluding X-4)
total touches (excluding X-5)
total touches (excluding X-blue)
total touches (excluding X-yellow)
total touches (excluding X-left 2 [1/2])
total touches (excluding X-right 2 [4/5])
total touches (training)
total touches (training-1)
total touches (training-2)
total touches (training-3)
total touches (training-4)
total touches (training-5)
total touches (training excluding X)
total touches (training excluding X-1)
total touches (training excluding X-2)
total touches (training excluding X-3)
total touches (training excluding X-4)
total touches (training excluding X-5)
Dog ID
block color
total touches (all)
total touches (all-1)
total touches (all-2)
total touches (all-3)
total touches (all-4)
total touches (all-5)
total touches (all-blue)
total touches (all-yellow)
total touches (all-left 2 [1/2])
total touches (all-right 2 [4/5])
total touches (excluding X)
total touches (excluding X-1)
total touches (excluding X-2)
total touches (excluding X-3)
total touches (excluding X-4)
total touches (excluding X-5)
total touches (excluding X-blue)
total touches (excluding X-yellow)
total touches (excluding X-left 2 [1/2])
total touches (excluding X-right 2 [4/5])
total touches (training)
total touches (training-1)
total touches (training-2)
total touches (training-3)
total touches (training-4)
total touches (training-5)
total touches (training excluding X)
total touches (training excluding X-1)
total touches (training excluding X-2)
total touches (training excluding X-3)
total touches (training excluding X-4)
total touches (training excluding X-5)
Dog ID
block color
total touches (all)
total touches (all-1)
total touches (all-2)
total touches (all-3)
total touches (all-4)
total touches (all-5)
total touches (all-blue)
total touches (all-yellow)
total touches (all-left 2 [1/2])
total touches (all-right 2 [4/5])
total touches (excluding X)
total touches (excluding X-1)
total touches (excluding X-2)
total touches (excluding X-3)
total touches (excluding X-4)
total touches (excluding X-5)
total touches (excluding X-blue)
total touches (excluding X-yellow)
total touches (excluding X-left 2 [1/2])
total touches (excluding X-right 2 [4/5])
total touches (training)
total touches (training-1)
total touches (training-2)
total touches (training-3)
total touches (training-4)
total touches (training-5)
total touches (training excluding X)
total touches (training excluding X-1)
total touches (training excluding X-2)
total touches (training excluding X-3)
total touches (training excluding X-4)
total touches (training excluding X-5)
Dog ID
block color
total touches (all)
total touches (all-1)
total touches (all-2)
total touches (all-3)
total touches (all-4)
total touches (all-5)
total touches (all-blue)
total touches (all-yellow)
total touches (all-left 2 [1/2])
total touches (all-right 2 [4/5])
total touches (excluding X)
total touches (excluding X-1)
total touches (excluding X-2)
total touches (excluding X-3)
total touches (excluding X-4)
total touches (excluding X-5)
total touches (excluding X-blue)
total touches (excluding X-yellow)
total touches (excluding X-left 2 [1/2])
total touches (excluding X-right 2 [4/5])
total touches (training)
total touches (training-1)
total touches (training-2)
total touches (training-3)
total touches (training-4)
total touches (training-5)
total touches (training excluding X)
total touches (training excluding X-1)
total touches (training excluding X-2)
total touches (training excluding X-3)
total touches (training excluding X-4)
total touches (training excluding X-5)
Dog ID
block color
total touches (all)
total touches (all-1)
total touches (all-2)
total touches (all-3)
total touches (all-4)
total touches (all-5)
total touches (all-blue)
total touches (all-yellow)
total touches (all-left 2 [1/2])
total touches (all-right 2 [4/5])
total touches (excluding X)
total touches (excluding X-1)
total touches (excluding X-2)
total touches (excluding X-3)
total touches (excluding X-4)
total touches (excluding X-5)
total touches (excluding X-blue)
total touches (excluding X-yellow)
total touches (excluding X-left 2 [1/2])
total touches (excluding X-right 2 [4/5])
total touches (training)
total touches (training-1)
total touches (training-2)
total touches (training-3)
total touches (training-4)
total touches (training-5)
total touches (training excluding X)
total touches (training excluding X-1)
total touches (training excluding X-2)
total touches (training excluding X-3)
total touches (training excluding X-4)
total touches (training excluding X-5)
Dog ID
block color
total touches (all)
total touches (all-1)
total touches (all-2)
total touches (all-3)
total touches (all-4)
total touches (all-5)
total touches (all-blue)
total touches (all-yellow)
total touches (all-left 2 [1/2])
total touches (all-right 2 [4/5])
total touches (excluding X)
total touches (excluding X-1)
total touches (excluding X-2)
total touches (excluding X-3)
total touches (excluding X-4)
total touches (excluding X-5)
total touches (excluding X-blue)
total touches (excluding X-yellow)
total touches (excluding X-left 2 [1/2])
total touches (excluding X-right 2 [4/5])
total touches (training)
total touches (training-1)
total touches (training-2)
total touches (training-3)
total touches (training-4)
total touches (training-5)
total touches (training excluding X)
total touches (training excluding X-1)
total touches (training excluding X-2)
total touches (training excluding X-3)
total touches (training excluding X-4)
total touches (training excluding X-5)
Dog ID
block color
total touches (all)
total touches (all-1)
total touches (all-2)
total touches (all-3)
total touches (all-4)
total touches (all-5)
total touches (all-blue)
total touches (all-yellow)
total touches (all-left 2 [1/2])
total touches (all-right 2 [4/5])
total touches (excluding X)
total touches (excluding X-1)
total touches (excluding X-2)
total touches (excluding X-3)
total touches (excluding X-4)
total touches (excluding X-5)
total touches (excluding X-blue)
total touches (excluding X-yellow)
total touches (excluding X-left 2 [1/2])
total touches (excluding X-right 2 [4/5])
total touches (training)
total touches (training-1)
total touches (training-2)
total touches (training-3)
total touches (training-4)
total touches (training-5)
total touches (training excluding X)
total touches (training excluding X-1)
total touches (training excluding X-2)
total touches (training excluding X-3)
total touches (training excluding X-4)
total touches (training excluding X-5)
Dog ID
block color
total touches (all)
total touches (all-1)
total touches (all-2)
total touches (all-3)
total touches (all-4)
total touches (all-5)
total touches (all-blue)
total touches (all-yellow)
total touches (all-left 2 [1/2])
total touches (all-right 2 [4/5])
total touches (excluding X)
total touches (excluding X-1)
total touches (excluding X-2)
total touches (excluding X-3)
total touches (excluding X-4)
total touches (excluding X-5)
total touches (excluding X-blue)
total touches (excluding X-yellow)
total touches (excluding X-left 2 [1/2])
total touches (excluding X-right 2 [4/5])
total touches (training)
total touches (training-1)
total touches (training-2)
total touches (training-3)
total touches (training-4)
total touches (training-5)
total touches (training excluding X)
total touches (training excluding X-1)
total touches (training excluding X-2)
total touches (training excluding X-3)
total touches (training excluding X-4)
total touches (training excluding X-5)
Dog ID
block color
total touches (all)
total touches (all-1)
total touches (all-2)
total touches (all-3)
total touches (all-4)
total touches (all-5)
total touches (all-blue)
total touches (all-yellow)
total touches (all-left 2 [1/2])
total touches (all-right 2 [4/5])
total touches (excluding X)
total touches (excluding X-1)
total touches (excluding X-2)
total touches (excluding X-3)
total touches (excluding X-4)
total touches (excluding X-5)
total touches (excluding X-blue)
total touches (excluding X-yellow)
total touches (excluding X-left 2 [1/2])
total touches (excluding X-right 2 [4/5])
total touches (training)
total touches (training-1)
total touches (training-2)
total touches (training-3)
total touches (training-4)
total touches (training-5)
total touches (training excluding X)
total touches (training excluding X-1)
total touches (training excluding X-2)
total touches (training excluding X-3)
total touches (training excluding X-4)
total touches (training excluding X-5)
Dog ID
block color
total touches (all)
total touches (all-1)
total touches (all-2)
total touches (all-3)
total touches (all-4)
total touches (all-5)
total touches (all-blue)
total touches (all-yellow)
total touches (all-left 2 [1/2])
total touches (all-right 2 [4/5])
total touches (excluding X)
total touches (excluding X-1)
total touches (excluding X-2)
total touches (excluding X-3)
total touches (excluding X-4)
total touches (excluding X-5)
total touches (excluding X-blue)
total touches (excluding X-yellow)
total touches (excluding X-left 2 [1/2])
total touches (excluding X-right 2 [4/5])
total touches (training)
total touches (training-1)
total touches (training-2)
total touches (training-3)
total touches (training-4)
total touches (training-5)
total touches (training excluding X)
total touches (training excluding X-1)
total touches (training excluding X-2)
total touches (training excluding X-3)
total touches (training excluding X-4)
total touches (training excluding X-5)
Dog ID
block color
total touches (all)
total touches (all-1)
total touches (all-2)
total touches (all-3)
total touches (all-4)
total touches (all-5)
total touches (all-blue)
total touches (all-yellow)
total touches (all-left 2 [1/2])
total touches (all-right 2 [4/5])
total touches (excluding X)
total touches (excluding X-1)
total touches (excluding X-2)
total touches (excluding X-3)
total touches (excluding X-4)
total touches (excluding X-5)
total touches (excluding X-blue)
total touches (excluding X-yellow)
total touches (excluding X-left 2 [1/2])
total touches (excluding X-right 2 [4/5])
total touches (training)
total touches (training-1)
total touches (training-2)
total touches (training-3)
total touches (training-4)
total touches (training-5)
total touches (training excluding X)
total touches (training excluding X-1)
total touches (training excluding X-2)
total touches (training excluding X-3)
total touches (training excluding X-4)
total touches (training excluding X-5)
Dog ID
block color
total touches (all)
total touches (all-1)
total touches (all-2)
total touches (all-3)
total touches (all-4)
total touches (all-5)
total touches (all-blue)
total touches (all-yellow)
total touches (all-left 2 [1/2])
total touches (all-right 2 [4/5])
total touches (excluding X)
total touches (excluding X-1)
total touches (excluding X-2)
total touches (excluding X-3)
total touches (excluding X-4)
total touches (excluding X-5)
total touches (excluding X-blue)
total touches (excluding X-yellow)
total touches (excluding X-left 2 [1/2])
total touches (excluding X-right 2 [4/5])
total touches (training)
total touches (training-1)
total touches (training-2)
total touches (training-3)
total touches (training-4)
total touches (training-5)
total touches (training excluding X)
total touches (training excluding X-1)
total touches (training excluding X-2)
total touches (training excluding X-3)
total touches (training excluding X-4)
total touches (training excluding X-5)
Dog ID
block color
total touches (all)
total touches (all-1)
total touches (all-2)
total touches (all-3)
total touches (all-4)
total touches (all-5)
total touches (all-blue)
total touches (all-yellow)
total touches (all-left 2 [1/2])
total touches (all-right 2 [4/5])
total touches (excluding X)
total touches (excluding X-1)
total touches (excluding X-2)
total touches (excluding X-3)
total touches (excluding X-4)
total touches (excluding X-5)
total touches (excluding X-blue)
total touches (excluding X-yellow)
total touches (excluding X-left 2 [1/2])
total touches (excluding X-right 2 [4/5])
total touches (training)
total touches (training-1)
total touches (training-2)
total touches (training-3)
total touches (training-4)
total touches (training-5)
total touches (training excluding X)
total touches (training excluding X-1)
total touches (training excluding X-2)
total touches (training excluding X-3)
total touches (training excluding X-4)
total touches (training excluding X-5)
Dog ID
block color
total touches (all)
total touches (all-1)
total touches (all-2)
total touches (all-3)
total touches (all-4)
total touches (all-5)
total touches (all-blue)
total touches (all-yellow)
total touches (all-left 2 [1/2])
total touches (all-right 2 [4/5])
total touches (excluding X)
total touches (excluding X-1)
total touches (excluding X-2)
total touches (excluding X-3)
total touches (excluding X-4)
total touches (excluding X-5)
total touches (excluding X-blue)
total touches (excluding X-yellow)
total touches (excluding X-left 2 [1/2])
total touches (excluding X-right 2 [4/5])
total touches (training)
total touches (training-1)
total touches (training-2)
total touches (training-3)
total touches (training-4)
total touches (training-5)
total touches (training excluding X)
total touches (training excluding X-1)
total touches (training excluding X-2)
total touches (training excluding X-3)
total touches (training excluding X-4)
total touches (training excluding X-5)
Dog ID
block color
total touches (all)
total touches (all-1)
total touches (all-2)
total touches (all-3)
total touches (all-4)
total touches (all-5)
total touches (all-blue)
total touches (all-yellow)
total touches (all-left 2 [1/2])
total touches (all-right 2 [4/5])
total touches (excluding X)
total touches (excluding X-1)
total touches (excluding X-2)
total touches (excluding X-3)
total touches (excluding X-4)
total touches (excluding X-5)
total touches (excluding X-blue)
total touches (excluding X-yellow)
total touches (excluding X-left 2 [1/2])
total touches (excluding X-right 2 [4/5])
total touches (training)
total touches (training-1)
total touches (training-2)
total touches (training-3)
total touches (training-4)
total touches (training-5)
total touches (training excluding X)
total touches (training excluding X-1)
total touches (training excluding X-2)
total touches (training excluding X-3)
total touches (training excluding X-4)
total touches (training excluding X-5)
Dog ID
block color
total touches (all)
total touches (all-1)
total touches (all-2)
total touches (all-3)
total touches (all-4)
total touches (all-5)
total touches (all-blue)
total touches (all-yellow)
total touches (all-left 2 [1/2])
total touches (all-right 2 [4/5])
total touches (excluding X)
total touches (excluding X-1)
total touches (excluding X-2)
total touches (excluding X-3)
total touches (excluding X-4)
total touches (excluding X-5)
total touches (excluding X-blue)
total touches (excluding X-yellow)
total touches (excluding X-left 2 [1/2])
total touches (excluding X-right 2 [4/5])
total touches (training)
total touches (training-1)
total touches (training-2)
total touches (training-3)
total touches (training-4)
total touches (training-5)
total touches (training excluding X)
total touches (training excluding X-1)
total touches (training excluding X-2)
total touches (training excluding X-3)
total touches (training excluding X-4)
total touches (training excluding X-5)
Dog ID
block color
total touches (all)
total touches (all-1)
total touches (all-2)
total touches (all-3)
total touches (all-4)
total touches (all-5)
total touches (all-blue)
total touches (all-yellow)
total touches (all-left 2 [1/2])
total touches (all-right 2 [4/5])
total touches (excluding X)
total touches (excluding X-1)
total touches (excluding X-2)
total touches (excluding X-3)
total touches (excluding X-4)
total touches (excluding X-5)
total touches (excluding X-blue)
total touches (excluding X-yellow)
total touches (excluding X-left 2 [1/2])
total touches (excluding X-right 2 [4/5])
total touches (training)
total touches (training-1)
total touches (training-2)
total touches (training-3)
total touches (training-4)
total touches (training-5)
total touches (training excluding X)
total touches (training excluding X-1)
total touches (training excluding X-2)
total touches (training excluding X-3)
total touches (training excluding X-4)
total touches (training excluding X-5)
Dog ID
block color
total touches (all)
total touches (all-1)
total touches (all-2)
total touches (all-3)
total touches (all-4)
total touches (all-5)
total touches (all-blue)
total touches (all-yellow)
total touches (all-left 2 [1/2])
total touches (all-right 2 [4/5])
total touches (excluding X)
total touches (excluding X-1)
total touches (excluding X-2)
total touches (excluding X-3)
total touches (excluding X-4)
total touches (excluding X-5)
total touches (excluding X-blue)
total touches (excluding X-yellow)
total touches (excluding X-left 2 [1/2])
total touches (excluding X-right 2 [4/5])
total touches (training)
total touches (training-1)
total touches (training-2)
total touches (training-3)
total touches (training-4)
total touches (training-5)
total touches (training excluding X)
total touches (training excluding X-1)
total touches (training excluding X-2)
total touches (training excluding X-3)
total touches (training excluding X-4)
total touches (training excluding X-5)
Dog ID
block color
total touches (all)
total touches (all-1)
total touches (all-2)
total touches (all-3)
total touches (all-4)
total touches (all-5)
total touches (all-blue)
total touches (all-yellow)
total touches (all-left 2 [1/2])
total touches (all-right 2 [4/5])
total touches (excluding X)
total touches (excluding X-1)
total touches (excluding X-2)
total touches (excluding X-3)
total touches (excluding X-4)
total touches (excluding X-5)
total touches (excluding X-blue)
total touches (excluding X-yellow)
total touches (excluding X-left 2 [1/2])
total touches (excluding X-right 2 [4/5])
total touches (training)
total touches (training-1)
total touches (training-2)
total touches (training-3)
total touches (training-4)
total touches (training-5)
total touches (training excluding X)
total touches (training excluding X-1)
total touches (training excluding X-2)
total touches (training excluding X-3)
total touches (training excluding X-4)
total touches (training excluding X-5)
Dog ID
block color
total touches (all)
total touches (all-1)
total touches (all-2)
total touches (all-3)
total touches (all-4)
total touches (all-5)
total touches (all-blue)
total touches (all-yellow)
total touches (all-left 2 [1/2])
total touches (all-right 2 [4/5])
total touches (excluding X)
total touches (excluding X-1)
total touches (excluding X-2)
total touches (excluding X-3)
total touches (excluding X-4)
total touches (excluding X-5)
total touches (excluding X-blue)
total touches (excluding X-yellow)
total touches (excluding X-left 2 [1/2])
total touches (excluding X-right 2 [4/5])
total touches (training)
total touches (training-1)
total touches (training-2)
total touches (training-3)
total touches (training-4)
total touches (training-5)
total touches (training excluding X)
total touches (training excluding X-1)
total touches (training excluding X-2)
total touches (training excluding X-3)
total touches (training excluding X-4)
total touches (training excluding X-5)
Dog ID
block color
total touches (all)
total touches (all-1)
total touches (all-2)
total touches (all-3)
total touches (all-4)
total touches (all-5)
total touches (all-blue)
total touches (all-yellow)
total touches (all-left 2 [1/2])
total touches (all-right 2 [4/5])
total touches (excluding X)
total touches (excluding X-1)
total touches (excluding X-2)
total touches (excluding X-3)
total touches (excluding X-4)
total touches (excluding X-5)
total touches (excluding X-blue)
total touches (excluding X-yellow)
total touches (excluding X-left 2 [1/2])
total touches (excluding X-right 2 [4/5])
total touches (training)
total touches (training-1)
total touches (training-2)
total touches (training-3)
total touches (training-4)
total touches (training-5)
total touches (training excluding X)
total touches (training excluding X-1)
total touches (training excluding X-2)
total touches (training excluding X-3)
total touches (training excluding X-4)
total touches (training excluding X-5)
Dog ID
block color
total touches (all)
total touches (all-1)
total touches (all-2)
total touches (all-3)
total touches (all-4)
total touches (all-5)
total touches (all-blue)
total touches (all-yellow)
total touches (all-left 2 [1/2])
total touches (all-right 2 [4/5])
total touches (excluding X)
total touches (excluding X-1)
total touches (excluding X-2)
total touches (excluding X-3)
total touches (excluding X-4)
total touches (excluding X-5)
total touches (excluding X-blue)
total touches (excluding X-yellow)
total touches (excluding X-left 2 [1/2])
total touches (excluding X-right 2 [4/5])
total touches (training)
total touches (training-1)
total touches (training-2)
total touches (training-3)
total touches (training-4)
total touches (training-5)
total touches (training excluding X)
total touches (training excluding X-1)
total touches (training excluding X-2)
total touches (training excluding X-3)
total touches (training excluding X-4)
total touches (training excluding X-5)
Dog ID
block color
total touches (all)
total touches (all-1)
total touches (all-2)
total touches (all-3)
total touches (all-4)
total touches (all-5)
total touches (all-blue)
total touches (all-yellow)
total touches (all-left 2 [1/2])
total touches (all-right 2 [4/5])
total touches (excluding X)
total touches (excluding X-1)
total touches (excluding X-2)
total touches (excluding X-3)
total touches (excluding X-4)
total touches (excluding X-5)
total touches (excluding X-blue)
total touches (excluding X-yellow)
total touches (excluding X-left 2 [1/2])
total touches (excluding X-right 2 [4/5])
total touches (training)
total touches (training-1)
total touches (training-2)
total touches (training-3)
total touches (training-4)
total touches (training-5)
total touches (training excluding X)
total touches (training excluding X-1)
total touches (training excluding X-2)
total touches (training excluding X-3)
total touches (training excluding X-4)
total touches (training excluding X-5)
Dog ID
block color
total touches (all)
total touches (all-1)
total touches (all-2)
total touches (all-3)
total touches (all-4)
total touches (all-5)
total touches (all-blue)
total touches (all-yellow)
total touches (all-left 2 [1/2])
total touches (all-right 2 [4/5])
total touches (excluding X)
total touches (excluding X-1)
total touches (excluding X-2)
total touches (excluding X-3)
total touches (excluding X-4)
total touches (excluding X-5)
total touches (excluding X-blue)
total touches (excluding X-yellow)
total touches (excluding X-left 2 [1/2])
total touches (excluding X-right 2 [4/5])
total touches (training)
total touches (training-1)
total touches (training-2)
total touches (training-3)
total touches (training-4)
total touches (training-5)
total touches (training excluding X)
total touches (training excluding X-1)
total touches (training excluding X-2)
total touches (training excluding X-3)
total touches (training excluding X-4)
total touches (training excluding X-5)
Dog ID
block color
total touches (all)
total touches (all-1)
total touches (all-2)
total touches (all-3)
total touches (all-4)
total touches (all-5)
total touches (all-blue)
total touches (all-yellow)
total touches (all-left 2 [1/2])
total touches (all-right 2 [4/5])
total touches (excluding X)
total touches (excluding X-1)
total touches (excluding X-2)
total touches (excluding X-3)
total touches (excluding X-4)
total touches (excluding X-5)
total touches (excluding X-blue)
total touches (excluding X-yellow)
total touches (excluding X-left 2 [1/2])
total touches (excluding X-right 2 [4/5])
total touches (training)
total touches (training-1)
total touches (training-2)
total touches (training-3)
total touches (training-4)
total touches (training-5)
total touches (training excluding X)
total touches (training excluding X-1)
total touches (training excluding X-2)
total touches (training excluding X-3)
total touches (training excluding X-4)
total touches (training excluding X-5)
Dog ID
block color
total touches (all)
total touches (all-1)
total touches (all-2)
total touches (all-3)
total touches (all-4)
total touches (all-5)
total touches (all-blue)
total touches (all-yellow)
total touches (all-left 2 [1/2])
total touches (all-right 2 [4/5])
total touches (excluding X)
total touches (excluding X-1)
total touches (excluding X-2)
total touches (excluding X-3)
total touches (excluding X-4)
total touches (excluding X-5)
total touches (excluding X-blue)
total touches (excluding X-yellow)
total touches (excluding X-left 2 [1/2])
total touches (excluding X-right 2 [4/5])
total touches (training)
total touches (training-1)
total touches (training-2)
total touches (training-3)
total touches (training-4)
total touches (training-5)
total touches (training excluding X)
total touches (training excluding X-1)
total touches (training excluding X-2)
total touches (training excluding X-3)
total touches (training excluding X-4)
total touches (training excluding X-5)
Dog ID
block color
total touches (all)
total touches (all-1)
total touches (all-2)
total touches (all-3)
total touches (all-4)
total touches (all-5)
total touches (all-blue)
total touches (all-yellow)
total touches (all-left 2 [1/2])
total touches (all-right 2 [4/5])
total touches (excluding X)
total touches (excluding X-1)
total touches (excluding X-2)
total touches (excluding X-3)
total touches (excluding X-4)
total touches (excluding X-5)
total touches (excluding X-blue)
total touches (excluding X-yellow)
total touches (excluding X-left 2 [1/2])
total touches (excluding X-right 2 [4/5])
total touches (training)
total touches (training-1)
total touches (training-2)
total touches (training-3)
total touches (training-4)
total touches (training-5)
total touches (training excluding X)
total touches (training excluding X-1)
total touches (training excluding X-2)
total touches (training excluding X-3)
total touches (training excluding X-4)
total touches (training excluding X-5)
Dog ID
block color
total touches (all)
total touches (all-1)
total touches (all-2)
total touches (all-3)
total touches (all-4)
total touches (all-5)
total touches (all-blue)
total touches (all-yellow)
total touches (all-left 2 [1/2])
total touches (all-right 2 [4/5])
total touches (excluding X)
total touches (excluding X-1)
total touches (excluding X-2)
total touches (excluding X-3)
total touches (excluding X-4)
total touches (excluding X-5)
total touches (excluding X-blue)
total touches (excluding X-yellow)
total touches (excluding X-left 2 [1/2])
total touches (excluding X-right 2 [4/5])
total touches (training)
total touches (training-1)
total touches (training-2)
total touches (training-3)
total touches (training-4)
total touches (training-5)
total touches (training excluding X)
total touches (training excluding X-1)
total touches (training excluding X-2)
total touches (training excluding X-3)
total touches (training excluding X-4)
total touches (training excluding X-5)
Dog ID
block color
total touches (all)
total touches (all-1)
total touches (all-2)
total touches (all-3)
total touches (all-4)
total touches (all-5)
total touches (all-blue)
total touches (all-yellow)
total touches (all-left 2 [1/2])
total touches (all-right 2 [4/5])
total touches (excluding X)
total touches (excluding X-1)
total touches (excluding X-2)
total touches (excluding X-3)
total touches (excluding X-4)
total touches (excluding X-5)
total touches (excluding X-blue)
total touches (excluding X-yellow)
total touches (excluding X-left 2 [1/2])
total touches (excluding X-right 2 [4/5])
total touches (training)
total touches (training-1)
total touches (training-2)
total touches (training-3)
total touches (training-4)
total touches (training-5)
total touches (training excluding X)
total touches (training excluding X-1)
total touches (training excluding X-2)
total touches (training excluding X-3)
[truncated: 308 more rows]

## Sheet: E3_verbal_touches
Dog ID	A#554517	A#551780	A#552696	A#554856	A#555011	A#555698	A#555475	A#550992	A#552658	A#552244	A#553753	A#549468	A#553167	A#552237	A#554106	A#553333	A#554123	A#552840	A#555472	A#553332	A#566342	A#566335	A#568217	A#564176	A#568639	A#568596	A#568957	A#569979	A#569187		averages
block majority color	blue	yellow	blue	yellow	yellow	blue	blue	yellow	yellow	blue	blue	yellow	blue	yellow	blue	blue	yellow	blue	yellow	yellow	blue	yellow	blue	yellow	blue	yellow	yellow	yellow	blue
total touches (all)	58	118	123	59	106	116	81	105	109	37	83	107	97	95	109	47	119	172	25	69	90	111	137	82	40	78	127	139	142		95.8966
total touches (all-1)	3	19	27	2	17	21	5	17	17	3	4	24	3	10	16	5	31	9	2	14	10	22	13	11	5	3	22	16	14		12.5862
total touches (all-2)	9	15	41	4	22	28	21	21	19	5	24	23	24	17	22	15	13	51	1	6	38	15	27	5	12	16	32	31	46		20.7931
total touches (all-3)	14	58	28	17	48	37	30	37	34	15	12	42	32	32	23	7	36	37	11	28	18	28	32	27	8	35	47	54	31		29.5862
total touches (all-4)	24	14	24	19	13	25	22	17	21	11	37	13	35	20	29	16	23	54	6	14	19	21	46	23	9	15	20	19	42		22.4483
total touches (all-5)	8	12	3	17	6	5	3	13	18	3	6	5	3	16	19	4	16	21	5	7	5	25	19	16	6	9	6	19	9		10.4828
total touches (all-blue)	25	29	58	23	35	63	38	38	40	21	22	36	38	58	58	16	36	67	7	20	33	36	64	28	19	31	52	50	54		37.7586
total touches (all-yellow)	33	89	65	36	71	53	43	67	69	16	61	71	59	37	51	31	83	105	18	49	57	75	73	54	21	47	75	89	88		58.1379
total touches (all-left 2 [1/2])	12	34	68	6	39	49	26	38	36	8	28	47	27	27	38	20	44	60	3	20	48	37	40	16	17	19	54	47	60		33.3793
total touches (all-right 2 [4/5])	32	16	27	36	19	30	25	30	39	14	43	18	38	36	48	20	39	75	11	21	24	46	65	39	15	24	26	38	51		32.5862
total touches (excluding X)	44	65	80	49	99	107	70	102	97	26	69	91	82	73	88	42	115	155	14	62	69	102	136	74	33	77	121	132	132		82.9655
total touches (excluding X-1)	2	8	14	2	14	21	5	17	14	2	4	22	3	8	14	5	29	9	2	12	8	20	13	9	3	3	22	15	13		10.7931
total touches (excluding X-2)	6	7	28	4	21	26	20	21	18	4	20	19	17	13	18	12	13	39	1	6	34	14	27	5	9	16	31	31	41		17.9655
total touches (excluding X-3)	11	33	18	15	46	34	23	35	28	9	10	35	31	26	18	7	35	37	7	25	11	25	31	24	8	35	43	49	29		25.4483
total touches (excluding X-4)	18	11	17	16	12	21	19	16	20	9	30	11	28	17	23	14	23	49	3	13	14	20	46	21	8	14	20	19	40		19.7241
total touches (excluding X-5)	7	6	3	12	6	5	3	13	17	2	5	4	3	9	15	4	15	21	1	6	2	23	19	15	5	9	5	18	9		9.03448
total touches (excluding X-blue)	20	18	35	20	33	60	31	37	38	13	19	30	37	30	47	16	36	67	4	19	21	34	63	26	16	30	51	50	51		32.8276
total touches (excluding X-yellow)	24	47	45	29	66	47	39	65	59	13	50	61	45	43	41	26	79	88	10	43	48	68	73	48	17	47	70	82	81		50.1379
total touches (excluding X-left 2 [1/2])	8	15	42	6	35	47	25	38	32	6	24	41	20	21	32	17	42	48	3	18	42	34	40	14	12	19	53	46	54		28.7586
total touches (excluding X-right 2 [4/5])	25	17	20	28	18	26	22	29	37	11	35	15	31	26	38	18	38	70	4	19	16	43	65	36	13	23	25	37	49		28.7586
total touches (training)	23	27	24	14	19	24	23	31	28	24	21	24	14	23	17	32	21	27	17	20	35	39	20	36	16	16	25	19	32		23.8276
total touches (training-1)	1	6	4	2	5	1	2	5	5	3	1	6	1	2	1	4	2	2	1	2	5	9	2	5	1	2	3	4	1		3.03448
total touches (training-2)	3	2	4	1	3	7	8	2	3	3	7	1	3	5	7	7	1	4	1	2	14	4	2	3	4	1	3	3	7		3.96552
total touches (training-3)	4	12	5	3	8	9	8	10	6	6	4	8	4	10	3	6	11	6	5	5	5	10	4	15	3	5	13	7	6		6.93103
total touches (training-4)	11	5	9	3	1	6	4	8	9	10	6	5	4	3	4	11	5	6	5	5	9	9	9	11	4	3	4	3	15		6.44828
total touches (training-5)	4	2	2	5	2	1	1	6	5	2	3	4	2	3	2	4	2	9	5	6	2	7	3	2	4	5	2	2	3		3.44828
total touches (training excluding X)	20	15	22	12	17	22	20	31	25	17	20	22	12	17	16	30	21	26	7	18	27	39	20	32	16	15	21	19	32		21.069
total touches (training excluding X-1)	1	3	4	2	5	1	2	5	4	2	1	5	1	1	1	4	2	2	1	1	4	9	2	3	1	2	3	4	1		2.65517
total touches (training excluding X-2)	2	2	4	1	3	7	8	2	3	2	6	1	2	3	7	7	1	4	1	2	11	4	2	3	4	1	2	3	7		3.62069
total touches (training excluding X-3)	4	5	4	3	6	8	6	10	5	4	4	8	3	8	2	6	11	6	2	5	4	10	4	15	3	5	11	7	6		6.03448
total touches (training excluding X-4)	9	4	8	3	1	5	3	8	9	8	6	5	4	3	4	9	5	5	2	5	7	9	9	9	4	2	4	3	15		5.7931
total touches (training excluding X-5)	4	1	2	3	2	1	1	6	4	1	3	3	2	2	2	4	2	9	1	5	1	7	3	2	4	5	1	2	3		2.96552
total touches (level 1)	6	17	7	5	4	5	5	4	4	4	9	8	5	7	5	5	4	7	5	6	6	9	4	7	10	4	6	5	6		6.17241
total touches (level 1-1)	0	7	3	0	0	0	0	0	1	0	0	0	0	0	1	0	0	1	0	0	0	1	0	0	4	0	0	0	0		0.62069
total touches (level 1-2)	0	5	2	0	1	1	1	0	1	2	2	0	2	0	1	2	0	5	0	1	3	2	0	0	4	0	1	1	2		1.34483
total touches (level 1-3)	3	5	1	0	1	1	2	3	2	0	1	8	1	1	1	1	2	1	5	5	2	4	0	4	0	1	5	4	1		2.24138
total touches (level 1-4)	3	0	1	1	1	3	2	0	0	1	6	0	2	3	2	2	0	0	0	0	1	2	4	0	0	3	0	0	3		1.37931
total touches (level 1-5)	0	0	0	4	1	0	0	1	0	1	0	0	0	3	0	0	2	0	0	0	0	0	0	3	2	0	0	0	0		0.586207
total touches (level 1 excluding X)	4	4	4	4	4	4	4	4	4	4	4	4	4	4	4	4	4	4	4	4	4	4	4	4	4	4	4	4	4		4
total touches (level 1 excluding X-1)	0	1	1	0	0	0	0	0	1	0	0	0	0	0	1	0	0	1	0	0	0	1	0	0	2	0	0	0	0		0.275862
total touches (level 1 excluding X-2)	0	1	1	0	1	1	1	0	1	2	1	0	2	0	0	1	0	2	0	1	2	1	0	0	1	0	1	1	2		0.793103
total touches (level 1 excluding X-3)	2	2	1	0	1	1	1	3	2	0	0	4	1	1	1	1	2	1	4	3	1	1	0	2	0	1	3	3	0		1.44828
total touches (level 1 excluding X-4)	2	0	1	1	1	2	2	0	0	1	3	0	1	2	2	2	0	0	0	0	1	1	4	0	0	3	0	0	2		1.06897
total touches (level 1 excluding X-5)	0	0	0	3	1	0	0	1	0	1	0	0	0	1	0	0	2	0	0	0	0	0	0	2	1	0	0	0	0		0.413793
total touches (level 2)	8	9	9	5	5	5	6	6	9	8	9	7	6	7	9	6	5	7	3	7	8	10	4	11	5	6	6	4	4		6.68966
total touches (level 2-1)	0	0	0	0	1	0	0	0	2	0	0	0	0	1	3	1	0	0	1	0	1	1	0	0	0	0	2	0	0		0.448276
total touches (level 2-2)	2	0	3	1	2	2	4	0	1	0	0	0	5	2	0	4	1	6	0	0	4	0	0	0	1	0	2	2	2		1.51724
total touches (level 2-3)	4	9	5	1	2	2	2	4	4	8	0	7	1	4	2	0	2	1	1	3	1	1	4	0	2	2	1	2	0		2.58621
total touches (level 2-4)	1	0	1	3	0	1	0	2	1	0	8	0	0	0	4	1	2	0	1	3	2	3	0	4	2	2	1	0	2		1.51724
total touches (level 2-5)	1	0	0	0	0	0	0	0	1	0	1	0	0	0	0	0	0	0	0	1	0	5	0	7	0	2	0	0	0		0.62069
total touches (level 2 excluding X)	5	4	4	4	5	4	4	4	7	4	4	4	3	5	7	5	4	4	3	5	5	9	4	11	4	6	6	4	4		4.89655
total touches (level 2 excluding X-1)	0	0	0	0	1	0	0	0	2	0	0	0	0	1	3	1	0	0	1	0	1	1	0	0	0	0	2	0	0		0.448276
total touches (level 2 excluding X-2)	1	0	2	1	2	1	3	0	1	0	0	0	2	2	0	3	1	3	0	0	4	0	0	0	1	0	2	2	2		1.13793
total touches (level 2 excluding X-3)	2	4	2	1	2	2	1	2	2	4	0	4	1	2	2	0	1	1	1	2	0	1	4	0	2	2	1	2	0		1.65517
total touches (level 2 excluding X-4)	1	0	0	2	0	1	0	2	1	0	4	0	0	0	2	1	2	0	1	2	0	3	0	4	1	2	1	0	2		1.10345
total touches (level 2 excluding X-5)	1	0	0	0	0	0	0	0	1	0	0	0	0	0	0	0	0	0	0	1	0	4	0	7	0	2	0	0	0		0.551724
total touches (level 3)	14	20	10	9	15	13	17	14	15	1	17	23	10	9	10	4	5	5		20	11	12	10	6	9	11	8	21	10		11.75
total touches (level 3-1)	0	2	0	0	3	0	1	2	3	0	1	2	1	3	0	0	0	0		4	0	5	0	0	0	0	0	4	0		1.10714
total touches (level 3-2)	3	0	7	0	5	2	3	2	3	0	5	5	6	4	2	2	0	5		0	3	0	4	0	3	1	4	8	2		2.82143
total touches (level 3-3)	3	7	1	2	3	6	7	5	6	1	4	10	2	1	1	0	0	0		12	1	4	3	2	3	6	3	5	4		3.64286
total touches (level 3-4)	5	4	1	5	3	4	4	2	2	0	6	6	1	1	3	2	1	0		4	4	2	3	2	3	3	1	2	4		2.78571
total touches (level 3-5)	3	7	1	2	1	1	2	3	1	0	1	0	0	0	4	0	4	0		0	3	1	0	2	0	1	0	2	0		1.39286
total touches (level 3 excluding X)	10	10	7	6	12	12	14	14	13	1	15	21	7	6	7	3	4	4		20	8	11	10	6	9	11	8	21	10		10
total touches (level 3 excluding X-1)	0	2	0	0	1	0	1	2	2	0	1	2	1	2	0	0	0	0		4	0	4	0	0	0	0	0	4	0		0.928571
total touches (level 3 excluding X-2)	3	0	4	0	4	2	3	2	2	0	3	5	3	2	2	1	0	4		0	3	0	4	0	3	1	4	8	2		2.32143
total touches (level 3 excluding X-3)	3	4	1	2	3	6	4	5	6	1	4	10	2	1	1	0	0	0		12	1	4	3	2	3	6	3	5	4		3.42857
total touches (level 3 excluding X-4)	2	2	1	3	3	3	4	2	2	0	6	4	1	1	2	2	1	0		4	3	2	3	2	3	3	1	2	4		2.35714
total touches (level 3 excluding X-5)	2	2	1	1	1	1	2	3	1	0	1	0	0	0	2	0	3	0		0	1	1	0	2	0	1	0	2	0		0.964286
total touches (level 4)	7	33	24	26	19	11	22	18	10		12	16	12	15	13		16	14		16	9	14	15	13		17	17	14	16		15.96
total touches (level 4-1)	2	2	3	0	1	2	2	3	2		2	3	0	1	2		5	0		8	1	2	3	3		0	3	0	1		2.04
total touches (level 4-2)	1	7	8	2	3	3	5	4	2		6	4	2	4	3		0	7		3	3	5	5	1		4	3	4	5		3.76
total touches (level 4-3)	0	16	5	11	10	3	9	6	2		0	6	5	2	1		4	2		3	4	3	3	2		10	7	3	3		4.8
total touches (level 4-4)	4	5	8	7	4	1	6	4	3		3	2	5	5	4		5	5		2	1	1	3	5		3	4	4	6		4
total touches (level 4-5)	0	3	0	6	1	2	0	1	1		1	1	0	3	3		2	0		0	0	3	1	2		0	0	3	1		1.36
total touches (level 4 excluding X)	5	25	20	23	19	10	20	17	10		12	13	11	11	12		15	13		15	6	14	15	13		17	17	14	13		14.4
total touches (level 4 excluding X-1)	1	1	3	0	1	2	2	3	2		2	2	0	1	2		4	0		7	1	2	3	3		0	3	0	1		1.84
total touches (level 4 excluding X-2)	0	3	8	2	3	2	5	4	2		6	2	2	4	2		0	7		3	3	5	5	1		4	3	4	3		3.32
total touches (level 4 excluding X-3)	0	13	5	9	10	3	9	6	2		0	6	5	2	1		4	2		3	1	3	3	2		10	7	3	3		4.48
total touches (level 4 excluding X-4)	4	5	4	7	4	1	4	3	3		3	2	4	3	4		5	4		2	1	1	3	5		3	4	4	5		3.52
total touches (level 4 excluding X-5)	0	3	0	5	1	2	0	1	1		1	1	0	1	3		2	0		0	0	3	1	2		0	0	3	1		1.24
total touches (level 5)		9	19		5	8	8	7	7		15	5	8	9	8		5	9			14	6	8	5		4	8	8	7		8.27273
total touches (level 5-1)		2	5		0	2	0	3	0		0	3	0	0	1		3	0			2	0	2	2		0	2	0	1		1.27273
total touches (level 5-2)		0	4		1	2	0	2	1		4	1	1	0	1		1	0			7	0	1	1		0	3	0	1		1.40909
total touches (level 5-3)		7	7		4	3	2	1	3		3	1	4	3	5		1	2			3	0	1	2		4	1	8	2		3.04545
total touches (level 5-4)		0	3		0	1	6	1	1		8	0	3	3	1		0	5			2	1	3	0		0	1	0	2		1.86364
total touches (level 5-5)		0	0		0	0	0	0	2		0	0	0	3	0		0	2			0	5	1	0		0	1	0	1		0.681818
total touches (level 5 excluding X)		4	7		5	6	8	7	6		14	5	8	7	6		5	9			13	5	8	5		4	8	4	6		6.81818
total touches (level 5 excluding X-1)		1	1		0	2	0	3	0		0	3	0	0	1		3	0			1	0	2	2		0	2	0	1		1
total touches (level 5 excluding X-2)		0	1		1	2	0	2	1		4	1	1	0	1		1	0			7	0	1	1		0	3	0	0		1.22727
total touches (level 5 excluding X-3)		3	3		4	2	2	1	3		2	1	4	2	3		1	2			3	0	1	2		4	1	4	2		2.27273
total touches (level 5 excluding X-4)		0	2		0	0	6	1	0		8	0	3	3	1		0	5			2	1	3	0		0	1	0	2		1.72727
total touches (level 5 excluding X-5)		0	0		0	0	0	0	2		0	0	0	2	0		0	2			0	4	1	0		0	1	0	1		0.590909
total touches (level 6)		3	13		13	10		5	12			7	12	11	20		4	8			6	8	6	4		11	11	5	4		8.65
total touches (level 6-1)		0	5		3	0		0	2			1	0	2	3		0	0			1	2	0	1		1	2	0	0		1.15
total touches (level 6-2)		1	5		2	2		4	3			6	0	1	5		2	6			4	2	2	0		4	3	2	3		2.85
total touches (level 6-3)		2	2		5	6		1	2			0	6	3	8		0	1			1	2	1	2		6	3	1	0		2.6
total touches (level 6-4)		0	1		3	2		0	1			0	6	3	2		2	1			0	2	2	1		0	1	2	1		1.5
total touches (level 6-5)		0	0		0	0		0	4			0	0	2	2		0	0			0	0	1	0		0	2	0	0		0.55
total touches (level 6 excluding X)		3	5		11	9		5	10			5	10	10	13		4	5			5	7	6	3		11	11	5	4		7.1
total touches (level 6 excluding X-1)		0	1		2	0		0	1			1	0	2	1		0	0			1	1	0	1		1	2	0	0		0.7
total touches (level 6 excluding X-2)		1	3		2	2		4	3			4	0	1	3		2	3			4	2	2	0		4	3	2	3		2.4
total touches (level 6 excluding X-3)		2	0		5	5		1	1			0	6	3	6		0	1			0	2	1	1		6	3	1	0		2.2
total touches (level 6 excluding X-4)		0	1		2	2		0	1			0	4	3	1		2	1			0	2	2	1		0	1	2	1		1.3
total touches (level 6 excluding X-5)		0	0		0	0		0	4			0	0	1	2		0	0			0	0	1	0		0	2	0	0		0.5
total touches (level 7)			17		23	16		20	24			17	9	11	22		13	10			1	13	13			9	17	25	34		16.3333
total touches (level 7-1)			7		4	4		4	2			9	0	1	4		5	0			0	2	1			0	3	5	5		3.11111
total touches (level 7-2)			8		5	3		7	5			6	1	1	2		1	3			0	2	2			6	4	4	14		4.11111
total touches (level 7-3)			2		12	4		7	9			2	4	5	2		4	4			1	4	1			1	6	10	8		4.77778
total touches (level 7-4)			0		1	5		0	4			0	3	2	8		2	3			0	1	5			1	4	2	5		2.55556
total touches (level 7-5)			0		1	0		2	4			0	1	2	6		1	0			0	4	4			1	0	4	2		1.77778
total touches (level 7 excluding X)			11		23	16		20	22			17	9	10	18		12	10			1	13	13			9	17	24	30		15.2778
total touches (level 7 excluding X-1)			4		4	4		4	2			9	0	1	4		4	0			0	2	1			0	3	4	4		2.77778
total touches (level 7 excluding X-2)			5		5	3		7	5			6	1	1	2		1	3			0	2	2			6	4	4	12		3.83333
total touches (level 7 excluding X-3)			2		12	4		7	7			2	4	4	2		4	4			1	4	1			1	6	10	7		4.55556
total touches (level 7 excluding X-4)			0		1	5		0	4			0	3	2	6		2	3			0	1	5			1	4	2	5		2.44444
total touches (level 7 excluding X-5)			0		1	0		2	4			0	1	2	4		1	0			0	4	4			1	0	4	2		1.66667
total touches (level 8)					3	24							9	3	5		22	26					25				29	8	29		16.6364
total touches (level 8-1)					0	12							0	0	1		12	2					1				7	2	6		3.90909
total touches (level 8-2)					0	6							1	0	1		4	6					2				9	2	10		3.72727
total touches (level 8-3)					3	3							1	3	0		3	6					5				8	4	7		3.90909
total touches (level 8-4)					0	2							7	0	1		2	8					10				4	0	4		3.45455
total touches (level 8-5)					0	1							0	0	2		1	4					7				1	0	2		1.63636
total touches (level 8 excluding X)					3	24							6	3	5		22	24					24				29	8	29		16.0909
total touches (level 8 excluding X-1)					0	12							0	0	1		12	2					1				7	2	6		3.90909
total touches (level 8 excluding X-2)					0	6							1	0	1		4	6					2				9	2	10		3.72727
total touches (level 8 excluding X-3)					3	3							1	3	0		3	6					4				8	4	7		3.81818
total touches (level 8 excluding X-4)					0	2							4	0	1		2	6					10				4	0	4		3
total touches (level 8 excluding X-5)					0	1							0	0	2		1	4					7				1	0	2		1.63636
total touches (level 9)													12				22	38					16					23			22.2
total touches (level 9-1)													1				4	0					3					1			1.8
total touches (level 9-2)													3				2	6					4					5			4
total touches (level 9-3)													4				8	7					3					9			6.2
total touches (level 9-4)													4				4	19					5					3			7
total touches (level 9-5)													0				4	6					1					5			3.2
total touches (level 9 excluding X)													12				22	36					16					22			21.6
total touches (level 9 excluding X-1)													1				4	0					3					1			1.8
total touches (level 9 excluding X-2)													3				2	4					4					5			3.6
total touches (level 9 excluding X-3)													4				8	7					3					9			6.2
total touches (level 9 excluding X-4)													4				4	19					5					3			7
total touches (level 9 excluding X-5)													0				4	6					1					4			3
total touches (level 10)																	2	8					15					7			8
total touches (level 10-1)																	0	0					1					0			0.25
total touches (level 10-2)																	1	1					5					0			1.75
total touches (level 10-3)																	1	2					6					1			2.5
total touches (level 10-4)																	0	5					2					3			2.5
total touches (level 10-5)																	0	0					1					3			1
total touches (level 10 excluding X)																	2	7					15					7			7.75
total touches (level 10 excluding X-1)																	0	0					1					0			0.25
total touches (level 10 excluding X-2)																	1	1					5					0			1.75
total touches (level 10 excluding X-3)																	1	2					6					1			2.5
total touches (level 10 excluding X-4)																	0	4					2					3			2.25
total touches (level 10 excluding X-5)																	0	0					1					3			1
total touches (level 11)																		13													13
total touches (level 11-1)																		4													4
total touches (level 11-2)																		2													2
total touches (level 11-3)																		5													5
total touches (level 11-4)																		2													2
total touches (level 11-5)																		0													0
total touches (level 11 excluding X)																		13													13
total touches (level 11 excluding X-1)																		4													4
total touches (level 11 excluding X-2)																		2													2
total touches (level 11 excluding X-3)																		5													5
total touches (level 11 excluding X-4)																		2													2
total touches (level 11 excluding X-5)																		0													0
Dog ID
block color
total touches (all)
total touches (all-1)
total touches (all-2)
total touches (all-3)
total touches (all-4)
total touches (all-5)
total touches (all-blue)
total touches (all-yellow)
total touches (all-left 2 [1/2])
total touches (all-right 2 [4/5])
total touches (excluding X)
total touches (excluding X-1)
total touches (excluding X-2)
total touches (excluding X-3)
total touches (excluding X-4)
total touches (excluding X-5)
total touches (excluding X-blue)
total touches (excluding X-yellow)
total touches (excluding X-left 2 [1/2])
total touches (excluding X-right 2 [4/5])
total touches (training)
total touches (training-1)
total touches (training-2)
total touches (training-3)
total touches (training-4)
total touches (training-5)
total touches (training excluding X)
total touches (training excluding X-1)
total touches (training excluding X-2)
total touches (training excluding X-3)
total touches (training excluding X-4)
total touches (training excluding X-5)
Dog ID
block color
total touches (all)
total touches (all-1)
total touches (all-2)
total touches (all-3)
total touches (all-4)
total touches (all-5)
total touches (all-blue)
total touches (all-yellow)
total touches (all-left 2 [1/2])
total touches (all-right 2 [4/5])
total touches (excluding X)
total touches (excluding X-1)
total touches (excluding X-2)
total touches (excluding X-3)
total touches (excluding X-4)
total touches (excluding X-5)
total touches (excluding X-blue)
total touches (excluding X-yellow)
total touches (excluding X-left 2 [1/2])
total touches (excluding X-right 2 [4/5])
total touches (training)
total touches (training-1)
total touches (training-2)
total touches (training-3)
total touches (training-4)
total touches (training-5)
total touches (training excluding X)
total touches (training excluding X-1)
total touches (training excluding X-2)
total touches (training excluding X-3)
total touches (training excluding X-4)
total touches (training excluding X-5)
Dog ID
block color
total touches (all)
total touches (all-1)
total touches (all-2)
total touches (all-3)
total touches (all-4)
total touches (all-5)
total touches (all-blue)
total touches (all-yellow)
total touches (all-left 2 [1/2])
total touches (all-right 2 [4/5])
total touches (excluding X)
total touches (excluding X-1)
total touches (excluding X-2)
total touches (excluding X-3)
total touches (excluding X-4)
total touches (excluding X-5)
total touches (excluding X-blue)
total touches (excluding X-yellow)
total touches (excluding X-left 2 [1/2])
total touches (excluding X-right 2 [4/5])
total touches (training)
total touches (training-1)
total touches (training-2)
total touches (training-3)
total touches (training-4)
total touches (training-5)
total touches (training excluding X)
total touches (training excluding X-1)
total touches (training excluding X-2)
total touches (training excluding X-3)
total touches (training excluding X-4)
total touches (training excluding X-5)
Dog ID
block color
total touches (all)
total touches (all-1)
total touches (all-2)
total touches (all-3)
total touches (all-4)
total touches (all-5)
total touches (all-blue)
total touches (all-yellow)
total touches (all-left 2 [1/2])
total touches (all-right 2 [4/5])
total touches (excluding X)
total touches (excluding X-1)
total touches (excluding X-2)
total touches (excluding X-3)
total touches (excluding X-4)
total touches (excluding X-5)
total touches (excluding X-blue)
total touches (excluding X-yellow)
total touches (excluding X-left 2 [1/2])
total touches (excluding X-right 2 [4/5])
total touches (training)
total touches (training-1)
total touches (training-2)
total touches (training-3)
total touches (training-4)
total touches (training-5)
total touches (training excluding X)
total touches (training excluding X-1)
total touches (training excluding X-2)
total touches (training excluding X-3)
total touches (training excluding X-4)
total touches (training excluding X-5)
Dog ID
block color
total touches (all)
total touches (all-1)
total touches (all-2)
total touches (all-3)
total touches (all-4)
total touches (all-5)
total touches (all-blue)
total touches (all-yellow)
total touches (all-left 2 [1/2])
total touches (all-right 2 [4/5])
total touches (excluding X)
total touches (excluding X-1)
total touches (excluding X-2)
total touches (excluding X-3)
total touches (excluding X-4)
total touches (excluding X-5)
total touches (excluding X-blue)
total touches (excluding X-yellow)
total touches (excluding X-left 2 [1/2])
total touches (excluding X-right 2 [4/5])
total touches (training)
total touches (training-1)
total touches (training-2)
total touches (training-3)
total touches (training-4)
total touches (training-5)
total touches (training excluding X)
total touches (training excluding X-1)
total touches (training excluding X-2)
total touches (training excluding X-3)
total touches (training excluding X-4)
total touches (training excluding X-5)
Dog ID
block color
total touches (all)
total touches (all-1)
total touches (all-2)
total touches (all-3)
total touches (all-4)
total touches (all-5)
total touches (all-blue)
total touches (all-yellow)
total touches (all-left 2 [1/2])
total touches (all-right 2 [4/5])
total touches (excluding X)
total touches (excluding X-1)
total touches (excluding X-2)
total touches (excluding X-3)
total touches (excluding X-4)
total touches (excluding X-5)
total touches (excluding X-blue)
total touches (excluding X-yellow)
total touches (excluding X-left 2 [1/2])
total touches (excluding X-right 2 [4/5])
total touches (training)
total touches (training-1)
total touches (training-2)
total touches (training-3)
total touches (training-4)
total touches (training-5)
total touches (training excluding X)
total touches (training excluding X-1)
total touches (training excluding X-2)
total touches (training excluding X-3)
total touches (training excluding X-4)
total touches (training excluding X-5)
Dog ID
block color
total touches (all)
total touches (all-1)
total touches (all-2)
total touches (all-3)
total touches (all-4)
total touches (all-5)
total touches (all-blue)
total touches (all-yellow)
total touches (all-left 2 [1/2])
total touches (all-right 2 [4/5])
total touches (excluding X)
total touches (excluding X-1)
total touches (excluding X-2)
total touches (excluding X-3)
total touches (excluding X-4)
total touches (excluding X-5)
total touches (excluding X-blue)
total touches (excluding X-yellow)
total touches (excluding X-left 2 [1/2])
total touches (excluding X-right 2 [4/5])
total touches (training)
total touches (training-1)
total touches (training-2)
total touches (training-3)
total touches (training-4)
total touches (training-5)
total touches (training excluding X)
total touches (training excluding X-1)
total touches (training excluding X-2)
total touches (training excluding X-3)
total touches (training excluding X-4)
total touches (training excluding X-5)
Dog ID
block color
total touches (all)
total touches (all-1)
total touches (all-2)
total touches (all-3)
total touches (all-4)
total touches (all-5)
total touches (all-blue)
total touches (all-yellow)
total touches (all-left 2 [1/2])
total touches (all-right 2 [4/5])
total touches (excluding X)
total touches (excluding X-1)
total touches (excluding X-2)
total touches (excluding X-3)
total touches (excluding X-4)
total touches (excluding X-5)
total touches (excluding X-blue)
total touches (excluding X-yellow)
total touches (excluding X-left 2 [1/2])
total touches (excluding X-right 2 [4/5])
total touches (training)
total touches (training-1)
total touches (training-2)
total touches (training-3)
total touches (training-4)
total touches (training-5)
total touches (training excluding X)
total touches (training excluding X-1)
total touches (training excluding X-2)
total touches (training excluding X-3)
total touches (training excluding X-4)
total touches (training excluding X-5)
Dog ID
block color
total touches (all)
total touches (all-1)
total touches (all-2)
total touches (all-3)
total touches (all-4)
total touches (all-5)
total touches (all-blue)
total touches (all-yellow)
total touches (all-left 2 [1/2])
total touches (all-right 2 [4/5])
total touches (excluding X)
total touches (excluding X-1)
total touches (excluding X-2)
total touches (excluding X-3)
total touches (excluding X-4)
total touches (excluding X-5)
total touches (excluding X-blue)
total touches (excluding X-yellow)
total touches (excluding X-left 2 [1/2])
total touches (excluding X-right 2 [4/5])
total touches (training)
total touches (training-1)
total touches (training-2)
total touches (training-3)
total touches (training-4)
total touches (training-5)
total touches (training excluding X)
total touches (training excluding X-1)
total touches (training excluding X-2)
total touches (training excluding X-3)
total touches (training excluding X-4)
total touches (training excluding X-5)
Dog ID
block color
total touches (all)
total touches (all-1)
total touches (all-2)
total touches (all-3)
total touches (all-4)
total touches (all-5)
total touches (all-blue)
total touches (all-yellow)
total touches (all-left 2 [1/2])
total touches (all-right 2 [4/5])
total touches (excluding X)
total touches (excluding X-1)
total touches (excluding X-2)
total touches (excluding X-3)
total touches (excluding X-4)
total touches (excluding X-5)
total touches (excluding X-blue)
total touches (excluding X-yellow)
total touches (excluding X-left 2 [1/2])
total touches (excluding X-right 2 [4/5])
total touches (training)
total touches (training-1)
total touches (training-2)
total touches (training-3)
total touches (training-4)
total touches (training-5)
total touches (training excluding X)
total touches (training excluding X-1)
total touches (training excluding X-2)
total touches (training excluding X-3)
total touches (training excluding X-4)
total touches (training excluding X-5)
Dog ID
block color
total touches (all)
total touches (all-1)
total touches (all-2)
total touches (all-3)
total touches (all-4)
total touches (all-5)
total touches (all-blue)
total touches (all-yellow)
total touches (all-left 2 [1/2])
total touches (all-right 2 [4/5])
total touches (excluding X)
total touches (excluding X-1)
total touches (excluding X-2)
total touches (excluding X-3)
total touches (excluding X-4)
total touches (excluding X-5)
total touches (excluding X-blue)
total touches (excluding X-yellow)
total touches (excluding X-left 2 [1/2])
total touches (excluding X-right 2 [4/5])
total touches (training)
total touches (training-1)
total touches (training-2)
total touches (training-3)
total touches (training-4)
total touches (training-5)
total touches (training excluding X)
total touches (training excluding X-1)
total touches (training excluding X-2)
total touches (training excluding X-3)
total touches (training excluding X-4)
total touches (training excluding X-5)
Dog ID
block color
total touches (all)
total touches (all-1)
total touches (all-2)
total touches (all-3)
total touches (all-4)
total touches (all-5)
total touches (all-blue)
total touches (all-yellow)
total touches (all-left 2 [1/2])
total touches (all-right 2 [4/5])
total touches (excluding X)
total touches (excluding X-1)
total touches (excluding X-2)
total touches (excluding X-3)
total touches (excluding X-4)
total touches (excluding X-5)
total touches (excluding X-blue)
total touches (excluding X-yellow)
total touches (excluding X-left 2 [1/2])
total touches (excluding X-right 2 [4/5])
total touches (training)
total touches (training-1)
total touches (training-2)
total touches (training-3)
total touches (training-4)
total touches (training-5)
total touches (training excluding X)
total touches (training excluding X-1)
total touches (training excluding X-2)
total touches (training excluding X-3)
total touches (training excluding X-4)
total touches (training excluding X-5)
Dog ID
block color
total touches (all)
total touches (all-1)
total touches (all-2)
total touches (all-3)
total touches (all-4)
total touches (all-5)
total touches (all-blue)
total touches (all-yellow)
total touches (all-left 2 [1/2])
total touches (all-right 2 [4/5])
total touches (excluding X)
total touches (excluding X-1)
total touches (excluding X-2)
total touches (excluding X-3)
total touches (excluding X-4)
total touches (excluding X-5)
total touches (excluding X-blue)
total touches (excluding X-yellow)
total touches (excluding X-left 2 [1/2])
total touches (excluding X-right 2 [4/5])
total touches (training)
total touches (training-1)
total touches (training-2)
total touches (training-3)
total touches (training-4)
total touches (training-5)
total touches (training excluding X)
total touches (training excluding X-1)
total touches (training excluding X-2)
total touches (training excluding X-3)
total touches (training excluding X-4)
total touches (training excluding X-5)
Dog ID
block color
total touches (all)
total touches (all-1)
total touches (all-2)
total touches (all-3)
total touches (all-4)
total touches (all-5)
total touches (all-blue)
total touches (all-yellow)
total touches (all-left 2 [1/2])
total touches (all-right 2 [4/5])
total touches (excluding X)
total touches (excluding X-1)
total touches (excluding X-2)
total touches (excluding X-3)
total touches (excluding X-4)
total touches (excluding X-5)
total touches (excluding X-blue)
total touches (excluding X-yellow)
total touches (excluding X-left 2 [1/2])
total touches (excluding X-right 2 [4/5])
total touches (training)
total touches (training-1)
total touches (training-2)
total touches (training-3)
total touches (training-4)
total touches (training-5)
total touches (training excluding X)
total touches (training excluding X-1)
total touches (training excluding X-2)
total touches (training excluding X-3)
total touches (training excluding X-4)
total touches (training excluding X-5)
Dog ID
block color
total touches (all)
total touches (all-1)
total touches (all-2)
total touches (all-3)
total touches (all-4)
total touches (all-5)
total touches (all-blue)
total touches (all-yellow)
total touches (all-left 2 [1/2])
total touches (all-right 2 [4/5])
total touches (excluding X)
total touches (excluding X-1)
total touches (excluding X-2)
total touches (excluding X-3)
total touches (excluding X-4)
total touches (excluding X-5)
total touches (excluding X-blue)
total touches (excluding X-yellow)
total touches (excluding X-left 2 [1/2])
total touches (excluding X-right 2 [4/5])
total touches (training)
total touches (training-1)
total touches (training-2)
total touches (training-3)
total touches (training-4)
total touches (training-5)
total touches (training excluding X)
total touches (training excluding X-1)
total touches (training excluding X-2)
total touches (training excluding X-3)
total touches (training excluding X-4)
total touches (training excluding X-5)
Dog ID
block color
total touches (all)
total touches (all-1)
total touches (all-2)
total touches (all-3)
total touches (all-4)
total touches (all-5)
total touches (all-blue)
total touches (all-yellow)
total touches (all-left 2 [1/2])
total touches (all-right 2 [4/5])
total touches (excluding X)
total touches (excluding X-1)
total touches (excluding X-2)
total touches (excluding X-3)
total touches (excluding X-4)
total touches (excluding X-5)
total touches (excluding X-blue)
total touches (excluding X-yellow)
total touches (excluding X-left 2 [1/2])
total touches (excluding X-right 2 [4/5])
total touches (training)
total touches (training-1)
total touches (training-2)
total touches (training-3)
total touches (training-4)
total touches (training-5)
total touches (training excluding X)
total touches (training excluding X-1)
total touches (training excluding X-2)
total touches (training excluding X-3)
total touches (training excluding X-4)
total touches (training excluding X-5)
Dog ID
block color
total touches (all)
total touches (all-1)
total touches (all-2)
total touches (all-3)
total touches (all-4)
total touches (all-5)
total touches (all-blue)
total touches (all-yellow)
total touches (all-left 2 [1/2])
total touches (all-right 2 [4/5])
total touches (excluding X)
total touches (excluding X-1)
total touches (excluding X-2)
total touches (excluding X-3)
total touches (excluding X-4)
total touches (excluding X-5)
total touches (excluding X-blue)
total touches (excluding X-yellow)
total touches (excluding X-left 2 [1/2])
total touches (excluding X-right 2 [4/5])
total touches (training)
total touches (training-1)
total touches (training-2)
total touches (training-3)
total touches (training-4)
total touches (training-5)
total touches (training excluding X)
total touches (training excluding X-1)
total touches (training excluding X-2)
total touches (training excluding X-3)
total touches (training excluding X-4)
total touches (training excluding X-5)
Dog ID
block color
total touches (all)
total touches (all-1)
total touches (all-2)
total touches (all-3)
total touches (all-4)
total touches (all-5)
total touches (all-blue)
total touches (all-yellow)
total touches (all-left 2 [1/2])
total touches (all-right 2 [4/5])
total touches (excluding X)
total touches (excluding X-1)
total touches (excluding X-2)
total touches (excluding X-3)
total touches (excluding X-4)
total touches (excluding X-5)
total touches (excluding X-blue)
total touches (excluding X-yellow)
total touches (excluding X-left 2 [1/2])
total touches (excluding X-right 2 [4/5])
total touches (training)
total touches (training-1)
total touches (training-2)
total touches (training-3)
total touches (training-4)
total touches (training-5)
total touches (training excluding X)
total touches (training excluding X-1)
total touches (training excluding X-2)
total touches (training excluding X-3)
total touches (training excluding X-4)
total touches (training excluding X-5)
Dog ID
block color
total touches (all)
total touches (all-1)
total touches (all-2)
total touches (all-3)
total touches (all-4)
total touches (all-5)
total touches (all-blue)
total touches (all-yellow)
total touches (all-left 2 [1/2])
total touches (all-right 2 [4/5])
total touches (excluding X)
total touches (excluding X-1)
total touches (excluding X-2)
total touches (excluding X-3)
total touches (excluding X-4)
total touches (excluding X-5)
total touches (excluding X-blue)
total touches (excluding X-yellow)
total touches (excluding X-left 2 [1/2])
total touches (excluding X-right 2 [4/5])
total touches (training)
total touches (training-1)
total touches (training-2)
total touches (training-3)
total touches (training-4)
total touches (training-5)
total touches (training excluding X)
total touches (training excluding X-1)
total touches (training excluding X-2)
total touches (training excluding X-3)
total touches (training excluding X-4)
total touches (training excluding X-5)
Dog ID
block color
total touches (all)
total touches (all-1)
total touches (all-2)
total touches (all-3)
total touches (all-4)
total touches (all-5)
total touches (all-blue)
total touches (all-yellow)
total touches (all-left 2 [1/2])
total touches (all-right 2 [4/5])
total touches (excluding X)
total touches (excluding X-1)
total touches (excluding X-2)
total touches (excluding X-3)
total touches (excluding X-4)
total touches (excluding X-5)
total touches (excluding X-blue)
total touches (excluding X-yellow)
total touches (excluding X-left 2 [1/2])
total touches (excluding X-right 2 [4/5])
total touches (training)
total touches (training-1)
total touches (training-2)
total touches (training-3)
total touches (training-4)
total touches (training-5)
total touches (training excluding X)
total touches (training excluding X-1)
total touches (training excluding X-2)
total touches (training excluding X-3)
total touches (training excluding X-4)
total touches (training excluding X-5)
Dog ID
block color
total touches (all)
total touches (all-1)
total touches (all-2)
total touches (all-3)
total touches (all-4)
total touches (all-5)
total touches (all-blue)
total touches (all-yellow)
total touches (all-left 2 [1/2])
total touches (all-right 2 [4/5])
total touches (excluding X)
total touches (excluding X-1)
total touches (excluding X-2)
total touches (excluding X-3)
total touches (excluding X-4)
total touches (excluding X-5)
total touches (excluding X-blue)
total touches (excluding X-yellow)
total touches (excluding X-left 2 [1/2])
total touches (excluding X-right 2 [4/5])
total touches (training)
total touches (training-1)
total touches (training-2)
total touches (training-3)
total touches (training-4)
total touches (training-5)
total touches (training excluding X)
total touches (training excluding X-1)
total touches (training excluding X-2)
total touches (training excluding X-3)
total touches (training excluding X-4)
total touches (training excluding X-5)
Dog ID
block color
total touches (all)
total touches (all-1)
total touches (all-2)
total touches (all-3)
total touches (all-4)
total touches (all-5)
total touches (all-blue)
total touches (all-yellow)
total touches (all-left 2 [1/2])
total touches (all-right 2 [4/5])
total touches (excluding X)
total touches (excluding X-1)
total touches (excluding X-2)
total touches (excluding X-3)
total touches (excluding X-4)
total touches (excluding X-5)
total touches (excluding X-blue)
total touches (excluding X-yellow)
total touches (excluding X-left 2 [1/2])
total touches (excluding X-right 2 [4/5])
total touches (training)
total touches (training-1)
total touches (training-2)
total touches (training-3)
total touches (training-4)
total touches (training-5)
total touches (training excluding X)
total touches (training excluding X-1)
total touches (training excluding X-2)
total touches (training excluding X-3)
total touches (training excluding X-4)
total touches (training excluding X-5)
Dog ID
block color
total touches (all)
total touches (all-1)
total touches (all-2)
total touches (all-3)
total touches (all-4)
total touches (all-5)
total touches (all-blue)
total touches (all-yellow)
total touches (all-left 2 [1/2])
total touches (all-right 2 [4/5])
total touches (excluding X)
total touches (excluding X-1)
total touches (excluding X-2)
total touches (excluding X-3)
total touches (excluding X-4)
total touches (excluding X-5)
total touches (excluding X-blue)
total touches (excluding X-yellow)
total touches (excluding X-left 2 [1/2])
total touches (excluding X-right 2 [4/5])
total touches (training)
total touches (training-1)
total touches (training-2)
total touches (training-3)
total touches (training-4)
total touches (training-5)
total touches (training excluding X)
total touches (training excluding X-1)
total touches (training excluding X-2)
total touches (training excluding X-3)
total touches (training excluding X-4)
total touches (training excluding X-5)
Dog ID
block color
total touches (all)
total touches (all-1)
total touches (all-2)
total touches (all-3)
total touches (all-4)
total touches (all-5)
total touches (all-blue)
total touches (all-yellow)
total touches (all-left 2 [1/2])
total touches (all-right 2 [4/5])
total touches (excluding X)
total touches (excluding X-1)
total touches (excluding X-2)
total touches (excluding X-3)
total touches (excluding X-4)
total touches (excluding X-5)
total touches (excluding X-blue)
total touches (excluding X-yellow)
total touches (excluding X-left 2 [1/2])
total touches (excluding X-right 2 [4/5])
total touches (training)
total touches (training-1)
total touches (training-2)
total touches (training-3)
total touches (training-4)
total touches (training-5)
total touches (training excluding X)
total touches (training excluding X-1)
total touches (training excluding X-2)
total touches (training excluding X-3)
total touches (training excluding X-4)
total touches (training excluding X-5)
Dog ID
block color
total touches (all)
total touches (all-1)
total touches (all-2)
total touches (all-3)
total touches (all-4)
total touches (all-5)
total touches (all-blue)
total touches (all-yellow)
total touches (all-left 2 [1/2])
total touches (all-right 2 [4/5])
total touches (excluding X)
total touches (excluding X-1)
total touches (excluding X-2)
total touches (excluding X-3)
total touches (excluding X-4)
total touches (excluding X-5)
total touches (excluding X-blue)
total touches (excluding X-yellow)
total touches (excluding X-left 2 [1/2])
total touches (excluding X-right 2 [4/5])
total touches (training)
total touches (training-1)
total touches (training-2)
total touches (training-3)
total touches (training-4)
total touches (training-5)
total touches (training excluding X)
total touches (training excluding X-1)
total touches (training excluding X-2)
total touches (training excluding X-3)
total touches (training excluding X-4)
total touches (training excluding X-5)
Dog ID
block color
total touches (all)
total touches (all-1)
total touches (all-2)
total touches (all-3)
total touches (all-4)
total touches (all-5)
total touches (all-blue)
total touches (all-yellow)
total touches (all-left 2 [1/2])
total touches (all-right 2 [4/5])
total touches (excluding X)
total touches (excluding X-1)
total touches (excluding X-2)
total touches (excluding X-3)
total touches (excluding X-4)
total touches (excluding X-5)
total touches (excluding X-blue)
total touches (excluding X-yellow)
total touches (excluding X-left 2 [1/2])
total touches (excluding X-right 2 [4/5])
total touches (training)
total touches (training-1)
total touches (training-2)
total touches (training-3)
total touches (training-4)
total touches (training-5)
total touches (training excluding X)
total touches (training excluding X-1)
total touches (training excluding X-2)
total touches (training excluding X-3)
total touches (training excluding X-4)
total touches (training excluding X-5)
Dog ID
block color
total touches (all)
total touches (all-1)
total touches (all-2)
total touches (all-3)
total touches (all-4)
total touches (all-5)
total touches (all-blue)
total touches (all-yellow)
total touches (all-left 2 [1/2])
total touches (all-right 2 [4/5])
total touches (excluding X)
total touches (excluding X-1)
total touches (excluding X-2)
total touches (excluding X-3)
total touches (excluding X-4)
total touches (excluding X-5)
total touches (excluding X-blue)
total touches (excluding X-yellow)
total touches (excluding X-left 2 [1/2])
total touches (excluding X-right 2 [4/5])
total touches (training)
total touches (training-1)
total touches (training-2)
total touches (training-3)
total touches (training-4)
total touches (training-5)
total touches (training excluding X)
total touches (training excluding X-1)
total touches (training excluding X-2)
total touches (training excluding X-3)
total touches (training excluding X-4)
total touches (training excluding X-5)
Dog ID
block color
total touches (all)
total touches (all-1)
total touches (all-2)
total touches (all-3)
total touches (all-4)
total touches (all-5)
total touches (all-blue)
total touches (all-yellow)
total touches (all-left 2 [1/2])
total touches (all-right 2 [4/5])
total touches (excluding X)
total touches (excluding X-1)
total touches (excluding X-2)
total touches (excluding X-3)
total touches (excluding X-4)
total touches (excluding X-5)
total touches (excluding X-blue)
total touches (excluding X-yellow)
total touches (excluding X-left 2 [1/2])
total touches (excluding X-right 2 [4/5])
total touches (training)
total touches (training-1)
total touches (training-2)
total touches (training-3)
total touches (training-4)
total touches (training-5)
total touches (training excluding X)
total touches (training excluding X-1)
total touches (training excluding X-2)
total touches (training excluding X-3)
total touches (training excluding X-4)
total touches (training excluding X-5)
Dog ID
block color
total touches (all)
total touches (all-1)
total touches (all-2)
total touches (all-3)
total touches (all-4)
total touches (all-5)
total touches (all-blue)
total touches (all-yellow)
total touches (all-left 2 [1/2])
total touches (all-right 2 [4/5])
total touches (excluding X)
total touches (excluding X-1)
total touches (excluding X-2)
total touches (excluding X-3)
total touches (excluding X-4)
total touches (excluding X-5)
total touches (excluding X-blue)
total touches (excluding X-yellow)
total touches (excluding X-left 2 [1/2])
total touches (excluding X-right 2 [4/5])
total touches (training)
total touches (training-1)
total touches (training-2)
total touches (training-3)
total touches (training-4)
total touches (training-5)
total touches (training excluding X)
total touches (training excluding X-1)
total touches (training excluding X-2)
total touches (training excluding X-3)
total touches (training excluding X-4)
total touches (training excluding X-5)
Dog ID
block color
total touches (all)
total touches (all-1)
total touches (all-2)
total touches (all-3)
total touches (all-4)
total touches (all-5)
total touches (all-blue)
total touches (all-yellow)
total touches (all-left 2 [1/2])
total touches (all-right 2 [4/5])
total touches (excluding X)
total touches (excluding X-1)
total touches (excluding X-2)
total touches (excluding X-3)
total touches (excluding X-4)
total touches (excluding X-5)
total touches (excluding X-blue)
total touches (excluding X-yellow)
total touches (excluding X-left 2 [1/2])
total touches (excluding X-right 2 [4/5])
total touches (training)
total touches (training-1)
total touches (training-2)
total touches (training-3)
total touches (training-4)
total touches (training-5)
total touches (training excluding X)
total touches (training excluding X-1)
total touches (training excluding X-2)
total touches (training excluding X-3)
total touches (training excluding X-4)
total touches (training excluding X-5)
Dog ID
block color
total touches (all)
total touches (all-1)
total touches (all-2)
total touches (all-3)
total touches (all-4)
total touches (all-5)
total touches (all-blue)
total touches (all-yellow)
total touches (all-left 2 [1/2])
total touches (all-right 2 [4/5])
total touches (excluding X)
total touches (excluding X-1)
total touches (excluding X-2)
total touches (excluding X-3)
total touches (excluding X-4)
total touches (excluding X-5)
total touches (excluding X-blue)
total touches (excluding X-yellow)
total touches (excluding X-left 2 [1/2])
total touches (excluding X-right 2 [4/5])
total touches (training)
total touches (training-1)
total touches (training-2)
total touches (training-3)
total touches (training-4)
total touches (training-5)
total touches (training excluding X)
total touches (training excluding X-1)
total touches (training excluding X-2)
total touches (training excluding X-3)
total touches (training excluding X-4)
total touches (training excluding X-5)
Dog ID
block color
total touches (all)
total touches (all-1)
total touches (all-2)
total touches (all-3)
total touches (all-4)
total touches (all-5)
total touches (all-blue)
total touches (all-yellow)
total touches (all-left 2 [1/2])
total touches (all-right 2 [4/5])
total touches (excluding X)
total touches (excluding X-1)
total touches (excluding X-2)
total touches (excluding X-3)
total touches (excluding X-4)
total touches (excluding X-5)
total touches (excluding X-blue)
total touches (excluding X-yellow)
total touches (excluding X-left 2 [1/2])
total touches (excluding X-right 2 [4/5])
total touches (training)
total touches (training-1)
total touches (training-2)
total touches (training-3)
total touches (training-4)
total touches (training-5)
total touches (training excluding X)
total touches (training excluding X-1)
total touches (training excluding X-2)
total touches (training excluding X-3)
total touches (training excluding X-4)
total touches (training excluding X-5)
Dog ID
block color
total touches (all)
total touches (all-1)
total touches (all-2)
total touches (all-3)
total touches (all-4)
total touches (all-5)
total touches (all-blue)
total touches (all-yellow)
total touches (all-left 2 [1/2])
total touches (all-right 2 [4/5])
total touches (excluding X)
total touches (excluding X-1)
total touches (excluding X-2)
total touches (excluding X-3)
total touches (excluding X-4)
total touches (excluding X-5)
total touches (excluding X-blue)
total touches (excluding X-yellow)
total touches (excluding X-left 2 [1/2])
total touches (excluding X-right 2 [4/5])
total touches (training)
total touches (training-1)
total touches (training-2)
total touches (training-3)
total touches (training-4)
total touches (training-5)
total touches (training excluding X)
total touches (training excluding X-1)
total touches (training excluding X-2)
total touches (training excluding X-3)
total touches (training excluding X-4)
total touches (training excluding X-5)
Dog ID
block color
total touches (all)
total touches (all-1)
total touches (all-2)
total touches (all-3)
total touches (all-4)
total touches (all-5)
total touches (all-blue)
total touches (all-yellow)
total touches (all-left 2 [1/2])
total touches (all-right 2 [4/5])
total touches (excluding X)
total touches (excluding X-1)
total touches (excluding X-2)
total touches (excluding X-3)
total touches (excluding X-4)
total touches (excluding X-5)
total touches (excluding X-blue)
total touches (excluding X-yellow)
total touches (excluding X-left 2 [1/2])
total touches (excluding X-right 2 [4/5])
total touches (training)
total touches (training-1)
total touches (training-2)
total touches (training-3)
total touches (training-4)
total touches (training-5)
total touches (training excluding X)
total touches (training excluding X-1)
total touches (training excluding X-2)
total touches (training excluding X-3)
total touches (training excluding X-4)
total touches (training excluding X-5)
Dog ID
block color
total touches (all)
total touches (all-1)
total touches (all-2)
total touches (all-3)
total touches (all-4)
total touches (all-5)
total touches (all-blue)
total touches (all-yellow)
total touches (all-left 2 [1/2])
total touches (all-right 2 [4/5])
total touches (excluding X)
total touches (excluding X-1)
total touches (excluding X-2)
total touches (excluding X-3)
total touches (excluding X-4)
total touches (excluding X-5)
total touches (excluding X-blue)
total touches (excluding X-yellow)
total touches (excluding X-left 2 [1/2])
total touches (excluding X-right 2 [4/5])
total touches (training)
total touches (training-1)
total touches (training-2)
total touches (training-3)
total touches (training-4)
total touches (training-5)
total touches (training excluding X)
total touches (training excluding X-1)
total touches (training excluding X-2)
total touches (training excluding X-3)
total touches (training excluding X-4)
total touches (training excluding X-5)
Dog ID
block color
total touches (all)
total touches (all-1)
total touches (all-2)
total touches (all-3)
total touches (all-4)
total touches (all-5)
total touches (all-blue)
total touches (all-yellow)
total touches (all-left 2 [1/2])
total touches (all-right 2 [4/5])
total touches (excluding X)
total touches (excluding X-1)
total touches (excluding X-2)
total touches (excluding X-3)
total touches (excluding X-4)
total touches (excluding X-5)
total touches (excluding X-blue)
total touches (excluding X-yellow)
total touches (excluding X-left 2 [1/2])
total touches (excluding X-right 2 [4/5])
total touches (training)
total touches (training-1)
total touches (training-2)
total touches (training-3)
total touches (training-4)
total touches (training-5)
total touches (training excluding X)
total touches (training excluding X-1)
total touches (training excluding X-2)
total touches (training excluding X-3)
total touches (training excluding X-4)
total touches (training excluding X-5)
Dog ID
block color
total touches (all)
total touches (all-1)
total touches (all-2)
total touches (all-3)
total touches (all-4)
total touches (all-5)
total touches (all-blue)
total touches (all-yellow)
total touches (all-left 2 [1/2])
total touches (all-right 2 [4/5])
total touches (excluding X)
total touches (excluding X-1)
total touches (excluding X-2)
total touches (excluding X-3)
total touches (excluding X-4)
total touches (excluding X-5)
total touches (excluding X-blue)
total touches (excluding X-yellow)
total touches (excluding X-left 2 [1/2])
total touches (excluding X-right 2 [4/5])
total touches (training)
total touches (training-1)
total touches (training-2)
total touches (training-3)
total touches (training-4)
total touches (training-5)
total touches (training excluding X)
total touches (training excluding X-1)
total touches (training excluding X-2)
total touches (training excluding X-3)
total touches (training excluding X-4)
total touches (training excluding X-5)
Dog ID
block color
total touches (all)
total touches (all-1)
total touches (all-2)
total touches (all-3)
total touches (all-4)
total touches (all-5)
total touches (all-blue)
total touches (all-yellow)
total touches (all-left 2 [1/2])
total touches (all-right 2 [4/5])
total touches (excluding X)
total touches (excluding X-1)
total touches (excluding X-2)
total touches (excluding X-3)
total touches (excluding X-4)
total touches (excluding X-5)
total touches (excluding X-blue)
total touches (excluding X-yellow)
total touches (excluding X-left 2 [1/2])
total touches (excluding X-right 2 [4/5])
total touches (training)
total touches (training-1)
total touches (training-2)
total touches (training-3)
total touches (training-4)
total touches (training-5)
total touches (training excluding X)
total touches (training excluding X-1)
total touches (training excluding X-2)
total touches (training excluding X-3)
total touches (training excluding X-4)
total touches (training excluding X-5)
Dog ID
block color
total touches (all)
total touches (all-1)
total touches (all-2)
total touches (all-3)
total touches (all-4)
total touches (all-5)
total touches (all-blue)
total touches (all-yellow)
total touches (all-left 2 [1/2])
total touches (all-right 2 [4/5])
total touches (excluding X)
total touches (excluding X-1)
total touches (excluding X-2)
total touches (excluding X-3)
total touches (excluding X-4)
total touches (excluding X-5)
total touches (excluding X-blue)
total touches (excluding X-yellow)
total touches (excluding X-left 2 [1/2])
total touches (excluding X-right 2 [4/5])
total touches (training)
total touches (training-1)
total touches (training-2)
total touches (training-3)
total touches (training-4)
total touches (training-5)
total touches (training excluding X)
total touches (training excluding X-1)
total touches (training excluding X-2)
total touches (training excluding X-3)
total touches (training excluding X-4)
total touches (training excluding X-5)
Dog ID
block color
total touches (all)
total touches (all-1)
total touches (all-2)
total touches (all-3)
total touches (all-4)
total touches (all-5)
total touches (all-blue)
total touches (all-yellow)
total touches (all-left 2 [1/2])
total touches (all-right 2 [4/5])
total touches (excluding X)
total touches (excluding X-1)
total touches (excluding X-2)
total touches (excluding X-3)
total touches (excluding X-4)
total touches (excluding X-5)
total touches (excluding X-blue)
total touches (excluding X-yellow)
total touches (excluding X-left 2 [1/2])
total touches (excluding X-right 2 [4/5])
total touches (training)
total touches (training-1)
total touches (training-2)
total touches (training-3)
total touches (training-4)
total touches (training-5)
total touches (training excluding X)
total touches (training excluding X-1)
total touches (training excluding X-2)
total touches (training excluding X-3)
total touches (training excluding X-4)
total touches (training excluding X-5)
Dog ID
block color
total touches (all)
total touches (all-1)
total touches (all-2)
total touches (all-3)
total touches (all-4)
total touches (all-5)
total touches (all-blue)
total touches (all-yellow)
total touches (all-left 2 [1/2])
total touches (all-right 2 [4/5])
total touches (excluding X)
total touches (excluding X-1)
total touches (excluding X-2)
total touches (excluding X-3)
total touches (excluding X-4)
total touches (excluding X-5)
total touches (excluding X-blue)
total touches (excluding X-yellow)
total touches (excluding X-left 2 [1/2])
total touches (excluding X-right 2 [4/5])
total touches (training)
total touches (training-1)
total touches (training-2)
total touches (training-3)
total touches (training-4)
total touches (training-5)
total touches (training excluding X)
total touches (training excluding X-1)
total touches (training excluding X-2)
total touches (training excluding X-3)
total touches (training excluding X-4)
total touches (training excluding X-5)
Dog ID
block color
total touches (all)
total touches (all-1)
total touches (all-2)
total touches (all-3)
total touches (all-4)
total touches (all-5)
total touches (all-blue)
total touches (all-yellow)
total touches (all-left 2 [1/2])
total touches (all-right 2 [4/5])
total touches (excluding X)
total touches (excluding X-1)
total touches (excluding X-2)
total touches (excluding X-3)
total touches (excluding X-4)
total touches (excluding X-5)
total touches (excluding X-blue)
total touches (excluding X-yellow)
total touches (excluding X-left 2 [1/2])
total touches (excluding X-right 2 [4/5])
total touches (training)
total touches (training-1)
total touches (training-2)
total touches (training-3)
total touches (training-4)
total touches (training-5)
total touches (training excluding X)
total touches (training excluding X-1)
total touches (training excluding X-2)
total touches (training excluding X-3)
total touches (training excluding X-4)
total touches (training excluding X-5)
Dog ID
block color
total touches (all)
total touches (all-1)
total touches (all-2)
total touches (all-3)
total touches (all-4)
total touches (all-5)
total touches (all-blue)
total touches (all-yellow)
total touches (all-left 2 [1/2])
total touches (all-right 2 [4/5])
total touches (excluding X)
total touches (excluding X-1)
total touches (excluding X-2)
total touches (excluding X-3)
total touches (excluding X-4)
total touches (excluding X-5)
total touches (excluding X-blue)
total touches (excluding X-yellow)
total touches (excluding X-left 2 [1/2])
total touches (excluding X-right 2 [4/5])
total touches (training)
total touches (training-1)
total touches (training-2)
total touches (training-3)
total touches (training-4)
total touches (training-5)
total touches (training excluding X)
total touches (training excluding X-1)
total touches (training excluding X-2)
total touches (training excluding X-3)
total touches (training excluding X-4)
total touches (training excluding X-5)
Dog ID
block color
total touches (all)
total touches (all-1)
total touches (all-2)
total touches (all-3)
total touches (all-4)
total touches (all-5)
total touches (all-blue)
total touches (all-yellow)
total touches (all-left 2 [1/2])
total touches (all-right 2 [4/5])
total touches (excluding X)
total touches (excluding X-1)
total touches (excluding X-2)
total touches (excluding X-3)
total touches (excluding X-4)
total touches (excluding X-5)
total touches (excluding X-blue)
total touches (excluding X-yellow)
total touches (excluding X-left 2 [1/2])
total touches (excluding X-right 2 [4/5])
total touches (training)
total touches (training-1)
total touches (training-2)
total touches (training-3)
total touches (training-4)
total touches (training-5)
total touches (training excluding X)
total touches (training excluding X-1)
total touches (training excluding X-2)
total touches (training excluding X-3)
total touches (training excluding X-4)
total touches (training excluding X-5)
Dog ID
block color
total touches (all)
total touches (all-1)
total touches (all-2)
total touches (all-3)
total touches (all-4)
total touches (all-5)
total touches (all-blue)
total touches (all-yellow)
total touches (all-left 2 [1/2])
total touches (all-right 2 [4/5])
total touches (excluding X)
total touches (excluding X-1)
total touches (excluding X-2)
total touches (excluding X-3)
total touches (excluding X-4)
total touches (excluding X-5)
total touches (excluding X-blue)
total touches (excluding X-yellow)
total touches (excluding X-left 2 [1/2])
total touches (excluding X-right 2 [4/5])
total touches (training)
total touches (training-1)
total touches (training-2)
total touches (training-3)
total touches (training-4)
total touches (training-5)
total touches (training excluding X)
total touches (training excluding X-1)
total touches (training excluding X-2)
total touches (training excluding X-3)
total touches (training excluding X-4)
total touches (training excluding X-5)
Dog ID
block color
total touches (all)
total touches (all-1)
total touches (all-2)
total touches (all-3)
total touches (all-4)
total touches (all-5)
total touches (all-blue)
total touches (all-yellow)
total touches (all-left 2 [1/2])
total touches (all-right 2 [4/5])
total touches (excluding X)
total touches (excluding X-1)
total touches (excluding X-2)
total touches (excluding X-3)
total touches (excluding X-4)
total touches (excluding X-5)
total touches (excluding X-blue)
total touches (excluding X-yellow)
total touches (excluding X-left 2 [1/2])
total touches (excluding X-right 2 [4/5])
total touches (training)
total touches (training-1)
total touches (training-2)
total touches (training-3)
total touches (training-4)
total touches (training-5)
total touches (training excluding X)
total touches (training excluding X-1)
total touches (training excluding X-2)
total touches (training excluding X-3)
total touches (training excluding X-4)
total touches (training excluding X-5)
Dog ID
block color
total touches (all)
total touches (all-1)
total touches (all-2)
total touches (all-3)
total touches (all-4)
total touches (all-5)
total touches (all-blue)
total touches (all-yellow)
total touches (all-left 2 [1/2])
total touches (all-right 2 [4/5])
total touches (excluding X)
total touches (excluding X-1)
total touches (excluding X-2)
total touches (excluding X-3)
total touches (excluding X-4)
total touches (excluding X-5)
total touches (excluding X-blue)
total touches (excluding X-yellow)
total touches (excluding X-left 2 [1/2])
total touches (excluding X-right 2 [4/5])
total touches (training)
total touches (training-1)
total touches (training-2)
total touches (training-3)
total touches (training-4)
total touches (training-5)
total touches (training excluding X)
total touches (training excluding X-1)
total touches (training excluding X-2)
total touches (training excluding X-3)
total touches (training excluding X-4)
total touches (training excluding X-5)
Dog ID
block color
total touches (all)
total touches (all-1)
total touches (all-2)
total touches (all-3)
total touches (all-4)
total touches (all-5)
total touches (all-blue)
total touches (all-yellow)
total touches (all-left 2 [1/2])
total touches (all-right 2 [4/5])
total touches (excluding X)
total touches (excluding X-1)
total touches (excluding X-2)
total touches (excluding X-3)
total touches (excluding X-4)
total touches (excluding X-5)
total touches (excluding X-blue)
total touches (excluding X-yellow)
total touches (excluding X-left 2 [1/2])
total touches (excluding X-right 2 [4/5])
total touches (training)
total touches (training-1)
total touches (training-2)
total touches (training-3)
total touches (training-4)
total touches (training-5)
total touches (training excluding X)
total touches (training excluding X-1)
total touches (training excluding X-2)
total touches (training excluding X-3)
total touches (training excluding X-4)
total touches (training excluding X-5)
Dog ID
block color
total touches (all)
total touches (all-1)
total touches (all-2)
total touches (all-3)
total touches (all-4)
total touches (all-5)
total touches (all-blue)
total touches (all-yellow)
total touches (all-left 2 [1/2])
total touches (all-right 2 [4/5])
total touches (excluding X)
total touches (excluding X-1)
total touches (excluding X-2)
total touches (excluding X-3)
total touches (excluding X-4)
total touches (excluding X-5)
total touches (excluding X-blue)
total touches (excluding X-yellow)
total touches (excluding X-left 2 [1/2])
total touches (excluding X-right 2 [4/5])
total touches (training)
total touches (training-1)
total touches (training-2)
total touches (training-3)
total touches (training-4)
total touches (training-5)
total touches (training excluding X)
total touches (training excluding X-1)
total touches (training excluding X-2)
total touches (training excluding X-3)
total touches (training excluding X-4)
total touches (training excluding X-5)
Dog ID
block color
total touches (all)
total touches (all-1)
total touches (all-2)
total touches (all-3)
total touches (all-4)
total touches (all-5)
total touches (all-blue)
total touches (all-yellow)
total touches (all-left 2 [1/2])
total touches (all-right 2 [4/5])
total touches (excluding X)
total touches (excluding X-1)
total touches (excluding X-2)
total touches (excluding X-3)
total touches (excluding X-4)
total touches (excluding X-5)
total touches (excluding X-blue)
total touches (excluding X-yellow)
total touches (excluding X-left 2 [1/2])
total touches (excluding X-right 2 [4/5])
total touches (training)
total touches (training-1)
total touches (training-2)
total touches (training-3)
total touches (training-4)
total touches (training-5)
total touches (training excluding X)
total touches (training excluding X-1)
total touches (training excluding X-2)
total touches (training excluding X-3)
total touches (training excluding X-4)
total touches (training excluding X-5)
Dog ID
block color
total touches (all)
total touches (all-1)
total touches (all-2)
total touches (all-3)
total touches (all-4)
total touches (all-5)
total touches (all-blue)
total touches (all-yellow)
total touches (all-left 2 [1/2])
total touches (all-right 2 [4/5])
total touches (excluding X)
total touches (excluding X-1)
total touches (excluding X-2)
total touches (excluding X-3)
total touches (excluding X-4)
total touches (excluding X-5)
total touches (excluding X-blue)
total touches (excluding X-yellow)
total touches (excluding X-left 2 [1/2])
total touches (excluding X-right 2 [4/5])
total touches (training)
total touches (training-1)
total touches (training-2)
total touches (training-3)
total touches (training-4)
total touches (training-5)
total touches (training excluding X)
total touches (training excluding X-1)
total touches (training excluding X-2)
total touches (training excluding X-3)
total touches (training excluding X-4)
total touches (training excluding X-5)
Dog ID
block color
total touches (all)
total touches (all-1)
total touches (all-2)
total touches (all-3)
total touches (all-4)
total touches (all-5)
total touches (all-blue)
total touches (all-yellow)
total touches (all-left 2 [1/2])
total touches (all-right 2 [4/5])
total touches (excluding X)
total touches (excluding X-1)
total touches (excluding X-2)
total touches (excluding X-3)
total touches (excluding X-4)
total touches (excluding X-5)
total touches (excluding X-blue)
total touches (excluding X-yellow)
total touches (excluding X-left 2 [1/2])
total touches (excluding X-right 2 [4/5])
total touches (training)
total touches (training-1)
total touches (training-2)
total touches (training-3)
total touches (training-4)
total touches (training-5)
total touches (training excluding X)
total touches (training excluding X-1)
total touches (training excluding X-2)
total touches (training excluding X-3)
total touches (training excluding X-4)
total touches (training excluding X-5)
Dog ID
block color
total touches (all)
total touches (all-1)
total touches (all-2)
total touches (all-3)
total touches (all-4)
total touches (all-5)
total touches (all-blue)
total touches (all-yellow)
total touches (all-left 2 [1/2])
total touches (all-right 2 [4/5])
total touches (excluding X)
total touches (excluding X-1)
total touches (excluding X-2)
total touches (excluding X-3)
total touches (excluding X-4)
total touches (excluding X-5)
total touches (excluding X-blue)
total touches (excluding X-yellow)
total touches (excluding X-left 2 [1/2])
total touches (excluding X-right 2 [4/5])
total touches (training)
total touches (training-1)
total touches (training-2)
total touches (training-3)
total touches (training-4)
total touches (training-5)
total touches (training excluding X)
total touches (training excluding X-1)
total touches (training excluding X-2)
total touches (training excluding X-3)
total touches (training excluding X-4)
total touches (training excluding X-5)
Dog ID
block color
total touches (all)
total touches (all-1)
total touches (all-2)
total touches (all-3)
total touches (all-4)
total touches (all-5)
total touches (all-blue)
total touches (all-yellow)
total touches (all-left 2 [1/2])
total touches (all-right 2 [4/5])
total touches (excluding X)
total touches (excluding X-1)
total touches (excluding X-2)
total touches (excluding X-3)
total touches (excluding X-4)
total touches (excluding X-5)
total touches (excluding X-blue)
total touches (excluding X-yellow)
total touches (excluding X-left 2 [1/2])
total touches (excluding X-right 2 [4/5])
total touches (training)
total touches (training-1)
total touches (training-2)
total touches (training-3)
total touches (training-4)
total touches (training-5)
total touches (training excluding X)
total touches (training excluding X-1)
total touches (training excluding X-2)
total touches (training excluding X-3)
[truncated: 308 more rows]

## Sheet: E3_clicker_touches
Dog ID	A#555390	A#550228	A#554177	A#553956	A#552966	A#553955	A#553741	A#554857	A#555036	A#554903	A#553328	A#555381	A#555474	A#553329	A#548691	A#552242	A#548849	A#552958	A#554858	A#554668	A#552841	A#555476	A#552655	A#565562	A#568048	A#569010	A#569403	A#568239	A#569180	A#569195		averages
block majority color	blue	blue	yellow	yellow	blue	blue	blue	yellow	yellow	blue	yellow	yellow	blue	yellow	yellow	blue	blue	yellow	blue	yellow	yellow	blue	blue	yellow	blue	yellow	yellow	yellow	blue	blue
total touches (all)	137	189	78	265	49	217	165	151	166	208	46	77	116	93	75	113	66	107	70	123	129	50	66	118	118	141	149	84	98	122		119.533
total touches (all-1)	22	12	6	40	2	13	18	9	28	18	3	5	9	8	6	11	3	14	1	15	22	3	3	6	12	17	31	27	12	8		12.8
total touches (all-2)	39	46	18	63	8	62	41	26	41	51	7	7	36	12	25	28	14	31	9	15	15	6	12	15	31	34	26	3	22	42		26.1667
total touches (all-3)	31	62	33	60	15	54	43	59	58	46	27	30	31	52	19	34	19	17	22	39	59	8	21	51	16	54	35	28	24	27		35.8
total touches (all-4)	31	52	16	53	20	70	51	39	24	64	6	16	32	15	15	30	21	27	28	25	22	27	23	34	34	18	31	11	26	37		29.9333
total touches (all-5)	14	17	5	49	4	18	12	18	15	29	3	19	8	6	10	10	9	18	10	29	11	6	7	12	25	18	26	15	14	8		14.8333
total touches (all-blue)	67	91	34	116	21	85	73	65	65	93	13	23	48	27	40	55	31	58	33	40	37	17	31	49	53	52	57	14	50	43		49.3667
total touches (all-yellow)	70	98	44	149	28	132	92	86	101	115	33	54	68	66	35	58	35	49	37	83	92	33	35	69	65	89	92	70	48	79		70.1667
total touches (all-left 2 [1/2])	61	58	24	103	10	75	59	35	69	69	10	12	45	20	31	39	17	45	10	30	37	9	15	21	43	51	57	30	34	50		38.9667
total touches (all-right 2 [4/5])	45	69	21	102	24	88	63	57	39	93	9	35	40	21	25	40	30	45	38	54	33	33	30	46	59	36	57	26	40	45		44.7667
total touches (excluding X)	135	141	56	158	41	156	136	134	116	162	38	64	89	75	46	98	48	91	62	115	111	42	64	98	113	130	141	79	77	104		97.3333
total touches (excluding X-1)	21	9	5	21	2	10	15	9	19	13	2	5	7	6	5	8	2	11	1	15	18	3	3	4	12	16	29	24	12	7		10.4667
total touches (excluding X-2)	39	37	13	41	5	47	34	23	23	38	7	6	27	12	13	23	10	27	7	14	14	6	12	14	28	30	26	3	18	37		21.1333
total touches (excluding X-3)	31	42	24	33	13	39	36	52	45	37	23	23	20	41	13	33	13	14	18	37	50	4	20	42	16	51	34	26	21	25		29.2
total touches (excluding X-4)	31	40	10	32	17	48	41	36	18	51	4	13	27	11	11	26	15	24	26	24	18	25	22	29	33	18	29	11	16	28		24.4667
total touches (excluding X-5)	13	13	4	31	4	12	10	14	11	23	2	17	8	5	4	8	8	15	10	25	11	4	7	9	24	15	23	15	10	7		12.0667
total touches (excluding X-blue)	65	64	23	73	19	61	61	59	41	73	11	19	35	23	24	49	23	51	29	38	32	11	30	43	52	48	55	14	43	39		40.2667
total touches (excluding X-yellow)	70	77	33	85	22	95	75	75	75	89	27	45	54	52	22	49	25	40	33	77	79	31	34	55	61	82	86	65	34	65		57.0667
total touches (excluding X-left 2 [1/2])	60	46	18	62	7	57	49	32	42	51	9	11	34	18	18	31	12	38	8	29	32	9	15	18	40	46	55	27	30	44		31.6
total touches (excluding X-right 2 [4/5])	44	53	14	63	21	60	51	50	29	74	6	30	35	16	15	34	23	39	36	49	29	29	29	38	57	33	52	26	26	35		36.5333
total touches (training)	8	17	19	37	32	24	37	24	15	34	38	24	45	35	16	15	18	25	11	20	20	23	21	19	31	17	30	19	24	48		24.8667
total touches (training-1)	1	3	3	3	2	3	3	2	2	2	3	5	4	3	5	1	1	6	1	5	3	3	3	5	4	4	8	1	5	4		3.26667
total touches (training-2)	3	4	2	7	5	3	8	4	3	6	6	6	12	4	2	4	5	2	3	3	2	5	3	6	7	2	5	1	6	17		4.86667
total touches (training-3)	2	5	9	15	8	4	7	7	4	5	21	8	12	18	3	4	3	8	3	4	13	4	5	4	3	9	6	9	6	9		7.26667
total touches (training-4)	1	3	3	5	14	11	15	4	2	14	5	3	14	5	3	5	6	5	2	3	1	9	8	2	10	1	4	5	4	10		5.9
total touches (training-5)	1	2	2	7	3	3	4	7	4	7	3	2	3	5	3	1	3	4	2	5	1	2	2	2	7	1	7	3	3	8		3.56667
total touches (training excluding X)	8	12	18	32	29	17	33	19	9	32	32	19	31	31	16	12	15	21	11	18	19	21	21	13	31	17	28	19	22	46		21.7333
total touches (training excluding X-1)	1	2	3	2	2	2	3	2	1	2	2	5	2	3	5	1	1	5	1	5	3	3	3	3	4	4	8	1	5	4		2.93333
total touches (training excluding X-2)	3	3	2	5	4	2	8	2	1	5	6	5	8	4	2	4	4	2	3	2	2	5	3	5	7	2	5	1	6	17		4.26667
total touches (training excluding X-3)	2	3	8	13	8	3	7	7	4	5	18	7	7	16	3	3	3	6	3	4	12	3	5	3	3	9	6	9	5	9		6.46667
total touches (training excluding X-4)	1	2	3	5	12	8	11	4	1	13	4	1	11	4	3	3	5	4	2	3	1	8	8	1	10	1	4	5	3	9		5
total touches (training excluding X-5)	1	2	2	7	3	2	4	4	2	7	2	1	3	4	3	1	2	4	2	4	1	2	2	1	7	1	5	3	3	7		3.06667
total touches (level 1)	5	6	9	11	7	8	11	5	6	10	5	7	8	5	8	8	8	7	8	5	9	6	4	6	5	5	5	5	6	4		6.73333
total touches (level 1-1)	0	0	0	4	0	0	0	0	0	0	0	0	0	1	0	4	2	4	0	0	2	0	0	0	0	0	1	1	0	0		0.633333
total touches (level 1-2)	0	1	1	6	3	1	5	0	0	3	1	0	3	0	8	2	2	2	0	0	0	0	0	0	0	2	0	0	0	1		1.36667
total touches (level 1-3)	0	3	5	1	1	0	6	3	6	2	4	4	3	4	0	0	4	1	4	3	7	2	1	4	0	3	1	4	1	1		2.6
total touches (level 1-4)	3	2	3	0	3	7	0	2	0	5	0	1	2	0	0	0	0	0	4	0	0	3	2	2	3	0	2	0	4	2		1.66667
total touches (level 1-5)	2	0	0	0	0	0	0	0	0	0	0	2	0	0	0	2	0	0	0	2	0	1	1	0	2	0	1	0	1	0		0.466667
total touches (level 1 excluding X)	4	4	4	4	4	4	4	4	4	4	4	4	4	4	4	4	4	4	4	4	4	4	4	4	4	4	4	4	4	4		4
total touches (level 1 excluding X-1)	0	0	0	1	0	0	0	0	0	0	0	0	0	1	0	2	1	2	0	0	1	0	0	0	0	0	1	1	0	0		0.333333
total touches (level 1 excluding X-2)	0	1	0	3	1	1	2	0	0	1	1	0	1	0	4	1	1	2	0	0	0	0	0	0	0	2	0	0	0	1		0.733333
total touches (level 1 excluding X-3)	0	2	3	0	1	0	2	2	4	1	3	2	1	3	0	0	2	0	2	3	3	0	1	2	0	2	1	3	1	1		1.5
total touches (level 1 excluding X-4)	3	1	1	0	2	3	0	2	0	2	0	1	2	0	0	0	0	0	2	0	0	3	2	2	2	0	1	0	2	2		1.1
total touches (level 1 excluding X-5)	1	0	0	0	0	0	0	0	0	0	0	1	0	0	0	1	0	0	0	1	0	1	1	0	2	0	1	0	1	0		0.333333
total touches (level 2)	5	8	6	16	6	10	6	6	11	6	3	11	6	8	9	9	7	7	5	7	6	6	5	12	6	8	4	6	12	6		7.43333
total touches (level 2-1)	0	0	0	3	0	0	0	0	1	0	0	0	0	0	0	1	0	1	0	0	0	0	0	0	0	0	0	0	0	0		0.2
total touches (level 2-2)	2	1	5	6	0	2	0	0	4	2	0	0	3	0	7	4	3	3	0	0	2	0	0	0	0	5	1	0	3	3		1.86667
total touches (level 2-3)	0	5	1	7	3	1	1	4	6	3	2	7	1	8	2	1	0	0	4	1	2	0	1	6	1	2	2	4	3	1		2.63333
total touches (level 2-4)	2	2	0	0	2	7	5	2	0	1	1	2	2	0	0	2	3	3	1	4	2	4	3	4	3	0	1	0	4	2		2.06667
total touches (level 2-5)	1	0	0	0	1	0	0	0	0	0	0	2	0	0	0	1	1	0	0	2	0	2	1	2	2	1	0	2	2	0		0.666667
total touches (level 2 excluding X)	5	4	4	6	5	4	4	4	5	4	2	6	4	4	4	5	5	5	4	5	4	4	5	5	6	5	4	6	6	4		4.6
total touches (level 2 excluding X-1)	0	0	0	2	0	0	0	0	1	0	0	0	0	0	0	1	0	1	0	0	0	0	0	0	0	0	0	0	0	0		0.166667
total touches (level 2 excluding X-2)	2	1	3	3	0	1	0	0	1	1	0	0	2	0	3	2	2	2	0	0	2	0	0	0	0	3	1	0	2	2		1.1
total touches (level 2 excluding X-3)	0	2	1	1	2	0	1	2	3	2	2	3	1	4	1	1	0	0	3	1	1	0	1	2	1	1	2	4	1	1		1.46667
total touches (level 2 excluding X-4)	2	1	0	0	2	3	3	2	0	1	0	1	1	0	0	1	2	2	1	3	1	4	3	2	3	0	1	0	1	1		1.36667
total touches (level 2 excluding X-5)	1	0	0	0	1	0	0	0	0	0	0	2	0	0	0	0	1	0	0	1	0	0	1	1	2	1	0	2	2	0		0.5
total touches (level 3)	12	11	16	11	4	16	14	29	15	11		35	13	11	14	16	27	14	43	17	23	6	10	9	11	11	6	8	15	10		15.1034
total touches (level 3-1)	0	0	1	4	0	0	1	0	4	0		0	3	0	0	0	0	1	0	1	2	0	0	0	0	0	0	1	1	0		0.655172
total touches (level 3-2)	4	1	2	3	0	3	3	4	4	1		1	2	0	6	5	4	6	6	3	2	1	3	0	6	2	1	0	4	6		2.86207
total touches (level 3-3)	4	2	5	4	3	3	3	10	4	4		11	3	5	7	4	12	5	9	8	13	0	3	3	3	3	1	3	7	1		4.93103
total touches (level 3-4)	4	8	8	0	1	10	7	9	1	6		10	4	6	1	5	6	2	20	1	5	5	3	3	2	3	4	1	3	3		4.86207
total touches (level 3-5)	0	0	0	0	0	0	0	6	2	0		13	1	0	0	2	5	0	8	4	1	0	1	3	0	3	0	3	0	0		1.7931
total touches (level 3 excluding X)	12	7	12	5	3	10	14	28	10	8		35	12	9	9	15	22	11	40	17	21	5	10	7	9	9	6	8	14	8		12.9655
total touches (level 3 excluding X-1)	0	0	1	1	0	0	1	0	3	0		0	3	0	0	0	0	1	0	1	2	0	0	0	0	0	0	1	1	0		0.517241
total touches (level 3 excluding X-2)	4	1	2	3	0	3	3	4	1	1		1	2	0	4	4	3	3	4	3	2	1	3	0	4	2	1	0	3	4		2.27586
total touches (level 3 excluding X-3)	4	2	5	1	2	3	3	9	3	3		11	3	5	4	4	8	5	8	8	13	0	3	3	3	3	1	3	7	1		4.41379
total touches (level 3 excluding X-4)	4	4	4	0	1	4	7	9	1	4		10	3	4	1	5	6	2	20	1	3	4	3	2	2	3	4	1	3	3		4.06897
total touches (level 3 excluding X-5)	0	0	0	0	0	0	0	6	2	0		13	1	0	0	2	5	0	8	4	1	0	1	2	0	1	0	3	0	0		1.68966
total touches (level 4)	10	15	14	22		14	6	18	14	10			13	20	12	13	6	21	3	7	16	9	9	34	12	12	9	17	12	12		13.3333
total touches (level 4-1)	1	0	0	2		0	0	6	1	1			0	4	0	0	0	1	0	1	5	0	0	0	1	0	2	4	0	0		1.07407
total touches (level 4-2)	3	4	5	7		6	0	2	2	6			4	2	1	3	0	14	0	1	2	0	4	4	4	4	2	0	2	3		3.14815
total touches (level 4-3)	2	5	6	2		5	0	4	5	3			5	10	2	5	0	2	2	1	6	2	4	18	2	5	2	4	3	3		4
total touches (level 4-4)	4	5	2	8		3	6	4	4	0			2	3	6	5	6	3	1	3	2	6	1	10	1	2	2	3	5	6		3.81481
total touches (level 4-5)	0	1	1	3		0	0	2	2	0			2	1	3	0	0	1	0	1	1	1	0	2	4	1	1	6	2	0		1.2963
total touches (level 4 excluding X)	10	14	11	15		11	4	16	11	7			12	18	5	12	2	21	3	7	13	8	9	34	11	12	9	17	9	8		11.4444
total touches (level 4 excluding X-1)	1	0	0	2		0	0	6	1	1			0	2	0	0	0	1	0	1	3	0	0	0	1	0	2	4	0	0		0.925926
total touches (level 4 excluding X-2)	3	4	4	7		4	0	2	2	3			4	2	0	3	0	14	0	1	1	0	4	4	4	4	2	0	2	2		2.81481
total touches (level 4 excluding X-3)	2	4	4	2		4	0	4	4	3			4	10	1	5	0	2	2	1	6	1	4	18	2	5	2	4	3	2		3.66667
total touches (level 4 excluding X-4)	4	5	2	2		3	4	3	3	0			2	3	4	4	2	3	1	3	2	6	1	10	1	2	2	3	3	4		3.03704
total touches (level 4 excluding X-5)	0	1	1	2		0	0	1	1	0			2	1	0	0	0	1	0	1	1	1	0	2	3	1	1	6	1	0		1
total touches (level 5)	11	14	12	15		15	10	6	8	14			12	14	11	11		9		9	7		6	8	9	6	6	10	10	13		10.25
total touches (level 5-1)	4	0	2	0		0	0	0	0	2			2	0	1	2		0		0	4		0	1	0	0	3	7	0	2		1.25
total touches (level 5-2)	5	3	3	0		4	0	0	0	3			3	6	1	2		1		1	2		1	1	0	1	1	1	1	3		1.79167
total touches (level 5-3)	1	11	5	4		8	6	5	7	4			5	7	4	3		0		4	0		5	3	1	5	2	0	1	3		3.91667
total touches (level 5-4)	1	0	0	5		3	4	1	1	4			2	1	3	4		2		3	0		0	3	5	0	0	2	2	5		2.125
total touches (level 5-5)	0	0	2	6		0	0	0	0	1			0	0	2	0		6		1	1		0	0	3	0	0	0	6	0		1.16667
total touches (level 5 excluding X)	10	7	6	7		11	8	5	5	9			9	9	5	10		7		9	6		5	8	9	5	5	7	6	11		7.45833
total touches (level 5 excluding X-1)	3	0	1	0		0	0	0	0	1			2	0	0	1		0		0	3		0	1	0	0	2	4	0	1		0.791667
total touches (level 5 excluding X-2)	5	3	2	0		4	0	0	0	3			3	6	0	2		1		1	2		1	1	0	1	1	1	1	3		1.70833
total touches (level 5 excluding X-3)	1	4	2	1		4	4	4	4	2			2	3	3	3		0		4	0		4	3	1	4	2	0	1	3		2.45833
total touches (level 5 excluding X-4)	1	0	0	3		3	4	1	1	2			2	0	1	4		2		3	0		0	3	5	0	0	2	1	4		1.75
total touches (level 5 excluding X-5)	0	0	1	3		0	0	0	0	1			0	0	1	0		4		1	1		0	0	3	0	0	0	3	0		0.75
total touches (level 6)	6	11	2	21		10	9	15	10	10			7		5	8		9		10	10		8	10	11	7	13	19	11	11		10.1304
total touches (level 6-1)	2	0	0	3		0	0	1	2	0			0		0	0		1		0	0		0	0	0	1	3	13	3	0		1.26087
total touches (level 6-2)	3	7	0	5		6	3	4	3	4			6		0	3		1		1	0		1	2	3	2	1	1	3	3		2.69565
total touches (level 6-3)	0	4	2	4		2	3	8	1	2			1		1	2		1		5	3		2	5	2	1	4	4	2	5		2.78261
total touches (level 6-4)	1	0	0	6		2	3	2	2	3			0		2	2		4		3	5		4	3	1	2	4	0	3	3		2.3913
total touches (level 6-5)	0	0	0	3		0	0	0	2	1			0		2	1		2		1	2		1	0	5	1	1	1	0	0		1
total touches (level 6 excluding X)	6	6	1	13		5	7	12	9	5			5		3	7		8		8	9		7	8	11	7	11	18	9	9		8
total touches (level 6 excluding X-1)	2	0	0	3		0	0	1	2	0			0		0	0		1		0	0		0	0	0	1	3	13	3	0		1.26087
total touches (level 6 excluding X-2)	3	4	0	2		3	2	3	3	2			4		0	2		1		1	0		1	2	3	2	1	1	2	2		1.91304
total touches (level 6 excluding X-3)	0	2	1	4		1	3	7	1	0			1		1	2		1		4	3		2	4	2	1	4	3	2	5		2.34783
total touches (level 6 excluding X-4)	1	0	0	3		1	2	1	1	2			0		2	2		3		3	4		3	2	1	2	3	0	2	2		1.73913
total touches (level 6 excluding X-5)	0	0	0	1		0	0	0	2	1			0		0	1		2		0	2		1	0	5	1	0	1	0	0		0.73913
total touches (level 7)	8	18		32		17	18	24	12	16			12			22		14		12	7		3	16	10	12	13		8	18		14.6
total touches (level 7-1)	1	0		4		0	7	0	0	1			0			2		0		1	0		0	0	1	5	1		3	2		1.4
total touches (level 7-2)	2	4		5		3	6	4	0	4			3			3		2		0	0		0	2	5	3	1		3	6		2.8
total touches (level 7-3)	4	7		13		9	3	11	7	2			1			10		0		6	7		0	5	1	4	1		1	4		4.8
total touches (level 7-4)	1	7		5		4	2	7	4	7			6			5		7		4	0		2	6	3	0	4		1	6		4.05
total touches (level 7-5)	0	0		5		1	0	2	1	2			2			2		5		1	0		1	3	0	0	6		0	0		1.55
total touches (level 7 excluding X)	8	14		19		11	15	24	8	12			12			22		13		11	4		3	15	9	11	13		7	14		12.25
total touches (level 7 excluding X-1)	1	0		2		0	4	0	0	1			0			2		0		1	0		0	0	1	4	1		3	2		1.1
total touches (level 7 excluding X-2)	2	4		3		3	6	4	0	4			3			3		2		0	0		0	2	4	3	1		2	6		2.6
total touches (level 7 excluding X-3)	4	6		4		4	3	11	4	2			1			10		0		5	4		0	4	1	4	1		1	3		3.6
total touches (level 7 excluding X-4)	1	4		5		3	2	7	3	4			6			5		7		4	0		2	6	3	0	4		1	3		3.5
total touches (level 7 excluding X-5)	0	0		5		1	0	2	1	1			2			2		4		1	0		1	3	0	0	6		0	0		1.45
total touches (level 8)	10	13		19		29	12	13	17	25						11		1		20	14			4	14	15	15					14.5
total touches (level 8-1)	4	0		1		0	3	0	1	1						1		0		4	1			0	4	3	5					1.75
total touches (level 8-2)	3	0		2		6	7	8	4	4						2		0		4	0			0	4	6	3					3.3125
total touches (level 8-3)	1	5		3		7	2	5	4	3						5		0		5	5			3	3	4	3					3.625
total touches (level 8-4)	1	7		10		7	0	0	6	8						2		1		4	4			1	2	1	2					3.5
total touches (level 8-5)	1	1		3		9	0	0	2	9						1		0		3	4			0	1	1	2					2.3125
total touches (level 8 excluding X)	10	11		11		24	9	12	14	19						11		1		20	14			4	14	14	14					12.625
total touches (level 8 excluding X-1)	4	0		1		0	3	0	1	1						1		0		4	1			0	4	3	4					1.6875
total touches (level 8 excluding X-2)	3	0		2		6	4	8	4	4						2		0		4	0			0	4	5	3					3.0625
total touches (level 8 excluding X-3)	1	4		2		7	2	4	4	3						5		0		5	5			3	3	4	3					3.4375
total touches (level 8 excluding X-4)	1	6		4		7	0	0	4	7						2		1		4	4			1	2	1	2					2.875
total touches (level 8 excluding X-5)	1	1		2		4	0	0	1	4						1		0		3	4			0	1	1	2					1.5625
total touches (level 9)	18	41		33		25	13	6	24	28										16	14				9	10	16					19.4615
total touches (level 9-1)	3	3		2		0	2	0	9	1										3	4				2	1	3					2.53846
total touches (level 9-2)	4	8		4		8	4	0	6	8										2	4				2	3	4					4.38462
total touches (level 9-3)	4	10		4		6	5	1	4	4										2	2				0	4	3					3.76923
total touches (level 9-4)	3	12		8		7	2	5	3	8										0	3				4	1	3					4.53846
total touches (level 9-5)	4	8		15		4	0	0	2	7										9	1				1	1	3					4.23077
total touches (level 9 excluding X)	18	36		17		19	12	5	16	24										16	14				9	9	16					16.2308
total touches (level 9 excluding X-1)	3	3		2		0	2	0	4	1										3	4				2	1	3					2.15385
total touches (level 9 excluding X-2)	4	8		4		4	4	0	3	4										2	4				2	2	4					3.46154
total touches (level 9 excluding X-3)	4	10		2		4	4	1	4	4										2	2				0	4	3					3.38462
total touches (level 9 excluding X-4)	3	11		5		7	2	4	3	8										0	3				4	1	3					4.15385
total touches (level 9 excluding X-5)	4	4		4		4	0	0	2	7										9	1				1	1	3					3.07692
total touches (level 10)	25	25		37		29	25	5	19	16											3					24	19					20.6364
total touches (level 10-1)	4	6		12		6	2	0	5	2											1					3	2					3.90909
total touches (level 10-2)	4	6		10		14	5	0	11	3											1					3	4					5.54545
total touches (level 10-3)	7	2		3		7	7	1	3	6											1					10	5					4.72727
total touches (level 10-4)	6	6		5		2	5	3	0	4											0					4	4					3.54545
total touches (level 10-5)	4	5		7		0	6	1	0	1											0					4	4					2.90909
total touches (level 10 excluding X)	25	21		24		23	23	5	10	14											3					24	19					17.3636
total touches (level 10 excluding X-1)	4	4		4		4	2	0	3	2											1					3	2					2.63636
total touches (level 10 excluding X-2)	4	4		5		10	5	0	4	3											1					3	4					3.90909
total touches (level 10 excluding X-3)	7	2		3		7	7	1	3	4											1					10	5					4.54545
total touches (level 10 excluding X-4)	6	6		5		2	5	3	0	4											0					4	4					3.54545
total touches (level 10 excluding X-5)	4	5		7		0	4	1	0	1											0					4	4					2.72727
total touches (level 11)	19	10		11		20	4		15	28																14	13					14.8889
total touches (level 11-1)	2	0		2		4	0		3	8																0	3					2.44444
total touches (level 11-2)	6	7		8		6	0		4	7																1	3					4.66667
total touches (level 11-3)	6	3		0		2	0		7	8																4	5					3.88889
total touches (level 11-4)	4	0		1		7	2		1	4																4	1					2.66667
total touches (level 11-5)	1	0		0		1	2		0	1																5	1					1.22222
total touches (level 11 excluding X)	19	5		5		17	3		15	24																13	12					12.5556
total touches (level 11 excluding X-1)	2	0		1		4	0		3	4																0	3					1.88889
total touches (level 11 excluding X-2)	6	4		4		6	0		4	7																1	3					3.88889
total touches (level 11 excluding X-3)	6	1		0		2	0		7	8																4	4					3.55556
total touches (level 11 excluding X-4)	4	0		0		4	1		1	4																4	1					2.11111
total touches (level 11 excluding X-5)	1	0		0		1	2		0	1																4	1					1.11111
Dog ID
block color
total touches (all)
total touches (all-1)
total touches (all-2)
total touches (all-3)
total touches (all-4)
total touches (all-5)
total touches (all-blue)
total touches (all-yellow)
total touches (all-left 2 [1/2])
total touches (all-right 2 [4/5])
total touches (excluding X)
total touches (excluding X-1)
total touches (excluding X-2)
total touches (excluding X-3)
total touches (excluding X-4)
total touches (excluding X-5)
total touches (excluding X-blue)
total touches (excluding X-yellow)
total touches (excluding X-left 2 [1/2])
total touches (excluding X-right 2 [4/5])
total touches (training)
total touches (training-1)
total touches (training-2)
total touches (training-3)
total touches (training-4)
total touches (training-5)
total touches (training excluding X)
total touches (training excluding X-1)
total touches (training excluding X-2)
total touches (training excluding X-3)
total touches (training excluding X-4)
total touches (training excluding X-5)
Dog ID
block color
total touches (all)
total touches (all-1)
total touches (all-2)
total touches (all-3)
total touches (all-4)
total touches (all-5)
total touches (all-blue)
total touches (all-yellow)
total touches (all-left 2 [1/2])
total touches (all-right 2 [4/5])
total touches (excluding X)
total touches (excluding X-1)
total touches (excluding X-2)
total touches (excluding X-3)
total touches (excluding X-4)
total touches (excluding X-5)
total touches (excluding X-blue)
total touches (excluding X-yellow)
total touches (excluding X-left 2 [1/2])
total touches (excluding X-right 2 [4/5])
total touches (training)
total touches (training-1)
total touches (training-2)
total touches (training-3)
total touches (training-4)
total touches (training-5)
total touches (training excluding X)
total touches (training excluding X-1)
total touches (training excluding X-2)
total touches (training excluding X-3)
total touches (training excluding X-4)
total touches (training excluding X-5)
Dog ID
block color
total touches (all)
total touches (all-1)
total touches (all-2)
total touches (all-3)
total touches (all-4)
total touches (all-5)
total touches (all-blue)
total touches (all-yellow)
total touches (all-left 2 [1/2])
total touches (all-right 2 [4/5])
total touches (excluding X)
total touches (excluding X-1)
total touches (excluding X-2)
total touches (excluding X-3)
total touches (excluding X-4)
total touches (excluding X-5)
total touches (excluding X-blue)
total touches (excluding X-yellow)
total touches (excluding X-left 2 [1/2])
total touches (excluding X-right 2 [4/5])
total touches (training)
total touches (training-1)
total touches (training-2)
total touches (training-3)
total touches (training-4)
total touches (training-5)
total touches (training excluding X)
total touches (training excluding X-1)
total touches (training excluding X-2)
total touches (training excluding X-3)
total touches (training excluding X-4)
total touches (training excluding X-5)
Dog ID
block color
total touches (all)
total touches (all-1)
total touches (all-2)
total touches (all-3)
total touches (all-4)
total touches (all-5)
total touches (all-blue)
total touches (all-yellow)
total touches (all-left 2 [1/2])
total touches (all-right 2 [4/5])
total touches (excluding X)
total touches (excluding X-1)
total touches (excluding X-2)
total touches (excluding X-3)
total touches (excluding X-4)
total touches (excluding X-5)
total touches (excluding X-blue)
total touches (excluding X-yellow)
total touches (excluding X-left 2 [1/2])
total touches (excluding X-right 2 [4/5])
total touches (training)
total touches (training-1)
total touches (training-2)
total touches (training-3)
total touches (training-4)
total touches (training-5)
total touches (training excluding X)
total touches (training excluding X-1)
total touches (training excluding X-2)
total touches (training excluding X-3)
total touches (training excluding X-4)
total touches (training excluding X-5)
Dog ID
block color
total touches (all)
total touches (all-1)
total touches (all-2)
total touches (all-3)
total touches (all-4)
total touches (all-5)
total touches (all-blue)
total touches (all-yellow)
total touches (all-left 2 [1/2])
total touches (all-right 2 [4/5])
total touches (excluding X)
total touches (excluding X-1)
total touches (excluding X-2)
total touches (excluding X-3)
total touches (excluding X-4)
total touches (excluding X-5)
total touches (excluding X-blue)
total touches (excluding X-yellow)
total touches (excluding X-left 2 [1/2])
total touches (excluding X-right 2 [4/5])
total touches (training)
total touches (training-1)
total touches (training-2)
total touches (training-3)
total touches (training-4)
total touches (training-5)
total touches (training excluding X)
total touches (training excluding X-1)
total touches (training excluding X-2)
total touches (training excluding X-3)
total touches (training excluding X-4)
total touches (training excluding X-5)
Dog ID
block color
total touches (all)
total touches (all-1)
total touches (all-2)
total touches (all-3)
total touches (all-4)
total touches (all-5)
total touches (all-blue)
total touches (all-yellow)
total touches (all-left 2 [1/2])
total touches (all-right 2 [4/5])
total touches (excluding X)
total touches (excluding X-1)
total touches (excluding X-2)
total touches (excluding X-3)
total touches (excluding X-4)
total touches (excluding X-5)
total touches (excluding X-blue)
total touches (excluding X-yellow)
total touches (excluding X-left 2 [1/2])
total touches (excluding X-right 2 [4/5])
total touches (training)
total touches (training-1)
total touches (training-2)
total touches (training-3)
total touches (training-4)
total touches (training-5)
total touches (training excluding X)
total touches (training excluding X-1)
total touches (training excluding X-2)
total touches (training excluding X-3)
total touches (training excluding X-4)
total touches (training excluding X-5)
Dog ID
block color
total touches (all)
total touches (all-1)
total touches (all-2)
total touches (all-3)
total touches (all-4)
total touches (all-5)
total touches (all-blue)
total touches (all-yellow)
total touches (all-left 2 [1/2])
total touches (all-right 2 [4/5])
total touches (excluding X)
total touches (excluding X-1)
total touches (excluding X-2)
total touches (excluding X-3)
total touches (excluding X-4)
total touches (excluding X-5)
total touches (excluding X-blue)
total touches (excluding X-yellow)
total touches (excluding X-left 2 [1/2])
total touches (excluding X-right 2 [4/5])
total touches (training)
total touches (training-1)
total touches (training-2)
total touches (training-3)
total touches (training-4)
total touches (training-5)
total touches (training excluding X)
total touches (training excluding X-1)
total touches (training excluding X-2)
total touches (training excluding X-3)
total touches (training excluding X-4)
total touches (training excluding X-5)
Dog ID
block color
total touches (all)
total touches (all-1)
total touches (all-2)
total touches (all-3)
total touches (all-4)
total touches (all-5)
total touches (all-blue)
total touches (all-yellow)
total touches (all-left 2 [1/2])
total touches (all-right 2 [4/5])
total touches (excluding X)
total touches (excluding X-1)
total touches (excluding X-2)
total touches (excluding X-3)
total touches (excluding X-4)
total touches (excluding X-5)
total touches (excluding X-blue)
total touches (excluding X-yellow)
total touches (excluding X-left 2 [1/2])
total touches (excluding X-right 2 [4/5])
total touches (training)
total touches (training-1)
total touches (training-2)
total touches (training-3)
total touches (training-4)
total touches (training-5)
total touches (training excluding X)
total touches (training excluding X-1)
total touches (training excluding X-2)
total touches (training excluding X-3)
total touches (training excluding X-4)
total touches (training excluding X-5)
Dog ID
block color
total touches (all)
total touches (all-1)
total touches (all-2)
total touches (all-3)
total touches (all-4)
total touches (all-5)
total touches (all-blue)
total touches (all-yellow)
total touches (all-left 2 [1/2])
total touches (all-right 2 [4/5])
total touches (excluding X)
total touches (excluding X-1)
total touches (excluding X-2)
total touches (excluding X-3)
total touches (excluding X-4)
total touches (excluding X-5)
total touches (excluding X-blue)
total touches (excluding X-yellow)
total touches (excluding X-left 2 [1/2])
total touches (excluding X-right 2 [4/5])
total touches (training)
total touches (training-1)
total touches (training-2)
total touches (training-3)
total touches (training-4)
total touches (training-5)
total touches (training excluding X)
total touches (training excluding X-1)
total touches (training excluding X-2)
total touches (training excluding X-3)
total touches (training excluding X-4)
total touches (training excluding X-5)
Dog ID
block color
total touches (all)
total touches (all-1)
total touches (all-2)
total touches (all-3)
total touches (all-4)
total touches (all-5)
total touches (all-blue)
total touches (all-yellow)
total touches (all-left 2 [1/2])
total touches (all-right 2 [4/5])
total touches (excluding X)
total touches (excluding X-1)
total touches (excluding X-2)
total touches (excluding X-3)
total touches (excluding X-4)
total touches (excluding X-5)
total touches (excluding X-blue)
total touches (excluding X-yellow)
total touches (excluding X-left 2 [1/2])
total touches (excluding X-right 2 [4/5])
total touches (training)
total touches (training-1)
total touches (training-2)
total touches (training-3)
total touches (training-4)
total touches (training-5)
total touches (training excluding X)
total touches (training excluding X-1)
total touches (training excluding X-2)
total touches (training excluding X-3)
total touches (training excluding X-4)
total touches (training excluding X-5)
Dog ID
block color
total touches (all)
total touches (all-1)
total touches (all-2)
total touches (all-3)
total touches (all-4)
total touches (all-5)
total touches (all-blue)
total touches (all-yellow)
total touches (all-left 2 [1/2])
total touches (all-right 2 [4/5])
total touches (excluding X)
total touches (excluding X-1)
total touches (excluding X-2)
total touches (excluding X-3)
total touches (excluding X-4)
total touches (excluding X-5)
total touches (excluding X-blue)
total touches (excluding X-yellow)
total touches (excluding X-left 2 [1/2])
total touches (excluding X-right 2 [4/5])
total touches (training)
total touches (training-1)
total touches (training-2)
total touches (training-3)
total touches (training-4)
total touches (training-5)
total touches (training excluding X)
total touches (training excluding X-1)
total touches (training excluding X-2)
total touches (training excluding X-3)
total touches (training excluding X-4)
total touches (training excluding X-5)
Dog ID
block color
total touches (all)
total touches (all-1)
total touches (all-2)
total touches (all-3)
total touches (all-4)
total touches (all-5)
total touches (all-blue)
total touches (all-yellow)
total touches (all-left 2 [1/2])
total touches (all-right 2 [4/5])
total touches (excluding X)
total touches (excluding X-1)
total touches (excluding X-2)
total touches (excluding X-3)
total touches (excluding X-4)
total touches (excluding X-5)
total touches (excluding X-blue)
total touches (excluding X-yellow)
total touches (excluding X-left 2 [1/2])
total touches (excluding X-right 2 [4/5])
total touches (training)
total touches (training-1)
total touches (training-2)
total touches (training-3)
total touches (training-4)
total touches (training-5)
total touches (training excluding X)
total touches (training excluding X-1)
total touches (training excluding X-2)
total touches (training excluding X-3)
total touches (training excluding X-4)
total touches (training excluding X-5)
Dog ID
block color
total touches (all)
total touches (all-1)
total touches (all-2)
total touches (all-3)
total touches (all-4)
total touches (all-5)
total touches (all-blue)
total touches (all-yellow)
total touches (all-left 2 [1/2])
total touches (all-right 2 [4/5])
total touches (excluding X)
total touches (excluding X-1)
total touches (excluding X-2)
total touches (excluding X-3)
total touches (excluding X-4)
total touches (excluding X-5)
total touches (excluding X-blue)
total touches (excluding X-yellow)
total touches (excluding X-left 2 [1/2])
total touches (excluding X-right 2 [4/5])
total touches (training)
total touches (training-1)
total touches (training-2)
total touches (training-3)
total touches (training-4)
total touches (training-5)
total touches (training excluding X)
total touches (training excluding X-1)
total touches (training excluding X-2)
total touches (training excluding X-3)
total touches (training excluding X-4)
total touches (training excluding X-5)
Dog ID
block color
total touches (all)
total touches (all-1)
total touches (all-2)
total touches (all-3)
total touches (all-4)
total touches (all-5)
total touches (all-blue)
total touches (all-yellow)
total touches (all-left 2 [1/2])
total touches (all-right 2 [4/5])
total touches (excluding X)
total touches (excluding X-1)
total touches (excluding X-2)
total touches (excluding X-3)
total touches (excluding X-4)
total touches (excluding X-5)
total touches (excluding X-blue)
total touches (excluding X-yellow)
total touches (excluding X-left 2 [1/2])
total touches (excluding X-right 2 [4/5])
total touches (training)
total touches (training-1)
total touches (training-2)
total touches (training-3)
total touches (training-4)
total touches (training-5)
total touches (training excluding X)
total touches (training excluding X-1)
total touches (training excluding X-2)
total touches (training excluding X-3)
total touches (training excluding X-4)
total touches (training excluding X-5)
Dog ID
block color
total touches (all)
total touches (all-1)
total touches (all-2)
total touches (all-3)
total touches (all-4)
total touches (all-5)
total touches (all-blue)
total touches (all-yellow)
total touches (all-left 2 [1/2])
total touches (all-right 2 [4/5])
total touches (excluding X)
total touches (excluding X-1)
total touches (excluding X-2)
total touches (excluding X-3)
total touches (excluding X-4)
total touches (excluding X-5)
total touches (excluding X-blue)
total touches (excluding X-yellow)
total touches (excluding X-left 2 [1/2])
total touches (excluding X-right 2 [4/5])
total touches (training)
total touches (training-1)
total touches (training-2)
total touches (training-3)
total touches (training-4)
total touches (training-5)
total touches (training excluding X)
total touches (training excluding X-1)
total touches (training excluding X-2)
total touches (training excluding X-3)
total touches (training excluding X-4)
total touches (training excluding X-5)
Dog ID
block color
total touches (all)
total touches (all-1)
total touches (all-2)
total touches (all-3)
total touches (all-4)
total touches (all-5)
total touches (all-blue)
total touches (all-yellow)
total touches (all-left 2 [1/2])
total touches (all-right 2 [4/5])
total touches (excluding X)
total touches (excluding X-1)
total touches (excluding X-2)
total touches (excluding X-3)
total touches (excluding X-4)
total touches (excluding X-5)
total touches (excluding X-blue)
total touches (excluding X-yellow)
total touches (excluding X-left 2 [1/2])
total touches (excluding X-right 2 [4/5])
total touches (training)
total touches (training-1)
total touches (training-2)
total touches (training-3)
total touches (training-4)
total touches (training-5)
total touches (training excluding X)
total touches (training excluding X-1)
total touches (training excluding X-2)
total touches (training excluding X-3)
total touches (training excluding X-4)
total touches (training excluding X-5)
Dog ID
block color
total touches (all)
total touches (all-1)
total touches (all-2)
total touches (all-3)
total touches (all-4)
total touches (all-5)
total touches (all-blue)
total touches (all-yellow)
total touches (all-left 2 [1/2])
total touches (all-right 2 [4/5])
total touches (excluding X)
total touches (excluding X-1)
total touches (excluding X-2)
total touches (excluding X-3)
total touches (excluding X-4)
total touches (excluding X-5)
total touches (excluding X-blue)
total touches (excluding X-yellow)
total touches (excluding X-left 2 [1/2])
total touches (excluding X-right 2 [4/5])
total touches (training)
total touches (training-1)
total touches (training-2)
total touches (training-3)
total touches (training-4)
total touches (training-5)
total touches (training excluding X)
total touches (training excluding X-1)
total touches (training excluding X-2)
total touches (training excluding X-3)
total touches (training excluding X-4)
total touches (training excluding X-5)
Dog ID
block color
total touches (all)
total touches (all-1)
total touches (all-2)
total touches (all-3)
total touches (all-4)
total touches (all-5)
total touches (all-blue)
total touches (all-yellow)
total touches (all-left 2 [1/2])
total touches (all-right 2 [4/5])
total touches (excluding X)
total touches (excluding X-1)
total touches (excluding X-2)
total touches (excluding X-3)
total touches (excluding X-4)
total touches (excluding X-5)
total touches (excluding X-blue)
total touches (excluding X-yellow)
total touches (excluding X-left 2 [1/2])
total touches (excluding X-right 2 [4/5])
total touches (training)
total touches (training-1)
total touches (training-2)
total touches (training-3)
total touches (training-4)
total touches (training-5)
total touches (training excluding X)
total touches (training excluding X-1)
total touches (training excluding X-2)
total touches (training excluding X-3)
total touches (training excluding X-4)
total touches (training excluding X-5)
Dog ID
block color
total touches (all)
total touches (all-1)
total touches (all-2)
total touches (all-3)
total touches (all-4)
total touches (all-5)
total touches (all-blue)
total touches (all-yellow)
total touches (all-left 2 [1/2])
total touches (all-right 2 [4/5])
total touches (excluding X)
total touches (excluding X-1)
total touches (excluding X-2)
total touches (excluding X-3)
total touches (excluding X-4)
total touches (excluding X-5)
total touches (excluding X-blue)
total touches (excluding X-yellow)
total touches (excluding X-left 2 [1/2])
total touches (excluding X-right 2 [4/5])
total touches (training)
total touches (training-1)
total touches (training-2)
total touches (training-3)
total touches (training-4)
total touches (training-5)
total touches (training excluding X)
total touches (training excluding X-1)
total touches (training excluding X-2)
total touches (training excluding X-3)
total touches (training excluding X-4)
total touches (training excluding X-5)
Dog ID
block color
total touches (all)
total touches (all-1)
total touches (all-2)
total touches (all-3)
total touches (all-4)
total touches (all-5)
total touches (all-blue)
total touches (all-yellow)
total touches (all-left 2 [1/2])
total touches (all-right 2 [4/5])
total touches (excluding X)
total touches (excluding X-1)
total touches (excluding X-2)
total touches (excluding X-3)
total touches (excluding X-4)
total touches (excluding X-5)
total touches (excluding X-blue)
total touches (excluding X-yellow)
total touches (excluding X-left 2 [1/2])
total touches (excluding X-right 2 [4/5])
total touches (training)
total touches (training-1)
total touches (training-2)
total touches (training-3)
total touches (training-4)
total touches (training-5)
total touches (training excluding X)
total touches (training excluding X-1)
total touches (training excluding X-2)
total touches (training excluding X-3)
total touches (training excluding X-4)
total touches (training excluding X-5)
Dog ID
block color
total touches (all)
total touches (all-1)
total touches (all-2)
total touches (all-3)
total touches (all-4)
total touches (all-5)
total touches (all-blue)
total touches (all-yellow)
total touches (all-left 2 [1/2])
total touches (all-right 2 [4/5])
total touches (excluding X)
total touches (excluding X-1)
total touches (excluding X-2)
total touches (excluding X-3)
total touches (excluding X-4)
total touches (excluding X-5)
total touches (excluding X-blue)
total touches (excluding X-yellow)
total touches (excluding X-left 2 [1/2])
total touches (excluding X-right 2 [4/5])
total touches (training)
total touches (training-1)
total touches (training-2)
total touches (training-3)
total touches (training-4)
total touches (training-5)
total touches (training excluding X)
total touches (training excluding X-1)
total touches (training excluding X-2)
total touches (training excluding X-3)
total touches (training excluding X-4)
total touches (training excluding X-5)
Dog ID
block color
total touches (all)
total touches (all-1)
total touches (all-2)
total touches (all-3)
total touches (all-4)
total touches (all-5)
total touches (all-blue)
total touches (all-yellow)
total touches (all-left 2 [1/2])
total touches (all-right 2 [4/5])
total touches (excluding X)
total touches (excluding X-1)
total touches (excluding X-2)
total touches (excluding X-3)
total touches (excluding X-4)
total touches (excluding X-5)
total touches (excluding X-blue)
total touches (excluding X-yellow)
total touches (excluding X-left 2 [1/2])
total touches (excluding X-right 2 [4/5])
total touches (training)
total touches (training-1)
total touches (training-2)
total touches (training-3)
total touches (training-4)
total touches (training-5)
total touches (training excluding X)
total touches (training excluding X-1)
total touches (training excluding X-2)
total touches (training excluding X-3)
total touches (training excluding X-4)
total touches (training excluding X-5)
Dog ID
block color
total touches (all)
total touches (all-1)
total touches (all-2)
total touches (all-3)
total touches (all-4)
total touches (all-5)
total touches (all-blue)
total touches (all-yellow)
total touches (all-left 2 [1/2])
total touches (all-right 2 [4/5])
total touches (excluding X)
total touches (excluding X-1)
total touches (excluding X-2)
total touches (excluding X-3)
total touches (excluding X-4)
total touches (excluding X-5)
total touches (excluding X-blue)
total touches (excluding X-yellow)
total touches (excluding X-left 2 [1/2])
total touches (excluding X-right 2 [4/5])
total touches (training)
total touches (training-1)
total touches (training-2)
total touches (training-3)
total touches (training-4)
total touches (training-5)
total touches (training excluding X)
total touches (training excluding X-1)
total touches (training excluding X-2)
total touches (training excluding X-3)
total touches (training excluding X-4)
total touches (training excluding X-5)
Dog ID
block color
total touches (all)
total touches (all-1)
total touches (all-2)
total touches (all-3)
total touches (all-4)
total touches (all-5)
total touches (all-blue)
total touches (all-yellow)
total touches (all-left 2 [1/2])
total touches (all-right 2 [4/5])
total touches (excluding X)
total touches (excluding X-1)
total touches (excluding X-2)
total touches (excluding X-3)
total touches (excluding X-4)
total touches (excluding X-5)
total touches (excluding X-blue)
total touches (excluding X-yellow)
total touches (excluding X-left 2 [1/2])
total touches (excluding X-right 2 [4/5])
total touches (training)
total touches (training-1)
total touches (training-2)
total touches (training-3)
total touches (training-4)
total touches (training-5)
total touches (training excluding X)
total touches (training excluding X-1)
total touches (training excluding X-2)
total touches (training excluding X-3)
total touches (training excluding X-4)
total touches (training excluding X-5)
Dog ID
block color
total touches (all)
total touches (all-1)
total touches (all-2)
total touches (all-3)
total touches (all-4)
total touches (all-5)
total touches (all-blue)
total touches (all-yellow)
total touches (all-left 2 [1/2])
total touches (all-right 2 [4/5])
total touches (excluding X)
total touches (excluding X-1)
total touches (excluding X-2)
total touches (excluding X-3)
total touches (excluding X-4)
total touches (excluding X-5)
total touches (excluding X-blue)
total touches (excluding X-yellow)
total touches (excluding X-left 2 [1/2])
total touches (excluding X-right 2 [4/5])
total touches (training)
total touches (training-1)
total touches (training-2)
total touches (training-3)
total touches (training-4)
total touches (training-5)
total touches (training excluding X)
total touches (training excluding X-1)
total touches (training excluding X-2)
total touches (training excluding X-3)
total touches (training excluding X-4)
total touches (training excluding X-5)
Dog ID
block color
total touches (all)
total touches (all-1)
total touches (all-2)
total touches (all-3)
total touches (all-4)
total touches (all-5)
total touches (all-blue)
total touches (all-yellow)
total touches (all-left 2 [1/2])
total touches (all-right 2 [4/5])
total touches (excluding X)
total touches (excluding X-1)
total touches (excluding X-2)
total touches (excluding X-3)
total touches (excluding X-4)
total touches (excluding X-5)
total touches (excluding X-blue)
total touches (excluding X-yellow)
total touches (excluding X-left 2 [1/2])
total touches (excluding X-right 2 [4/5])
total touches (training)
total touches (training-1)
total touches (training-2)
total touches (training-3)
total touches (training-4)
total touches (training-5)
total touches (training excluding X)
total touches (training excluding X-1)
total touches (training excluding X-2)
total touches (training excluding X-3)
total touches (training excluding X-4)
total touches (training excluding X-5)
Dog ID
block color
total touches (all)
total touches (all-1)
total touches (all-2)
total touches (all-3)
total touches (all-4)
total touches (all-5)
total touches (all-blue)
total touches (all-yellow)
total touches (all-left 2 [1/2])
total touches (all-right 2 [4/5])
total touches (excluding X)
total touches (excluding X-1)
total touches (excluding X-2)
total touches (excluding X-3)
total touches (excluding X-4)
total touches (excluding X-5)
total touches (excluding X-blue)
total touches (excluding X-yellow)
total touches (excluding X-left 2 [1/2])
total touches (excluding X-right 2 [4/5])
total touches (training)
total touches (training-1)
total touches (training-2)
total touches (training-3)
total touches (training-4)
total touches (training-5)
total touches (training excluding X)
total touches (training excluding X-1)
total touches (training excluding X-2)
total touches (training excluding X-3)
total touches (training excluding X-4)
total touches (training excluding X-5)
Dog ID
block color
total touches (all)
total touches (all-1)
total touches (all-2)
total touches (all-3)
total touches (all-4)
total touches (all-5)
total touches (all-blue)
total touches (all-yellow)
total touches (all-left 2 [1/2])
total touches (all-right 2 [4/5])
total touches (excluding X)
total touches (excluding X-1)
total touches (excluding X-2)
total touches (excluding X-3)
total touches (excluding X-4)
total touches (excluding X-5)
total touches (excluding X-blue)
total touches (excluding X-yellow)
total touches (excluding X-left 2 [1/2])
total touches (excluding X-right 2 [4/5])
total touches (training)
total touches (training-1)
total touches (training-2)
total touches (training-3)
total touches (training-4)
total touches (training-5)
total touches (training excluding X)
total touches (training excluding X-1)
total touches (training excluding X-2)
total touches (training excluding X-3)
total touches (training excluding X-4)
total touches (training excluding X-5)
Dog ID
block color
total touches (all)
total touches (all-1)
total touches (all-2)
total touches (all-3)
total touches (all-4)
total touches (all-5)
total touches (all-blue)
total touches (all-yellow)
total touches (all-left 2 [1/2])
total touches (all-right 2 [4/5])
total touches (excluding X)
total touches (excluding X-1)
total touches (excluding X-2)
total touches (excluding X-3)
total touches (excluding X-4)
total touches (excluding X-5)
total touches (excluding X-blue)
total touches (excluding X-yellow)
total touches (excluding X-left 2 [1/2])
total touches (excluding X-right 2 [4/5])
total touches (training)
total touches (training-1)
total touches (training-2)
total touches (training-3)
total touches (training-4)
total touches (training-5)
total touches (training excluding X)
total touches (training excluding X-1)
total touches (training excluding X-2)
total touches (training excluding X-3)
total touches (training excluding X-4)
total touches (training excluding X-5)
Dog ID
block color
total touches (all)
total touches (all-1)
total touches (all-2)
total touches (all-3)
total touches (all-4)
total touches (all-5)
total touches (all-blue)
total touches (all-yellow)
total touches (all-left 2 [1/2])
total touches (all-right 2 [4/5])
total touches (excluding X)
total touches (excluding X-1)
total touches (excluding X-2)
total touches (excluding X-3)
total touches (excluding X-4)
total touches (excluding X-5)
total touches (excluding X-blue)
total touches (excluding X-yellow)
total touches (excluding X-left 2 [1/2])
total touches (excluding X-right 2 [4/5])
total touches (training)
total touches (training-1)
total touches (training-2)
total touches (training-3)
total touches (training-4)
total touches (training-5)
total touches (training excluding X)
total touches (training excluding X-1)
total touches (training excluding X-2)
total touches (training excluding X-3)
total touches (training excluding X-4)
total touches (training excluding X-5)
Dog ID
block color
total touches (all)
total touches (all-1)
total touches (all-2)
total touches (all-3)
total touches (all-4)
total touches (all-5)
total touches (all-blue)
total touches (all-yellow)
total touches (all-left 2 [1/2])
total touches (all-right 2 [4/5])
total touches (excluding X)
total touches (excluding X-1)
total touches (excluding X-2)
total touches (excluding X-3)
total touches (excluding X-4)
total touches (excluding X-5)
total touches (excluding X-blue)
total touches (excluding X-yellow)
total touches (excluding X-left 2 [1/2])
total touches (excluding X-right 2 [4/5])
total touches (training)
total touches (training-1)
total touches (training-2)
total touches (training-3)
total touches (training-4)
total touches (training-5)
total touches (training excluding X)
total touches (training excluding X-1)
total touches (training excluding X-2)
total touches (training excluding X-3)
total touches (training excluding X-4)
total touches (training excluding X-5)
Dog ID
block color
total touches (all)
total touches (all-1)
total touches (all-2)
total touches (all-3)
total touches (all-4)
total touches (all-5)
total touches (all-blue)
total touches (all-yellow)
total touches (all-left 2 [1/2])
total touches (all-right 2 [4/5])
total touches (excluding X)
total touches (excluding X-1)
total touches (excluding X-2)
total touches (excluding X-3)
total touches (excluding X-4)
total touches (excluding X-5)
total touches (excluding X-blue)
total touches (excluding X-yellow)
total touches (excluding X-left 2 [1/2])
total touches (excluding X-right 2 [4/5])
total touches (training)
total touches (training-1)
total touches (training-2)
total touches (training-3)
total touches (training-4)
total touches (training-5)
total touches (training excluding X)
total touches (training excluding X-1)
total touches (training excluding X-2)
total touches (training excluding X-3)
total touches (training excluding X-4)
total touches (training excluding X-5)
Dog ID
block color
total touches (all)
total touches (all-1)
total touches (all-2)
total touches (all-3)
total touches (all-4)
total touches (all-5)
total touches (all-blue)
total touches (all-yellow)
total touches (all-left 2 [1/2])
total touches (all-right 2 [4/5])
total touches (excluding X)
total touches (excluding X-1)
total touches (excluding X-2)
total touches (excluding X-3)
total touches (excluding X-4)
total touches (excluding X-5)
total touches (excluding X-blue)
total touches (excluding X-yellow)
total touches (excluding X-left 2 [1/2])
total touches (excluding X-right 2 [4/5])
total touches (training)
total touches (training-1)
total touches (training-2)
total touches (training-3)
total touches (training-4)
total touches (training-5)
total touches (training excluding X)
total touches (training excluding X-1)
total touches (training excluding X-2)
total touches (training excluding X-3)
total touches (training excluding X-4)
total touches (training excluding X-5)
Dog ID
block color
total touches (all)
total touches (all-1)
total touches (all-2)
total touches (all-3)
total touches (all-4)
total touches (all-5)
total touches (all-blue)
total touches (all-yellow)
total touches (all-left 2 [1/2])
total touches (all-right 2 [4/5])
total touches (excluding X)
total touches (excluding X-1)
total touches (excluding X-2)
total touches (excluding X-3)
total touches (excluding X-4)
total touches (excluding X-5)
total touches (excluding X-blue)
total touches (excluding X-yellow)
total touches (excluding X-left 2 [1/2])
total touches (excluding X-right 2 [4/5])
total touches (training)
total touches (training-1)
total touches (training-2)
total touches (training-3)
total touches (training-4)
total touches (training-5)
total touches (training excluding X)
total touches (training excluding X-1)
total touches (training excluding X-2)
total touches (training excluding X-3)
total touches (training excluding X-4)
total touches (training excluding X-5)
Dog ID
block color
total touches (all)
total touches (all-1)
total touches (all-2)
total touches (all-3)
total touches (all-4)
total touches (all-5)
total touches (all-blue)
total touches (all-yellow)
total touches (all-left 2 [1/2])
total touches (all-right 2 [4/5])
total touches (excluding X)
total touches (excluding X-1)
total touches (excluding X-2)
total touches (excluding X-3)
total touches (excluding X-4)
total touches (excluding X-5)
total touches (excluding X-blue)
total touches (excluding X-yellow)
total touches (excluding X-left 2 [1/2])
total touches (excluding X-right 2 [4/5])
total touches (training)
total touches (training-1)
total touches (training-2)
total touches (training-3)
total touches (training-4)
total touches (training-5)
total touches (training excluding X)
total touches (training excluding X-1)
total touches (training excluding X-2)
total touches (training excluding X-3)
total touches (training excluding X-4)
total touches (training excluding X-5)
Dog ID
block color
total touches (all)
total touches (all-1)
total touches (all-2)
total touches (all-3)
total touches (all-4)
total touches (all-5)
total touches (all-blue)
total touches (all-yellow)
total touches (all-left 2 [1/2])
total touches (all-right 2 [4/5])
total touches (excluding X)
total touches (excluding X-1)
total touches (excluding X-2)
total touches (excluding X-3)
total touches (excluding X-4)
total touches (excluding X-5)
total touches (excluding X-blue)
total touches (excluding X-yellow)
total touches (excluding X-left 2 [1/2])
total touches (excluding X-right 2 [4/5])
total touches (training)
total touches (training-1)
total touches (training-2)
total touches (training-3)
total touches (training-4)
total touches (training-5)
total touches (training excluding X)
total touches (training excluding X-1)
total touches (training excluding X-2)
total touches (training excluding X-3)
total touches (training excluding X-4)
total touches (training excluding X-5)
Dog ID
block color
total touches (all)
total touches (all-1)
total touches (all-2)
total touches (all-3)
total touches (all-4)
total touches (all-5)
total touches (all-blue)
total touches (all-yellow)
total touches (all-left 2 [1/2])
total touches (all-right 2 [4/5])
total touches (excluding X)
total touches (excluding X-1)
total touches (excluding X-2)
total touches (excluding X-3)
total touches (excluding X-4)
total touches (excluding X-5)
total touches (excluding X-blue)
total touches (excluding X-yellow)
total touches (excluding X-left 2 [1/2])
total touches (excluding X-right 2 [4/5])
total touches (training)
total touches (training-1)
total touches (training-2)
total touches (training-3)
total touches (training-4)
total touches (training-5)
total touches (training excluding X)
total touches (training excluding X-1)
total touches (training excluding X-2)
total touches (training excluding X-3)
total touches (training excluding X-4)
total touches (training excluding X-5)
Dog ID
block color
total touches (all)
total touches (all-1)
total touches (all-2)
total touches (all-3)
total touches (all-4)
total touches (all-5)
total touches (all-blue)
total touches (all-yellow)
total touches (all-left 2 [1/2])
total touches (all-right 2 [4/5])
total touches (excluding X)
total touches (excluding X-1)
total touches (excluding X-2)
total touches (excluding X-3)
total touches (excluding X-4)
total touches (excluding X-5)
total touches (excluding X-blue)
total touches (excluding X-yellow)
total touches (excluding X-left 2 [1/2])
total touches (excluding X-right 2 [4/5])
total touches (training)
total touches (training-1)
total touches (training-2)
total touches (training-3)
total touches (training-4)
total touches (training-5)
total touches (training excluding X)
total touches (training excluding X-1)
total touches (training excluding X-2)
total touches (training excluding X-3)
total touches (training excluding X-4)
total touches (training excluding X-5)
Dog ID
block color
total touches (all)
total touches (all-1)
total touches (all-2)
total touches (all-3)
total touches (all-4)
total touches (all-5)
total touches (all-blue)
total touches (all-yellow)
total touches (all-left 2 [1/2])
total touches (all-right 2 [4/5])
total touches (excluding X)
total touches (excluding X-1)
total touches (excluding X-2)
total touches (excluding X-3)
total touches (excluding X-4)
total touches (excluding X-5)
total touches (excluding X-blue)
total touches (excluding X-yellow)
total touches (excluding X-left 2 [1/2])
total touches (excluding X-right 2 [4/5])
total touches (training)
total touches (training-1)
total touches (training-2)
total touches (training-3)
total touches (training-4)
total touches (training-5)
total touches (training excluding X)
total touches (training excluding X-1)
total touches (training excluding X-2)
total touches (training excluding X-3)
total touches (training excluding X-4)
total touches (training excluding X-5)
Dog ID
block color
total touches (all)
total touches (all-1)
total touches (all-2)
total touches (all-3)
total touches (all-4)
total touches (all-5)
total touches (all-blue)
total touches (all-yellow)
total touches (all-left 2 [1/2])
total touches (all-right 2 [4/5])
total touches (excluding X)
total touches (excluding X-1)
total touches (excluding X-2)
total touches (excluding X-3)
total touches (excluding X-4)
total touches (excluding X-5)
total touches (excluding X-blue)
total touches (excluding X-yellow)
total touches (excluding X-left 2 [1/2])
total touches (excluding X-right 2 [4/5])
total touches (training)
total touches (training-1)
total touches (training-2)
total touches (training-3)
total touches (training-4)
total touches (training-5)
total touches (training excluding X)
total touches (training excluding X-1)
total touches (training excluding X-2)
total touches (training excluding X-3)
total touches (training excluding X-4)
total touches (training excluding X-5)
Dog ID
block color
total touches (all)
total touches (all-1)
total touches (all-2)
total touches (all-3)
total touches (all-4)
total touches (all-5)
total touches (all-blue)
total touches (all-yellow)
total touches (all-left 2 [1/2])
total touches (all-right 2 [4/5])
total touches (excluding X)
total touches (excluding X-1)
total touches (excluding X-2)
total touches (excluding X-3)
total touches (excluding X-4)
total touches (excluding X-5)
total touches (excluding X-blue)
total touches (excluding X-yellow)
total touches (excluding X-left 2 [1/2])
total touches (excluding X-right 2 [4/5])
total touches (training)
total touches (training-1)
total touches (training-2)
total touches (training-3)
total touches (training-4)
total touches (training-5)
total touches (training excluding X)
total touches (training excluding X-1)
total touches (training excluding X-2)
total touches (training excluding X-3)
total touches (training excluding X-4)
total touches (training excluding X-5)
Dog ID
block color
total touches (all)
total touches (all-1)
total touches (all-2)
total touches (all-3)
total touches (all-4)
total touches (all-5)
total touches (all-blue)
total touches (all-yellow)
total touches (all-left 2 [1/2])
total touches (all-right 2 [4/5])
total touches (excluding X)
total touches (excluding X-1)
total touches (excluding X-2)
total touches (excluding X-3)
total touches (excluding X-4)
total touches (excluding X-5)
total touches (excluding X-blue)
total touches (excluding X-yellow)
total touches (excluding X-left 2 [1/2])
total touches (excluding X-right 2 [4/5])
total touches (training)
total touches (training-1)
total touches (training-2)
total touches (training-3)
total touches (training-4)
total touches (training-5)
total touches (training excluding X)
total touches (training excluding X-1)
total touches (training excluding X-2)
total touches (training excluding X-3)
total touches (training excluding X-4)
total touches (training excluding X-5)
Dog ID
block color
total touches (all)
total touches (all-1)
total touches (all-2)
total touches (all-3)
total touches (all-4)
total touches (all-5)
total touches (all-blue)
total touches (all-yellow)
total touches (all-left 2 [1/2])
total touches (all-right 2 [4/5])
total touches (excluding X)
total touches (excluding X-1)
total touches (excluding X-2)
total touches (excluding X-3)
total touches (excluding X-4)
total touches (excluding X-5)
total touches (excluding X-blue)
total touches (excluding X-yellow)
total touches (excluding X-left 2 [1/2])
total touches (excluding X-right 2 [4/5])
total touches (training)
total touches (training-1)
total touches (training-2)
total touches (training-3)
total touches (training-4)
total touches (training-5)
total touches (training excluding X)
total touches (training excluding X-1)
total touches (training excluding X-2)
total touches (training excluding X-3)
total touches (training excluding X-4)
total touches (training excluding X-5)
Dog ID
block color
total touches (all)
total touches (all-1)
total touches (all-2)
total touches (all-3)
total touches (all-4)
total touches (all-5)
total touches (all-blue)
total touches (all-yellow)
total touches (all-left 2 [1/2])
total touches (all-right 2 [4/5])
total touches (excluding X)
total touches (excluding X-1)
total touches (excluding X-2)
total touches (excluding X-3)
total touches (excluding X-4)
total touches (excluding X-5)
total touches (excluding X-blue)
total touches (excluding X-yellow)
total touches (excluding X-left 2 [1/2])
total touches (excluding X-right 2 [4/5])
total touches (training)
total touches (training-1)
total touches (training-2)
total touches (training-3)
total touches (training-4)
total touches (training-5)
total touches (training excluding X)
total touches (training excluding X-1)
total touches (training excluding X-2)
total touches (training excluding X-3)
total touches (training excluding X-4)
total touches (training excluding X-5)
Dog ID
block color
total touches (all)
total touches (all-1)
total touches (all-2)
total touches (all-3)
total touches (all-4)
total touches (all-5)
total touches (all-blue)
total touches (all-yellow)
total touches (all-left 2 [1/2])
total touches (all-right 2 [4/5])
total touches (excluding X)
total touches (excluding X-1)
total touches (excluding X-2)
total touches (excluding X-3)
total touches (excluding X-4)
total touches (excluding X-5)
total touches (excluding X-blue)
total touches (excluding X-yellow)
total touches (excluding X-left 2 [1/2])
total touches (excluding X-right 2 [4/5])
total touches (training)
total touches (training-1)
total touches (training-2)
total touches (training-3)
total touches (training-4)
total touches (training-5)
total touches (training excluding X)
total touches (training excluding X-1)
total touches (training excluding X-2)
total touches (training excluding X-3)
total touches (training excluding X-4)
total touches (training excluding X-5)
Dog ID
block color
total touches (all)
total touches (all-1)
total touches (all-2)
total touches (all-3)
total touches (all-4)
total touches (all-5)
total touches (all-blue)
total touches (all-yellow)
total touches (all-left 2 [1/2])
total touches (all-right 2 [4/5])
total touches (excluding X)
total touches (excluding X-1)
total touches (excluding X-2)
total touches (excluding X-3)
total touches (excluding X-4)
total touches (excluding X-5)
total touches (excluding X-blue)
total touches (excluding X-yellow)
total touches (excluding X-left 2 [1/2])
total touches (excluding X-right 2 [4/5])
total touches (training)
total touches (training-1)
total touches (training-2)
total touches (training-3)
total touches (training-4)
total touches (training-5)
total touches (training excluding X)
total touches (training excluding X-1)
total touches (training excluding X-2)
total touches (training excluding X-3)
total touches (training excluding X-4)
total touches (training excluding X-5)
Dog ID
block color
total touches (all)
total touches (all-1)
total touches (all-2)
total touches (all-3)
total touches (all-4)
total touches (all-5)
total touches (all-blue)
total touches (all-yellow)
total touches (all-left 2 [1/2])
total touches (all-right 2 [4/5])
total touches (excluding X)
total touches (excluding X-1)
total touches (excluding X-2)
total touches (excluding X-3)
total touches (excluding X-4)
total touches (excluding X-5)
total touches (excluding X-blue)
total touches (excluding X-yellow)
total touches (excluding X-left 2 [1/2])
total touches (excluding X-right 2 [4/5])
total touches (training)
total touches (training-1)
total touches (training-2)
total touches (training-3)
total touches (training-4)
total touches (training-5)
total touches (training excluding X)
total touches (training excluding X-1)
total touches (training excluding X-2)
total touches (training excluding X-3)
total touches (training excluding X-4)
total touches (training excluding X-5)
Dog ID
block color
total touches (all)
total touches (all-1)
total touches (all-2)
total touches (all-3)
total touches (all-4)
total touches (all-5)
total touches (all-blue)
total touches (all-yellow)
total touches (all-left 2 [1/2])
total touches (all-right 2 [4/5])
total touches (excluding X)
total touches (excluding X-1)
total touches (excluding X-2)
total touches (excluding X-3)
total touches (excluding X-4)
total touches (excluding X-5)
total touches (excluding X-blue)
total touches (excluding X-yellow)
total touches (excluding X-left 2 [1/2])
total touches (excluding X-right 2 [4/5])
total touches (training)
total touches (training-1)
total touches (training-2)
total touches (training-3)
total touches (training-4)
total touches (training-5)
total touches (training excluding X)
total touches (training excluding X-1)
total touches (training excluding X-2)
total touches (training excluding X-3)
total touches (training excluding X-4)
total touches (training excluding X-5)
Dog ID
block color
total touches (all)
total touches (all-1)
total touches (all-2)
total touches (all-3)
total touches (all-4)
total touches (all-5)
total touches (all-blue)
total touches (all-yellow)
total touches (all-left 2 [1/2])
total touches (all-right 2 [4/5])
total touches (excluding X)
total touches (excluding X-1)
total touches (excluding X-2)
total touches (excluding X-3)
total touches (excluding X-4)
total touches (excluding X-5)
total touches (excluding X-blue)
total touches (excluding X-yellow)
total touches (excluding X-left 2 [1/2])
total touches (excluding X-right 2 [4/5])
total touches (training)
total touches (training-1)
total touches (training-2)
total touches (training-3)
total touches (training-4)
total touches (training-5)
total touches (training excluding X)
total touches (training excluding X-1)
total touches (training excluding X-2)
total touches (training excluding X-3)
total touches (training excluding X-4)
total touches (training excluding X-5)
Dog ID
block color
total touches (all)
total touches (all-1)
total touches (all-2)
total touches (all-3)
total touches (all-4)
total touches (all-5)
total touches (all-blue)
total touches (all-yellow)
total touches (all-left 2 [1/2])
total touches (all-right 2 [4/5])
total touches (excluding X)
total touches (excluding X-1)
total touches (excluding X-2)
total touches (excluding X-3)
total touches (excluding X-4)
total touches (excluding X-5)
total touches (excluding X-blue)
total touches (excluding X-yellow)
total touches (excluding X-left 2 [1/2])
total touches (excluding X-right 2 [4/5])
total touches (training)
total touches (training-1)
total touches (training-2)
total touches (training-3)
total touches (training-4)
total touches (training-5)
total touches (training excluding X)
total touches (training excluding X-1)
total touches (training excluding X-2)
total touches (training excluding X-3)
total touches (training excluding X-4)
total touches (training excluding X-5)
Dog ID
block color
total touches (all)
total touches (all-1)
total touches (all-2)
total touches (all-3)
total touches (all-4)
total touches (all-5)
total touches (all-blue)
total touches (all-yellow)
total touches (all-left 2 [1/2])
total touches (all-right 2 [4/5])
total touches (excluding X)
total touches (excluding X-1)
total touches (excluding X-2)
total touches (excluding X-3)
total touches (excluding X-4)
total touches (excluding X-5)
total touches (excluding X-blue)
total touches (excluding X-yellow)
total touches (excluding X-left 2 [1/2])
total touches (excluding X-right 2 [4/5])
total touches (training)
total touches (training-1)
total touches (training-2)
total touches (training-3)
total touches (training-4)
total touches (training-5)
total touches (training excluding X)
total touches (training excluding X-1)
total touches (training excluding X-2)
total touches (training excluding X-3)
total touches (training excluding X-4)
total touches (training excluding X-5)
Dog ID
block color
total touches (all)
total touches (all-1)
total touches (all-2)
total touches (all-3)
total touches (all-4)
total touches (all-5)
total touches (all-blue)
total touches (all-yellow)
total touches (all-left 2 [1/2])
total touches (all-right 2 [4/5])
total touches (excluding X)
total touches (excluding X-1)
total touches (excluding X-2)
total touches (excluding X-3)
total touches (excluding X-4)
total touches (excluding X-5)
total touches (excluding X-blue)
total touches (excluding X-yellow)
total touches (excluding X-left 2 [1/2])
total touches (excluding X-right 2 [4/5])
total touches (training)
total touches (training-1)
total touches (training-2)
total touches (training-3)
total touches (training-4)
total touches (training-5)
total touches (training excluding X)
total touches (training excluding X-1)
total touches (training excluding X-2)
total touches (training excluding X-3)
total touches (training excluding X-4)
total touches (training excluding X-5)
Dog ID
block color
total touches (all)
total touches (all-1)
total touches (all-2)
total touches (all-3)
total touches (all-4)
total touches (all-5)
total touches (all-blue)
total touches (all-yellow)
total touches (all-left 2 [1/2])
total touches (all-right 2 [4/5])
total touches (excluding X)
total touches (excluding X-1)
total touches (excluding X-2)
total touches (excluding X-3)
total touches (excluding X-4)
total touches (excluding X-5)
total touches (excluding X-blue)
total touches (excluding X-yellow)
total touches (excluding X-left 2 [1/2])
total touches (excluding X-right 2 [4/5])
total touches (training)
total touches (training-1)
total touches (training-2)
total touches (training-3)
total touches (training-4)
total touches (training-5)
total touches (training excluding X)
total touches (training excluding X-1)
total touches (training excluding X-2)
total touches (training excluding X-3)
total touches (training excluding X-4)
total touches (training excluding X-5)
Dog ID
block color
total touches (all)
total touches (all-1)
total touches (all-2)
total touches (all-3)
total touches (all-4)
total touches (all-5)
total touches (all-blue)
total touches (all-yellow)
total touches (all-left 2 [1/2])
total touches (all-right 2 [4/5])
total touches (excluding X)
total touches (excluding X-1)
total touches (excluding X-2)
total touches (excluding X-3)
total touches (excluding X-4)
total touches (excluding X-5)
total touches (excluding X-blue)
total touches (excluding X-yellow)
total touches (excluding X-left 2 [1/2])
total touches (excluding X-right 2 [4/5])
total touches (training)
total touches (training-1)
total touches (training-2)
total touches (training-3)
total touches (training-4)
total touches (training-5)
total touches (training excluding X)
total touches (training excluding X-1)
total touches (training excluding X-2)
total touches (training excluding X-3)
[truncated: 308 more rows]
